# Supplementary material for: Highly regioselective synthesis of 2,4,5-(hetero)aryl substituted oxazoles by intermolecular [3+2]-cycloaddition of unsymmetrical internal alkynes
Source: Royal Society of Chemistry journal article supplement (doi:10.1039/c3cc45410j), 2013-01-01

## SUPPLEMENTARY INFORMATION

### Highly regioselective synthesis of 2,4,5-(hetero)aryl substituted oxazoles by intermolecular[3+2]-cycloaddition of unsymmetrical internal alkynes

Elli Chatzopoulou and Paul W. Davies\*

School of Chemistry, University of Birmingham, Birmingham, B15 2TT, UK.

|                                                                                                         |    |
|---------------------------------------------------------------------------------------------------------|----|
| General Experimental .....                                                                              | 1  |
| Starting Materials.....                                                                                 | 2  |
| Synthesis of the gold-complex Au-III .....                                                              | 4  |
| Synthesis of alkynes (1a-1l, 4a-4e and 6).....                                                          | 4  |
| Synthesis of N-substituted iminopyridinium ylides (2a-2f and 2aI-2aV) .....                             | 13 |
| Reaction optimisation survey: .....                                                                     | 17 |
| Formation of 2,4,5-trisubstituted oxazoles 3(a-l)(a-f), 5(a-e)a and 7.....                              | 19 |
| <sup>13</sup> C-NMR comparison table for characteristic peaks .....                                     | 34 |
| Compound 7 (2D-Spectra Analysis) .....                                                                  | 38 |
| Crystal Data for 3aa.....                                                                               | 39 |
| References .....                                                                                        | 40 |
| <sup>1</sup> H and <sup>13</sup> C-NMR spectra for all immediate precursors and catalysis products..... | 42 |

### **General Experimental**

Flash column chromatography: Fluorochem silica gel 60 (0.043-0.063 mm). Thin layer chromatography (TLC): Macherey Nagel silica gel 60F254 analytical plates which were developed using standard visualizing agents: UV fluorescence (254 and 366 nm), phosphomolybdic acid / $\Delta$ , potassium permanganate / $\Delta$  and vanillin / $\Delta$ . IR: Perkin–Elmer Spectrum 100 FTIR spectrometer. Only selected absorbencies ( $\nu_{\max}$ ) are reported in  $\text{cm}^{-1}$ . MS and HRMS (EI): VG ProSpec or VG-ZabSpec at 70 eV. High resolution EI spectra were measured using perfluorokerosene (PFK) as an internal calibrant. MS and HRMS (ES): Micromass LCT using a methanol mobile phase. HRMS was obtained using a lock-mass to adjust the calibrated mass scale. MS data are reported as  $m/z$  (relative intensity). Commercially available chemicals/reagents were purchased from Aldrich, Acros, Strem, Alfa Aesar and used without further purification unless reported. All catalysis reactions were carried out under argon in a heat gun-dried glassware. The solvents used were purified using a Pure Solv-MD solvent purification system and were transferred under argon. Anhydrous *m*-xylene was dried over 4 Å molecular sieves. The following cooling baths were used: 0 °C (ice/water), -78 °C (dry ice/acetone) and -40 °C (dry ice/acetonitrile). Asynt DrySyn heating blocks on stirrer hotplates were employed for reactions with temperature controlled *via* external probe. NMR: Spectra were recorded on Bruker AVIII300 ( $^1\text{H}$  = 300 MHz,  $^{13}\text{C}$  = 75.5 MHz) and Bruker AVIII400 ( $^1\text{H}$  = 400 MHz,  $^{13}\text{C}$  = 101 MHz) in the solvents indicated;  $\text{CDCl}_3$  purchased from Aldrich and  $\text{DMSO-d}_6$  from Goss Scientific. Chemical shifts ( $\delta$ ) are given in ppm relative to TMS. The solvent signals were used as references and the chemical shifts converted to the TMS scale ( $\text{CDCl}_3$ :  $\delta_{\text{c}} \equiv 77.16$  ppm; residual  $\text{CHCl}_3$  in  $\text{CDCl}_3$ :  $\delta_{\text{c}} \equiv 7.26$  ppm). Coupling constants ( $J$ ) are reported in Hz. Multiplicity is denoted in  $^1\text{H}$  NMR by: s (singlet), d (doublet), t (triplet), q (quadruplet), m (multiplet). 1D  $^{13}\text{C}$  NMR spectra were recorded using the UDEFT or PENDANT pulse sequences from the Bruker standard pulse program library. 2D  $^{13}\text{C}$  NMR HSQC and HMBC spectra were recorded using the Bruker standard pulse program library.

### ***Starting Materials***

The following compounds were prepared according to literature procedures.

#### **Chloro[tris(2,4-di-tert-butylphenyl)phosphite]gold (Au-II)**

(78%)<sup>1</sup> Data matches that reported in the literature.<sup>1</sup>

#### **3-Iodo-1*H*-indole (S1)**

(99%)<sup>2</sup> Data matches that reported in the literature.<sup>2</sup>

#### **1-Methyl-1*H*-indole (S2)**

(97%) Data matches that reported in the literature.<sup>3</sup>

#### **3-Iodo-1-methyl-1*H*-indole (S3)**

(76%)<sup>4</sup> Data matches that reported in the literature.<sup>4</sup>

#### **1-Benzyl-3-iodo-1*H*-indole (S4)**

(98%)<sup>5</sup> Data matches that reported in the literature.<sup>5</sup>

#### **2-(2,2-Dibromovinyl)furan (S5)**

(68%)<sup>6a</sup> Data matches that reported in the literature.<sup>6b</sup>

#### **2-Ethynylfuran (S6)**

(99%)<sup>7a</sup> Data matches that reported in the literature.<sup>7b</sup>

#### **2-(2,2-Dibromovinyl)thiophene (S7)**

(98%)<sup>6a</sup> Data matches that reported in the literature.<sup>8</sup>

#### **2-Ethynylthiophene (S8)**

(99%)<sup>7a</sup> Data matches that reported in the literature.<sup>9</sup>

#### **((4-Methoxyphenyl)ethynyl)trimethylsilane (S9)**

(71%)<sup>10a</sup> Data matches that reported in the literature.<sup>10b</sup>

#### **1-Ethynyl-4-methoxybenzene (S10)**

(99%)<sup>11</sup> Data matches that reported in the literature.<sup>11</sup>

#### **1-(2,2-Dibromovinyl)-4-fluorobenzene (S11)**

(98%)<sup>6a</sup> Data matches that reported in the literature.<sup>12</sup>

#### **1-Ethynyl-4-fluorobenzene (S12)**

(99%)<sup>7a</sup> Data matches that reported in the literature.<sup>13</sup>

#### **((2-Bromophenyl)ethynyl)trimethylsilane (S13)**

(99%)<sup>10a</sup> Data matches that reported in the literature.<sup>14</sup>

#### **1-Bromo-2-ethynylbenzene (S14)**

(99%)<sup>11</sup> Data matches that reported in the literature.<sup>15</sup>

**5-Bromo-3-iodo-1H-indole (S15)**

(92%)<sup>16</sup> Data matches that reported in the literature.<sup>16</sup>

**Methyl 1H-indole-6-carboxylate (S16)**

(72%)<sup>17a</sup> Data matches that reported in the literature.<sup>17b</sup>

**Methyl 3-iodo-1H-indole-6-carboxylate (S17)**

(98%)<sup>18</sup> Data matches that reported in the literature.<sup>18</sup>

**4-Iodo-N,N-dimethylaniline (S18)**

(71%)<sup>19a</sup> Data matches that reported in the literature.<sup>19b</sup>

**4-(4-Iodophenyl)morpholine (S19)**

(64%)<sup>20a</sup> Data matches that reported in the literature.<sup>20b</sup>

**4-(Phenylethynyl)aniline (S20)**

(58%)<sup>21a</sup> Data matches that reported in the literature.<sup>21b</sup>

**3-(Phenylethynyl)aniline (S21)**

(11%)<sup>22a</sup> Data matches that reported in the literature.<sup>22b</sup>

**4-Methoxybenzoyl chloride (S21)**

(99%)<sup>23</sup> Data matches that reported in the literature.<sup>23</sup>

**2-(2,4-Dinitrophenoxy)-1H-isoindole-1,3(2H)-dione (S22)**

(97%)<sup>24a,b</sup> Data matches that reported in the literature.<sup>24a,b</sup>

**O-(2,4-Dinitrophenyl)hydroxylamine (S23)**

(66%)<sup>24a,b</sup> Data matches that reported in the literature.<sup>24a,b</sup>

### Synthesis of the gold-complex Au-III

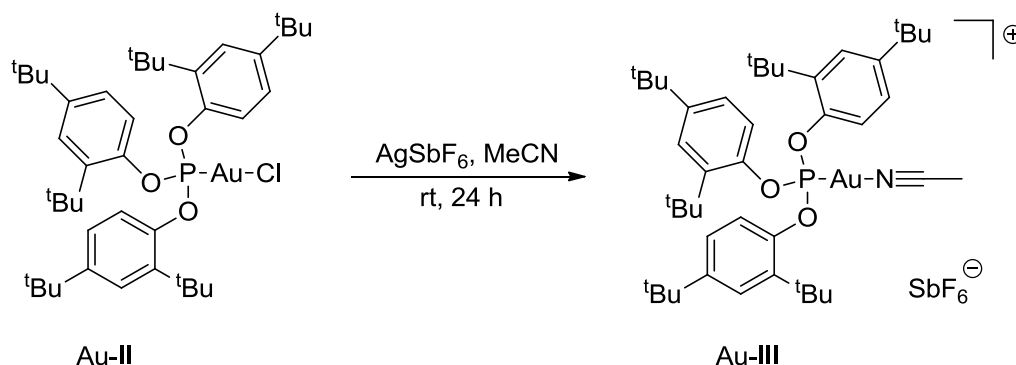

Following Echavarren's procedure,<sup>25</sup> a double-neck, round-bottom flask covered with aluminium foil was charged with  $\text{AgSbF}_6$  (60.9 mg, 0.18 mmol, 1.2 equiv) dissolved in MeCN (10 mL). Au-II (131.7 mg, 0.15 mmol, 1.0 equiv) was added at room temperature to the reaction mixture forming a white suspension. The reaction mixture was stirred at room temperature overnight. The solvent was removed under reduced pressure and the white solid residue was redissolved in  $\text{CH}_2\text{Cl}_2$  (15 mL). After filtration through a plug of silica, evaporation of the solvent and drying on the high vacuum line for at least 3 hours, the gold complex Au-III was afforded as a white powder (140 mg, 83%); mp. 78-80 °C;  $^1\text{H-NMR}$  (300 MHz,  $\text{CDCl}_3$ )  $\delta$  7.50-7.46 (m, 3H), 7.37 (dd,  $J = 8.5, 1.5$  Hz, 3H), 7.25 (dd,  $J = 8.5, 1.5$  Hz, 3H), 2.50 (s, 3H), 1.46 (s, 27H), 1.32 (s, 27H);  $^{13}\text{C-NMR}$  (101 MHz,  $\text{CDCl}_3$ )  $\delta$  149.2 (3  $\times$  C), 147.1 (3  $\times$  C), 139.1 (3  $\times$  C), 125.9 (3  $\times$  CH), 124.7 (3  $\times$  CH), 119.2 (3  $\times$  CH), 35.3 (3  $\times$  C), 34.7 (3  $\times$  C), 31.4 (9  $\times$   $\text{CH}_3$ ), 30.5 (9  $\times$   $\text{CH}_3$ ), 2.9 ( $\text{CH}_3$ ) ( $\text{C}_q$  of the  $\text{CH}_3\text{CN}$  is not obvious in the spectra);  $^{31}\text{P}$  NMR (300 MHz,  $\text{CDCl}_3$ )  $\delta$  87.5; HRMS (ES) calcd. for  $\text{C}_{44}\text{H}_{66}\text{NO}_3\text{PAu}$ : 884.4446, found: 884.4436  $[\text{M}]^+$ ; IR  $\nu_{\text{max}}/\text{cm}^{-1}$  3379, 2206, 1615, 1499, 1415, 1097, 1071, 740, 683.

### Synthesis of alkynes (1a-1l, 4a-4e and 6)

#### General Procedure 1 (GP1)

A mixture of the aryl iodide (1 equiv),  $\text{PdCl}_2(\text{PPh}_3)_2$  (5 mol%), CuI (3 mol%) and the terminal alkyne (1.2-3.0 equiv) in degassed  $\text{Et}_3\text{N}$  (0.4 M) was stirred at room temperature overnight. The reaction mixture was then filtered to remove the salts and the filtrate was evaporated under reduced pressure. The crude residue was purified by silica flash column chromatography.

### 3-(Phenylethynyl)-1H-indole (**1a**)

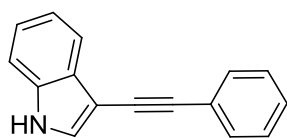

Internal alkyne **1a** was synthesised according to **GP1** using 3-iodoindole **S1** (2.43 g, 10.0 mmol), phenyl acetylene (1.34 mL, 12.0 mmol), PdCl<sub>2</sub>(PPh<sub>3</sub>)<sub>2</sub> (351 mg, 5 mol%), CuI (64 mg, 3 mol%) and Et<sub>3</sub>N (25 mL). After purification with silica flash column chromatography [Hexane:EtOAc (8:2)] the indole derivative was isolated as a brown solid (913 mg, 70%); mp. 140-142 °C; <sup>1</sup>H-NMR (300 MHz, DMSO-d<sub>6</sub>) δ 11.58 (bs, NH), 7.78 (d, *J* = 2.7 Hz, 1H), 7.67 (d, *J* = 7.6 Hz, 1H), 7.57-7.51 (m, 2H), 7.47-7.30 (m, 4H), 7.24-7.01 (m, 2H); <sup>13</sup>C-NMR (101 MHz, DMSO-d<sub>6</sub>) δ 135.5 (C), 130.8 (2 × CH), 129.7 (CH), 128.5 (2 × CH), 128.1 (C), 127.7 (C), 123.9 (CH), 122.4 (CH), 120.1 (CH), 119.0 (CH), 112.2 (CH), 96.1 (C), 90.6 (C), 84.4 (C); IR ν<sub>max</sub>/cm<sup>-1</sup> 3386, 2214, 1484, 1421, 1456, 1333, 1236, 1100, 819, 744, 688.

Data matches that reported in the literature.<sup>26</sup>

### 1-Methyl-3-(phenylethynyl)-1H-indole (**1b**)

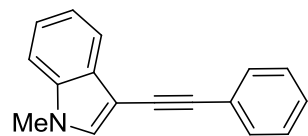

Internal alkyne **1b** was synthesised according to **GP1** using *N*-methyl-3-iodoindole **S2** (514 mg, 2.0 mmol), phenyl acetylene (0.25 mL, 2.4 mmol), PdCl<sub>2</sub>(PPh<sub>3</sub>)<sub>2</sub> (70.2 mg, 5 mol%), CuI (11.5 mg, 3 mol%) and Et<sub>3</sub>N (5 mL). After purification with silica flash column chromatography [Hexane:Toluene (9:1)] the indole derivative was isolated as a brown oil (228 mg, 49%); <sup>1</sup>H-NMR (300 MHz, CDCl<sub>3</sub>) δ 7.82 (dt, *J* = 7.6, 1.2 Hz, 1H), 7.60-7.51 (m, 2H), 7.38-7.33 (m, 3H), 7.33-7.28 (m, 2H), 7.25-7.19 (m, 2H), 3.80 (s, 3H); <sup>13</sup>C-NMR (101 MHz, CDCl<sub>3</sub>) δ 136.4 (C), 132.3 (CH), 131.4 (2 × CH), 129.3 (CH), 128.4 (2 × CH), 127.5 (CH), 124.5 (C), 122.8 (C), 120.5 (CH), 120.3 (CH), 109.7 (CH), 97.2 (C), 91.2 (C), 83.3 (C), 33.2 (CH<sub>3</sub>); IR ν<sub>max</sub>/cm<sup>-1</sup> 3052, 2932, 2209, 1596, 1487, 1424, 1155, 813, 737, 689.

Data matches that reported in the literature.<sup>27</sup>

### 1-Benzyl-3-(phenylethynyl)-1H-indole (**1c**)

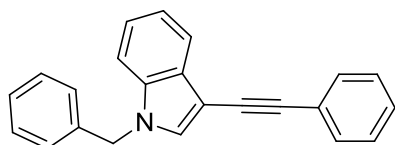

Internal alkyne **1c** was synthesised according to **GP1** using 1-benzyl-3-iodo-1H-indole **S4** (1.65 g, 5.0 mmol), phenyl acetylene (0.8 mL, 6.0 mmol), PdCl<sub>2</sub>(PPh<sub>3</sub>)<sub>2</sub> (150 mg, 5 mol%), CuI (63 mg, 3 mol%) and Et<sub>3</sub>N (5 mL). After

purification with silica flash column chromatography [Hexane:EtOAc (7:3)] the indole derivative was isolated as a brown solid (616 mg, 40%); mp. 116-118 °C;  $^1\text{H-NMR}$  (300 MHz,  $\text{CDCl}_3$ )  $\delta$  7.87-7.81 (m, 1H), 7.59-7.52 (m, 2H), 7.42 (s, 1H), 7.39-7.27 (m, 7H), 7.25-7.21 (m, 2H), 7.18-7.12 (m, 2H), 5.33 (s, 2H);  $^{13}\text{C-NMR}$  (101 MHz,  $\text{CDCl}_3$ )  $\delta$  136.7 (C), 136.0 (C), 131.7 (CH), 131.4 (2  $\times$  CH), 129.5 (C), 129.0 (2  $\times$  CH), 128.4 (2  $\times$  CH), 128.1 (CH), 127.7 (CH), 127.1 (2  $\times$  CH), 124.4 (C), 123.0 (CH), 120.8 (CH), 120.5 (CH), 110.2 (CH), 97.9 (C), 91.4 (C), 83.1 (C), 50.4 ( $\text{CH}_2$ ); IR  $\nu_{\text{max}}/\text{cm}^{-1}$  3388, 2216, 1598, 1496, 1214, 831, 741.

Data matches that reported in the literature.<sup>28</sup>

### 3-(Furan-2-ylethynyl)-1H-indole (1d)

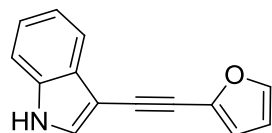

Internal alkyne **1d** was synthesised according to **GP1** using 3-iodoindole **S1** (729 mg, 3.0 mmol), 2-ethynylfuran **S6** (5.0 mmol),  $\text{PdCl}_2(\text{PPh}_3)_2$  (131 mg, 5 mol%), CuI (19 mg, 3 mol%) and  $\text{Et}_3\text{N}$  (8 mL). After purification with silica flash column chromatography [Hexane:EtOAc (9:1)] the indole derivative was isolated as a dark brown oil (98 mg, 16%);  $^1\text{H-NMR}$  (300 MHz,  $\text{CDCl}_3$ )  $\delta$  8.29 (bs, NH), 7.80 (d,  $J$  = 8.1 Hz, 1H), 7.52 (d,  $J$  = 2.7 Hz, 1H), 7.37 (dd,  $J$  = 1.8, 0.7 Hz, 1H), 7.35-7.30 (m, 1H), 7.22-7.13 (m, 2H), 6.64 (dd,  $J$  = 3.4, 0.7 Hz, 1H), 6.44 (dd,  $J$  = 3.4, 1.8 Hz, 1H);  $^{13}\text{C-NMR}$  (101 MHz,  $\text{CDCl}_3$ )  $\delta$  143.3 (CH), 138.1 (C), 135.3 (C), 128.7 (CH), 128.4 (C), 123.5 (CH), 121.1 (CH), 120.3 (CH), 114.5 (CH), 111.5 (CH), 111.1 (CH), 98.2 (C), 87.1 (C), 81.0 (C); HRMS (EI) calcd. for  $\text{C}_{14}\text{H}_9\text{NO}$ : 207.0684, found: 207.0686  $[\text{M}]^+$ ; IR  $\nu_{\text{max}}/\text{cm}^{-1}$  3376, 3059, 1615, 1514, 1488, 1239, 1114, 923, 766, 685.

### 3-(Thiophen-2-ylethynyl)-1H-indole (1e)

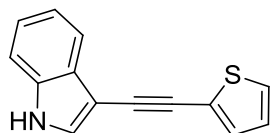

Internal alkyne **1e** was synthesised according to **GP1** using 3-iodoindole **S1** (729 mg, 3.0 mmol), 2-ethynylthiophene **S8** (0.5 mL, 5.0 mmol),  $\text{PdCl}_2(\text{PPh}_3)_2$  (131 mg, 5 mol%), CuI (19 mg, 3 mol%) and  $\text{Et}_3\text{N}$  (8 mL). After purification with silica flash column chromatography [Hexane:EtOAc (8:2)] the indole derivative was isolated as a dark brown solid (670 mg, 42%); mp. 69-71 °C;  $^1\text{H-NMR}$  (300 MHz,  $\text{CDCl}_3$ )  $\delta$  8.27 (bs, NH), 7.82 (dd,  $J$  = 8.0, 1.1 Hz, 1H), 7.49 (d,  $J$  = 2.7 Hz, 1H), 7.42-7.38 (m, 1H), 7.31-7.27 (m, 2H), 7.25-7.20 (m, 2H), 7.02 (dd,  $J$  = 5.2, 3.6 Hz, 1H);  $^{13}\text{C-NMR}$  (101 MHz,  $\text{CDCl}_3$ )  $\delta$  135.3 (C), 131.2

(CH), 128.5 (C), 128.1 (CH), 127.1 (CH), 126.5 (CH), 124.5 (C), 123.4 (CH), 121.0 (CH), 120.3 (CH), 111.4 (CH), 98.8 (C), 86.8 (C), 84.1 (C); HRMS (ES) calcd. for  $C_{14}H_{10}NS$ : 224.0534, found: 224.0523  $[M+H]^+$ ; IR  $\nu_{max}/cm^{-1}$  3382, 2206, 1457, 1255, 1098, 815, 742, 682.

### 1-Allyl-3-(thiophen-2-ylethynyl)-1H-indole (1f)

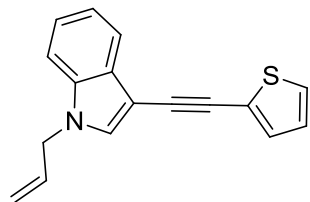

Internal alkyne **1e** (67 mg, 0.3 mmol), allyl bromide (0.03 mL, 0.3 mmol) and NaOH (25 mg, 0.6 mmol) were dissolved in DMSO (0.3 mL) and the reaction mixture was stirring at room temperature for 3h. The reaction mixture was diluted with EtOAc (5 mL) and washed with  $H_2O$  ( $2 \times 30$  mL). The aqueous phase was extracted with EtOAc ( $2 \times 10$  mL), and the combined organic phase was dried over  $Na_2SO_4$ . Filtration, evaporation of the solvents in reduced pressure and purification by silica column chromatography (Hexane) afforded **1f** as a viscous yellow oil (71 mg, 90%);  $^1H$ -NMR (300 MHz,  $CDCl_3$ )  $\delta$  7.83-7.78 (m, 1H), 7.39 (s, 1H), 7.36-7.28 (m, 3H), 7.26-7.19 (m, 2H), 7.01 (dd,  $J = 5.2, 3.6$  Hz, 1H), 6.07-5.92 (m, 1H), 5.25 (ddd,  $J = 10.3, 2.6, 1.4$  Hz, 1H), 5.12 (ddd,  $J = 17.1, 2.6, 1.7$  Hz, 1H), 4.74 (dt,  $J = 5.4, 1.7$  Hz, 1H);  $^{13}C$ -NMR (101 MHz,  $CDCl_3$ )  $\delta$  135.8 (C), 132.8 (CH), 131.6 (CH), 131.1 (CH), 129.3 (C), 127.1 (CH), 126.4 (CH), 124.6 (C), 123.0 (CH), 120.8 (CH), 120.5 (CH), 118.2 (CH), 110.0 (CH<sub>2</sub>), 97.4 (C), 87.0 (C), 84.1 (C), 49.2 (CH<sub>2</sub>); HRMS (ES) calcd. for  $C_{17}H_{14}NS$ : 264.0847, found: 264.0846  $[M+H]^+$ ; IR  $\nu_{max}/cm^{-1}$  2920, 2199, 1551, 1504, 1382, 1214, 1158, 925, 739, 701.

### 3-[(4-Methoxyphenyl)ethynyl]-1H-indole (1g)

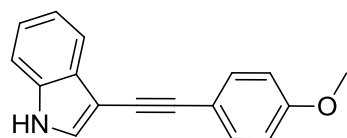

Internal alkyne **1g** was synthesised according to **GP1** using 3-iodoindole **S1** (486 mg, 2.0 mmol), 1-ethynyl-4-methoxybenzene **S10** (0.39 mL, 3.0 mmol),  $PdCl_2(PPh_3)_2$  (87 mg, 5 mol%), CuI (13 mg, 3 mol%) and  $Et_3N$  (8 mL). After purification with silica flash column chromatography [Hexane:EtOAc (8:2)] the indole derivative was isolated as a brown solid (196 mg, 40%); mp. 128-130 °C;  $^1H$ -NMR (300 MHz,  $CDCl_3$ )  $\delta$  8.19 (bs, NH), 7.82 (d,  $J = 7.6$  Hz, 1H), 7.51 (d,  $J = 8.8$  Hz, 2H), 7.46 (d,  $J = 2.6$  Hz, 1H), 7.40 (dd,  $J = 7.6, 1.1$  Hz, 1H), 7.29-7.19 (m, 2H), 6.89 (d,  $J = 8.8$  Hz, 2H), 3.84 (s, 3H);  $^{13}C$ -NMR (101 MHz,  $CDCl_3$ )  $\delta$  159.1 (C), 135.4 (C), 133.0 ( $2 \times$  CH), 130.9 (C), 128.6 (C),



127.5(CH), 123.3 (CH), 120.8 (CH), 120.3 (CH), 116.5 (C), 114.1 (2 × CH), 111.4 (CH), 91.0 (C), 81.4 (C), 55.5 (CH<sub>3</sub>); IR  $\nu_{\text{max}}/\text{cm}^{-1}$  3379, 1456, 1242, 1028, 815, 743, 707.

Data matches that reported in the literature.<sup>29</sup>

### 3-[(4-Fluorophenyl)ethynyl]-1H-indole (**1h**)

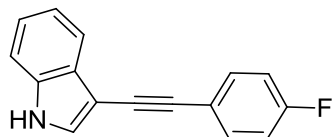

Internal alkyne **1h** was synthesised according to **GP1** using 3-iodoindole **S1** (600 mg, 2.5 mmol), 1-ethynyl-4-fluorobenzene **S12** (0.49 mL, 4.3 mmol), PdCl<sub>2</sub>(PPh<sub>3</sub>)<sub>2</sub>

(109 mg, 5 mol%), CuI (16 mg, 3 mol%) and Et<sub>3</sub>N (5 mL). After purification with silica flash column chromatography [Hexane:EtOAc (8:2)] the indole derivative was isolated as a dark brown solid (323 mg, 55%); mp. 170-172 °C; <sup>1</sup>H-NMR (300 MHz, CDCl<sub>3</sub>)  $\delta$  8.24 (bs, NH), 7.81 (dd,  $J$  = 7.6, 0.8 Hz, 1H), 7.57-7.51 (m, 2H), 7.49 (d,  $J$  = 2.6 Hz, 1H), 7.41 (dd,  $J$  = 7.4, 1.3 Hz, 1H), 7.28 (dd,  $J$  = 7.1, 1.3 Hz, 1H), 7.25-7.21 (m, 1H), 7.08-7.02 (m, 2H); <sup>13</sup>C-NMR (101 MHz, CDCl<sub>3</sub>)  $\delta$  162.3 (d,  $J_{\text{C-F}}$  = 250.1 Hz, C), 135.2 (C), 133.3 (d,  $J_{\text{C-F}}$  = 7.8 Hz, *meta*-2 × CH), 130.6 (C), 128.6 (C), 127.9 (CH), 123.4 (CH), 121.0 (CH), 120.2 (CH), 115.7 (d,  $J_{\text{C-F}}$  = 22.1 Hz, *ortho*-2 × CH), 112.3 (C), 111.5 (CH), 91.9 (C), 90.1 (C); HRMS (EI) calcd. for C<sub>16</sub>H<sub>10</sub>NF: 235.0797, found: 235.0796 [M]<sup>+</sup>; IR  $\nu_{\text{max}}/\text{cm}^{-1}$  3388, 2217, 1599, 1497, 1457, 1215, 1089, 831, 741, 627.

### 3-(Cyclopropylethynyl)-1H-indole (**1i**)

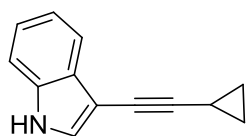

Internal alkyne **1i** was synthesised according to **GP1** using 3-iodoindole **S1** (972 mg, 4.0 mmol), cyclopropyl acetylene (1.0 mL, 11.8 mmol), PdCl<sub>2</sub>(PPh<sub>3</sub>)<sub>2</sub> (114 mg, 5 mol%), CuI (23 mg, 3

mol%) and Et<sub>3</sub>N (10 mL). After purification with silica flash column chromatography [Hexane:Toluene (9:1)] the indole derivative was isolated as a dark brown oil (707 mg, 98%); <sup>1</sup>H-NMR (300 MHz, CDCl<sub>3</sub>)  $\delta$  8.09 (bs, NH), 7.73 (dd,  $J$  = 7.6, 1.3 Hz, 1H), 7.40-7.36 (m, 1H), 7.35 (d,  $J$  = 2.6 Hz, 1H), 7.26-7.24 (m, 1H), 7.22 (dd,  $J$  = 8.2, 1.5 Hz, 1H), 1.58-1.50 (m, 1H), 0.92-0.80 (m, 4H); <sup>13</sup>C-NMR (101 MHz, CDCl<sub>3</sub>)  $\delta$  135.3 (C), 129.0 (C), 127.4 (CH), 123.0 (CH), 120.6 (CH), 120.1 (CH), 111.3 (CH), 99.5 (C), 94.8 (C), 68.6 (C), 8.8 (2 × CH<sub>2</sub>), 0.5 (CH); HRMS (ES) calcd. for C<sub>13</sub>H<sub>12</sub>N: 182.0970, found: 182.0969 [M+H]<sup>+</sup>; IR  $\nu_{\text{max}}/\text{cm}^{-1}$  3380, 1607, 1485, 1432, 1174, 930, 830, 736, 697.

### 3-((2-Bromophenyl)ethynyl)-1H-indole (**1j**)

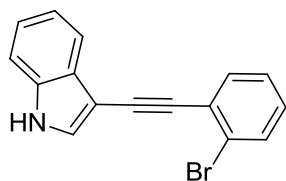

Internal alkyne **1j** was synthesised according to **GP1** using methyl 3-iodo-1H-indole **S1** (729 mg, 3.0 mmol), 1-bromo-2-ethynylbenzene **S14** (6.0 mmol), PdCl<sub>2</sub>(PPh<sub>3</sub>)<sub>2</sub> (131 mg, 5 mol%), CuI (19 mg, 3 mol%) and Et<sub>3</sub>N (5 mL). After purification with silica flash column chromatography [Hexane:EtOAc (9:1)] the indole derivative was isolated as a brown oil (171 mg, 19%); <sup>1</sup>H-NMR (300 MHz, CDCl<sub>3</sub>) δ 8.31 (bs, NH), 7.95-7.90 (m, 1H), 7.63 (dd, *J* = 8.0, 1.1 Hz, 1H), 7.58 (dd, *J* = 7.7, 1.6 Hz, 1H), 7.54 (d, *J* = 2.7 Hz, 1H), 7.44-7.40 (m, 1H), 7.35-7.27 (m, 3H), 7.19-7.12 (m, 1H); <sup>13</sup>C-NMR (101 MHz, CDCl<sub>3</sub>) δ 209.7 (C), 135.4 (C), 132.9 (CH), 132.5 (CH), 128.7 (CH), 128.2 (CH), 127.1 (CH), 126.5 (C), 125.1 (C), 123.4 (CH), 121.1 (CH), 120.5 (CH), 111.5 (CH), 98.8 (C), 90.0 (C), 88.2 (C); HRMS (ES) calcd. for C<sub>16</sub>H<sub>11</sub>NBr: 296.0075, found: 296.0061 [M+H]<sup>+</sup>; IR ν<sub>max</sub>/cm<sup>-1</sup> 3395, 3258, 2206, 1456, 1229, 1098, 1025, 838, 739.

### 5-Bromo-3-(phenylethynyl)-1H-indole (**1k**)

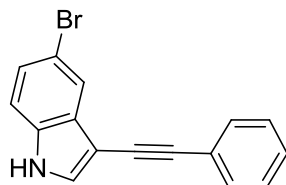

Internal alkyne **1k** was synthesised according to **GP1** using methyl 5-bromo-3-iodo-1H-indole **S15** (258 g, 0.8 mmol), phenyl acetylene (0.15 mL, 1.1 mmol), PdCl<sub>2</sub>(PPh<sub>3</sub>)<sub>2</sub> (28 mg, 5 mol%), CuI (5 mg, 3 mol%) and Et<sub>3</sub>N (3 mL). After purification with silica flash column chromatography [Hexane:EtOAc (9:1)] the indole derivative was isolated as a brown solid (169 mg, 71%); mp. 96-98 °C; <sup>1</sup>H-NMR (300 MHz, CDCl<sub>3</sub>) δ 8.28 (bs, NH), 7.95 (d, *J* = 1.6 Hz, 1H), 7.58-7.55 (dd, *J* = 7.9, 1.6 Hz, 2H), 7.48 (d, *J* = 2.6 Hz, 1H), 7.41-7.29 (m, 5H); <sup>13</sup>C-NMR (101 MHz, CDCl<sub>3</sub>) δ 134.0 (C), 131.5 (2 × CH), 130.3 (C), 128.8 (CH), 128.5 (2 × CH), 128.0 (CH), 126.3 (CH), 123.9 (C), 122.9 (CH), 114.4 (C), 113.0 (CH), 99.0 (C), 91.5 (C), 82.1 (C); HRMS (EI) calcd. for C<sub>16</sub>H<sub>10</sub>NBr: 294.9997, found: 294.9993 [M]<sup>+</sup>; IR ν<sub>max</sub>/cm<sup>-1</sup> 3414, 2211, 1448, 1285, 1098, 872, 757, 692.

### Methyl 3-(phenylethynyl)-1H-indole-6-carboxylate (**1l**)

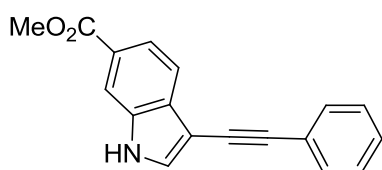

Internal alkyne **1l** was synthesised according to **GP1** using methyl 3-iodo-1H-indole-6-carboxylate **S17** (753 mg, 2.5 mmol), phenyl acetylene (0.34 mL, 3.0

mmol), PdCl<sub>2</sub>(PPh<sub>3</sub>)<sub>2</sub> (109 mg, 5 mol%), CuI (16 mg, 3 mol%) and Et<sub>3</sub>N (5 mL). After purification with silica flash column chromatography [Hexane:EtOAc (7:3)] the indole derivative was isolated as a dark brown solid (337 mg, 49%); mp. 166-168 °C; <sup>1</sup>H-NMR (300 MHz, CDCl<sub>3</sub>) δ 8.57 (bs, NH), 8.17 (dd, *J* = 1.4, 0.7 Hz, 1H), 7.92 (dd, *J* = 8.4, 1.4 Hz, 1H), 7.85 (d, *J* = 8.4 Hz, 1H), 7.63 (d, *J* = 2.7 Hz, 1H), 7.60-7.55 (m, 2H), 7.41-7.33 (m, 3H), 3.95 (s, 3H); <sup>13</sup>C-NMR (101 MHz, CDCl<sub>3</sub>) δ 168.0 (C), 134.8 (C), 132.2 (C), 131.5 (2 × CH), 130.8 (CH), 128.5 (2 × CH), 128.0 (CH), 125.2 (C), 123.9 (C), 121.9 (CH), 120.0 (CH), 113.4 (CH), 99.7 (C), 91.7 (C), 82.1 (C), 52.2 (CH<sub>3</sub>); HRMS (ES) calcd. for C<sub>18</sub>H<sub>14</sub>NO<sub>2</sub>: 276.1025, found: 276.1027 [M+H]<sup>+</sup>; IR ν<sub>max</sub>/cm<sup>-1</sup> 3316, 2216, 1697, 1284, 1223, 756, 688.

***N,N*-Dimethyl-4-(phenylethynyl)aniline (4a)**

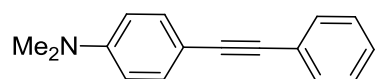

Internal alkyne **4a** was synthesised according to **GP1** using 4-iodo-*N,N*-dimethyl aniline **S18** (879 mg, 3.6 mmol), PdCl<sub>2</sub>(PPh<sub>3</sub>)<sub>2</sub> (25 mg, 1 mol%), CuI (20 mg, 1 mol%) and the phenyl acetylene (0.44 mL, 4.3 mmol) in degassed Et<sub>3</sub>N (8 mL). The reaction mixture was stirred at 50 °C overnight. After purification with silica flash column chromatography [Hexane:EtOAc (99:1)], the product was isolated as a light brown solid (175 mg, 22%); mp. 108-110 °C; <sup>1</sup>H-NMR (300 MHz, CDCl<sub>3</sub>) δ 7.52-7.47 (m, 2H), 7.41 (d, *J* = 9.0 Hz, 2H), 7.35-7.27 (m, 3H), 6.66 (d, *J* = 9.0 Hz, 2H), 2.99 (s, 6H); <sup>13</sup>C-NMR (101 MHz, CDCl<sub>3</sub>) δ 150.2 (C), 132.9 (2 × CH), 131.4 (2 × CH), 128.4 (CH), 127.6 (2 × CH), 124.3 (C), 112.0 (2 × CH), 110.0 (C), 90.6 (C), 86.9 (C), 40.4 (2 × CH<sub>3</sub>); IR ν<sub>max</sub>/cm<sup>-1</sup> 3378, 2206, 1607, 1522, 1441, 1227, 1102, 1071, 745.

Data matches that reported in the literature.<sup>30</sup>

**4-[4-(Phenylethynyl)phenyl]morpholine (4b)**

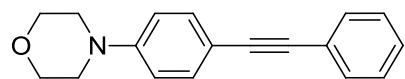

Internal alkyne **4b** was synthesised according to **GP1** using 4-(4-iodophenyl)morpholine aniline **S19** (925 mg, 3.2 mmol), PdCl<sub>2</sub>(PPh<sub>3</sub>)<sub>2</sub> (22 mg, 1 mol%), CuI (18 mg, 1 mol%) and the phenyl acetylene (0.40 mL, 3.8 mmol) in degassed Et<sub>3</sub>N (7.5 mL). The reaction mixture was stirred at 50 °C overnight. Purification with silica flash column chromatography [Hexane:EtOAc (3:1)], afforded the aniline derivative as a light brown solid (432 mg, 51%); mp. 178-180 °C; <sup>1</sup>H-NMR (300 MHz, CDCl<sub>3</sub>) δ 7.54-7.48 (m, 2H), 7.45 (d, *J* = 8.9

Hz, 2H), 7.38-7.28 (m, 3H), 6.86 (d,  $J = 8.9$  Hz, 2H), 3.91-3.80 (m, 4H), 3.26-3.16 (m, 4H);  $^{13}\text{C}$ -NMR (101 MHz,  $\text{CDCl}_3$ )  $\delta$  151.0 (C), 132.9 (2  $\times$  CH), 131.6 (2  $\times$  CH), 128.4 (2  $\times$  CH), 127.9 (CH), 123.9 (C), 115.0 (2  $\times$  CH), 114.0 (C), 89.9 (C), 88.1 (C), 66.9 (2  $\times$   $\text{CH}_2$ ), 48.7 (2  $\times$   $\text{CH}_2$ ); HRMS (ES) calcd. for  $\text{C}_{18}\text{H}_{18}\text{NO}$ : 264.1388, found: 264.1381  $[\text{M}+\text{H}]^+$ ; IR  $\nu_{\text{max}}/\text{cm}^{-1}$  2961, 2855, 2830, 2208, 1607, 1592, 1444, 1382, 1263, 1236, 1068, 818, 760.

**1-[4-(Phenylethynyl)phenyl]pyrrolidine (4c)**

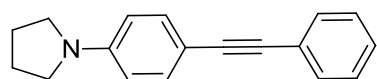

4-(Phenylethynyl)aniline **S20** (773 mg, 4.0 mmol) was dissolved in toluene (5 mL), 1,4-dibromobutane (0.86 mL, 7.2 mmol) and DIPEA (1.68 mL, 9.6 mmol) were added to the reaction mixture. After refluxing for 16 h at 120  $^{\circ}\text{C}$ , the mixture was allowed to cool and the inorganic salts formed were removed by filtration and washed with EtOAc. Evaporation of the solvent under reduced pressure and purification of the crude residue with silica flash column chromatography [Hexane:EtOAc (9:1)] afforded the aniline derivative as an orange solid (940 mg, 95%); mp. 168-172  $^{\circ}\text{C}$ ;  $^1\text{H}$ -NMR (300 MHz,  $\text{CDCl}_3$ )  $\delta$  7.52-7.47 (m, 2H), 7.40 (d,  $J = 8.8$  Hz, 2H), 7.35-7.28 (m, 3H), 6.51 (d,  $J = 8.8$  Hz, 2H), 3.31 (t,  $J = 6.6$  Hz, 4H), 2.06-1.97 (m, 4H);  $^{13}\text{C}$ -NMR (101 MHz,  $\text{CDCl}_3$ )  $\delta$  161.1 (C), 132.8 (2  $\times$  CH), 131.4 (2  $\times$  CH), 128.4 (2  $\times$  CH), 127.3 (C), 127.5 (CH), 126.7 (C), 111.5 (2  $\times$  CH), 77.2 (C), 73.5 (C), 47.6 (2  $\times$   $\text{CH}_2$ ), 25.6 (2  $\times$   $\text{CH}_2$ ); HRMS (EI) calcd. for  $\text{C}_{18}\text{H}_{17}\text{N}$ : 247.1361, found: 247.1362  $[\text{M}]^+$ ; IR  $\nu_{\text{max}}/\text{cm}^{-1}$  2962, 2869, 1608, 1518, 1159, 1026, 957, 812, 750.

**1-(3-(Phenylethynyl)phenyl)pyrrolidine (4d)**

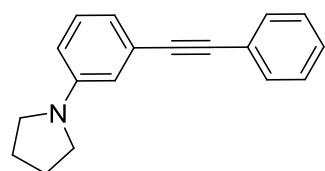

3-(Phenylethynyl)aniline **S21** (218 mg, 1.2 mmol) was dissolved in toluene (3 mL), 1,4-dibromobutane (0.24 mL, 2.0 mmol) and DIPEA (0.46 mL, 2.7 mmol) were added to the reaction mixture. After refluxing for 16 h at 120  $^{\circ}\text{C}$ , the mixture was allowed to cool and the inorganic salts formed were removed by filtration and washed with EtOAc. Evaporation of the solvent under reduced pressure and purification of the crude residue with silica flash column chromatography (Hexane) afforded the aniline derivative as a yellow oil (112 mg, 41%);  $^1\text{H}$ -NMR (300 MHz,  $\text{CDCl}_3$ )  $\delta$  7.61-7.51 (m, 2H), 7.41-7.30 (m, 3H), 7.20 (app. t,  $J = 7.9$  Hz, 1H), 6.89-6.83 (m, 1H), 6.76-6.43 (m,

1H), 6.59-6.52 (m, 1H), 3.37-3.24 (m, 4H), 2.08-1.96 (m, 4H);  $^{13}\text{C}$ -NMR (101 MHz,  $\text{CDCl}_3$ )  $\delta$  147.8 (C), 131.8 (2  $\times$  CH), 129.2 (CH), 128.4 (2  $\times$  CH), 128.1 (CH), 123.7 (C), 119.0 (CH), 114.6 (CH), 112.2 (CH), 90.7 (C), 88.3 (C), 47.7 (2  $\times$   $\text{CH}_2$ ), 25.6 (2  $\times$   $\text{CH}_2$ ); HRMS (ES) calcd. for  $\text{C}_{18}\text{H}_{18}\text{N}$ : 248.1439, found: 247.1441  $[\text{M}+\text{H}]^+$ ; IR  $\nu_{\text{max}}/\text{cm}^{-1}$  2965, 2834, 1592, 1439, 1373, 1173, 1009, 837, 753, 684.

#### 1-Methoxy-4-(phenylethynyl)benzene (4e)

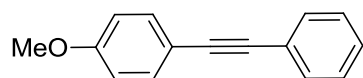

Internal alkyne **4e** was synthesised according to **GP1** using *p*-iodoanisole (1.17 g, 5.0 mmol),  $\text{PdCl}_2(\text{PPh}_3)_2$  (176 mg, 5 mol%), CuI (96 mg, 10 mol%) and phenyl acetylene (0.63 mL, 6.0 mmol) in degassed  $\text{Et}_3\text{N}$  (10 mL). The reaction mixture was stirred at room temperature overnight. After purification with silica flash column chromatography (Hexane), the product was isolated as a yellow solid (824 mg, 80%); mp. 54-56  $^\circ\text{C}$ ;  $^1\text{H}$ -NMR (300 MHz,  $\text{CDCl}_3$ )  $\delta$  7.47-7.43 (m, 2H), 7.40 (d,  $J$  = 8.9 Hz, 2H), 7.31-7.22 (m, 3H), 6.84-6.78 (d,  $J$  = 8.9 Hz, 2H), 3.76 (s, 3H);  $^{13}\text{C}$ -NMR (101 MHz,  $\text{CDCl}_3$ )  $\delta$  159.8 (C), 133.2 (2  $\times$  CH), 131.6 (2  $\times$  CH), 128.5 (2  $\times$  CH), 128.1 (CH), 123.8 (C), 115.6 (C), 114.2 (2  $\times$  CH), 88.5 (C), 88.2 (C), 55.5 ( $\text{CH}_3$ ); IR  $\nu_{\text{max}}/\text{cm}^{-1}$  2994, 2217, 1594, 1508, 1439, 1243, 1178, 1027, 832, 752, 690.

Data matches that reported in the literature.<sup>31</sup>

#### 4-((4-Methoxyphenyl)ethynyl)-*N,N*-dimethylaniline (6)

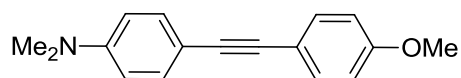

Following a known procedure,<sup>32</sup> a mixture of *p*-iodoanisole (749 mg, 3.2 mmol, 1.0 equiv), 4-ethynyl-*N,N*-dimethylaniline (3.8 mmol, 1.4 equiv),  $\text{NiCl}_2(\text{PPh}_3)_2$  (105 mg, 5 mol%), CuI (61 mg, 10 mol%) and  $\text{K}_2\text{CO}_3$  (883 mg, 6.4 mmol, 2.0 equiv) in dioxane (13 mL) and water (5 mL) was stirred under argon at reflux for 2 hours. Filtration through a silica pad, evaporation of the solvent and purification with silica column chromatography [Hexane:EtOAc (9:1)] to yield the aniline derivative as a yellow solid (300 mg, 37%); mp. 118-120  $^\circ\text{C}$ ;  $^1\text{H}$ -NMR (300 MHz,  $\text{CDCl}_3$ )  $\delta$  7.44 (d,  $J$  = 8.9 Hz, 2H), 7.39 (d,  $J$  = 9.0 Hz, 2H), 6.85 (d,  $J$  = 8.9 Hz, 2H), 6.68 (bd,  $J$  = 9.0 Hz, 2H), 3.82 (s, 3H), 3.00 (s, 6H);  $^{13}\text{C}$ -NMR (101 MHz,  $\text{CDCl}_3$ )  $\delta$  159.2 (C), 150.1 (C), 132.8 (2  $\times$  CH), 132.7 (2  $\times$  CH), 116.5 (C), 114.0 (2  $\times$  CH), 112.0 (2  $\times$  CH), 110.6 (C), 89.2 (C), 87.3 (C), 55.4 ( $\text{CH}_3$ ), 40.4 ( $\text{CH}_3$ ), IR  $\nu_{\text{max}}/\text{cm}^{-1}$  3217, 1609, 1525, 1496, 1238, 1024, 817.

Data matches that reported in the literature.<sup>33</sup>

### ***Synthesis of N-substituted iminopyridinium ylides (2a-2f and 2aI-2aV)***

#### **General Procedure 2 (GP2)**

*N*-Aminopyridinium iodide (1.0 equiv) was added to an aqueous solution of 10% aq. NaOH at 0°C and stirred for 10 min. Acid chloride (2.0 equiv) was added at this temperature and the mixture stirred overnight at room temperature. The resulting suspension was then extracted with CH<sub>2</sub>Cl<sub>2</sub> (3 times) and the organic layer dried over Na<sub>2</sub>SO<sub>4</sub>. Evaporation of the solvent under reduced pressure afforded the desired ylides which, if necessary, were purified by recrystallisation.

#### ***Benzoyl(pyridin-1-ium-1-yl)amide (2a/2a-I)***

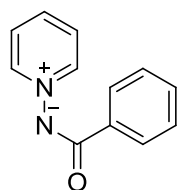

Ylide **2a** was synthesised according to **GP2** using *N*-aminopyridinium iodide (888 mg, 4.0 mmol) and benzoyl chloride (0.9 mL, 8.0 mmol) in 10% aq. NaOH (20 mL). Recrystallisation of the crude residue from CH<sub>2</sub>Cl<sub>2</sub>/Et<sub>2</sub>O afforded the desired ylide as off-white needles (605 mg, 76%); mp. 187-189 °C; <sup>1</sup>H-NMR (300 MHz, CDCl<sub>3</sub>) 8.84 (dd, *J* = 6.8, 1.2 Hz, 2H), 8.23-8.14 (m, 2H), 8.01-7.91 (m, 1H), 7.69-7.71 (m, 2H), 7.51-7.39 (m, 3H); <sup>13</sup>C-NMR (101 MHz, CDCl<sub>3</sub>) δ 170.7 (C), 143.6 (2 × CH), 137.2 (C), 137.0 (CH), 130.4 (CH), 128.0 (2 × CH), 128.1 (2 × CH), 126.0 (2 × CH); HRMS (ES) calcd for C<sub>12</sub>H<sub>10</sub>N<sub>2</sub>ONa: 221.0691, found: 221.0694 [M+Na]<sup>+</sup>.

Data matches that reported in the literature.<sup>34</sup>

#### ***(2-Bromobenzoyl)(pyridin-1-ium-1-yl)amide (2b)***

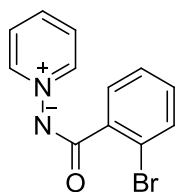

Ylide **2b** was synthesised according to **GP2** using *N*-aminopyridinium iodide (444 mg, 2.0 mmol) and 2-bromobenzoyl chloride (0.55 mL, 4.0 mmol) in 10% aq. NaOH (10 mL). Recrystallisation of the crude residue from CH<sub>2</sub>Cl<sub>2</sub>/Et<sub>2</sub>O afforded the desired ylide as off-white needles (411 mg, 74%); mp. 102-103 °C; <sup>1</sup>H-NMR (300 MHz, CDCl<sub>3</sub>) δ 8.90 (dd, *J* = 6.9, 1.3 Hz, 2H), 8.05-7.94 (m, 1H), 7.79-7.70 (m, 2H), 7.67-7.57 (m, 2H), 7.35 (td, *J* = 7.5, 1.3 Hz, 1H), 7.25-7.18 (m, 1H); <sup>13</sup>C-NMR (101 MHz, CDCl<sub>3</sub>) δ 172.6 (C), 143.3 (2 × CH), 140.5 (C), 137.6 (CH), 133.1 (CH), 129.8 (CH), 129.4 (CH), 127.3 (CH), 126.4 (2 × CH), 120.9 (C); IR  $\nu_{\text{max}}$ /cm<sup>-1</sup> 1584, 1465, 1347, 1256, 1022, 751.

Data matches that reported in the literature.<sup>34</sup>

**(4-Methoxybenzoyl)(pyridin-1-ium-1-yl)amide (2c)**

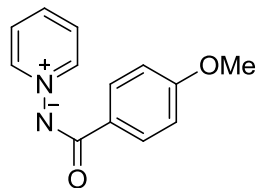

Ylide **2c** was synthesised according to **GP2** using *N*-aminopyridinium iodide (444 mg, 2.0 mmol) and 2-methoxybenzoyl chloride **S21** (0.5 mL, 4.0 mmol) in 10% aq. NaOH (10 mL). Recrystallisation of the crude residue from CH<sub>2</sub>Cl<sub>2</sub>/Et<sub>2</sub>O afforded the desired ylide as white needles (302 mg, 66%); mp. 148-150 °C; <sup>1</sup>H-NMR (300 MHz, CDCl<sub>3</sub>) δ 8.79 (dd, *J* = 6.9, 1.2 Hz, 2H), 8.11 (d, *J* = 8.9 Hz, 2H), 7.88 (tt, *J* = 7.7, 6.9 Hz, 1H), 7.64 (app t, *J* = 7.2 Hz, 2H), 6.92 (d, *J* = 8.9 Hz, 2H), 3.86 (s, 3H); <sup>13</sup>C-NMR (101 MHz, CDCl<sub>3</sub>) δ 170.5 (C), 161.5 (C), 143.5 (2 × CH), 136.6 (CH), 129.7 (2 × CH, C), 126.0 (2 × CH), 113.2 (2 × CH), 55.4 (OCH<sub>3</sub>); IR *v*<sub>max</sub>/cm<sup>-1</sup> 3596, 3060, 1606, 1547, 1463, 1331, 1242, 1179, 1032, 843, 762.

Data matches that reported in the literature.<sup>35</sup>

**(4-Fluorobenzoyl)(pyridin-1-ium-1-yl)amide (2d)**

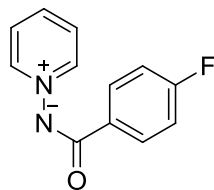

Ylide **2d** was synthesised according to **GP2** using *N*-aminopyridinium iodide (444 mg, 2.0 mmol) and 4-fluorobenzoyl chloride (0.6 mL, 5.0 mmol) in NaOH (10%, 10 mL). Recrystallisation of the crude residue from CH<sub>2</sub>Cl<sub>2</sub>/Et<sub>2</sub>O afforded the desired ylide as off-white needles (280 mg, 65%); mp. 183-184 °C; <sup>1</sup>H-NMR (300 MHz, CDCl<sub>3</sub>) δ 8.84-8.79 (m, 2H), 8.20-8.12 (m, 2H), 7.99-7.92 (m, 1H), 7.74-7.66 (m, 2H), 7.13-7.04 (m, 2H); <sup>13</sup>C-NMR (101 MHz, CDCl<sub>3</sub>) δ 170.0 (C), 164.4 (d, *J*<sub>C-F</sub> = 250.1 Hz, *ipso*-C<sub>q</sub>), 143.4 (2 × CH), 137.0 (CH), 133.4 (d, *J*<sub>C-F</sub> = 3.2 Hz, *para*-C), 130.3 (d, *J*<sub>C-F</sub> = 8.4 Hz, *meta*-2 × CH), 126.2 (2 × CH), 114.8 (d, *J*<sub>C-F</sub> = 22.4 Hz, *ortho*-2 × CH); HRMS (ES) calcd for C<sub>12</sub>H<sub>10</sub>N<sub>2</sub>OF: 217.0777, found: 217.0772 [M+H]<sup>+</sup>; IR *v*<sub>max</sub>/cm<sup>-1</sup> 3116, 3061, 1607, 1555, 1325, 1213, 1170, 860, 765.

**General Procedure 3 (GP3)**

*N*-Aminopyridinium iodide (1.0 equiv) was suspended in MeOH, followed by addition of K<sub>2</sub>CO<sub>3</sub> (2.4 equiv) and the corresponding acyl chloride (1.2 equiv). The reaction mixture was stirred at room temperature for 3 days. Undissolved salts removed by filtration through a filter paper and the filtrate was evaporated under reduced



pressure. The resulting crude mixture was purified by column chromatography using neutral or basic  $\text{Al}_2\text{O}_3$  (5% MeOH/ $\text{CH}_2\text{Cl}_2$ ).

#### N-2-Furoyliminopyridinium ylide (2e)

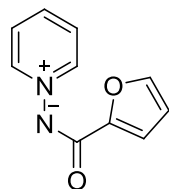

Ylide **2e** was synthesised according to **GP3** using *N*-aminopyridinium iodide (1.11 g, 5.0 mmol),  $\text{K}_2\text{CO}_3$  (1.74 g, 12.0 mmol) and 2-furoyl chloride (0.6 mL, 6.0 mmol). After purification by column chromatography using  $\text{Al}_2\text{O}_3$  (5% MeOH/ $\text{CH}_2\text{Cl}_2$ ) the ylide was isolated as an off-white solid (872 mg, 93%); mp. 182-184 °C;  $^1\text{H}$ -NMR (300 MHz,  $\text{CDCl}_3$ )  $\delta$  8.86 (dd,  $J$  = 7.1, 1.3 Hz, 2H), 8.00-7.92 (m, 1H), 7.70 (t,  $J$  = 7.1 Hz, 2H), 7.51 (dd,  $J$  = 1.8, 0.9 Hz, 1H), 7.11 (dd,  $J$  = 3.4, 0.8 Hz, 1H), 6.50 (dd,  $J$  = 3.4, 1.8 Hz, 1H);  $^{13}\text{C}$ -NMR (101 MHz,  $\text{CDCl}_3$ )  $\delta$  163.6 (C), 151.2 (C), 143.4 (2  $\times$  CH), 143.2 (CH), 136.9 (CH), 126.0 (2  $\times$  CH), 112.8 (CH), 111.1 (CH); MS (ES):  $m/z$  211.2 ( $[\text{M}+\text{Na}]$ , 100%).

Data matches that reported in the literature.<sup>34</sup>

#### Pyridin-1-ium-1-yl(thiophene-2-carbonyl)amide (2f)

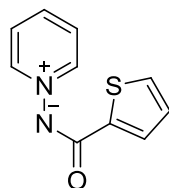

Ylide **2f** was synthesised according to **GP3** by using *N*-aminopyridinium iodide (444 mg, 2.0 mmol),  $\text{K}_2\text{CO}_3$  (663 mg, 4.8 mmol) and 2-thiophenecarbonyl chloride (0.26 mL, 2.4 mmol). After purification by filtration over a plug of  $\text{Al}_2\text{O}_3$ , washing (3 times) with (5% MeOH/ $\text{CH}_2\text{Cl}_2$ ) and evaporation of the solvent under reduced pressure, the title compound was isolated as an off-white solid (403 mg, 98%); mp. 224-226 °C;  $^1\text{H}$ -NMR (300 MHz,  $\text{CDCl}_3$ )  $\delta$  8.75 (dd,  $J$  = 7.0, 1.3 Hz, 2H), 7.98-7.86 (m, 1H), 7.76 (dd,  $J$  = 3.6, 1.3 Hz, 1H), 7.66-7.57 (m, 2H), 7.38 (dd,  $J$  = 5.0, 1.3 Hz, 1H), 7.08 (dd,  $J$  = 5.0, 3.6 Hz, 1H);  $^{13}\text{C}$ -NMR (101 MHz,  $\text{CDCl}_3$ )  $\delta$  166.7 (C), 143.4 (CH), 136.9 (CH), 133.6 (C), 129.2 (CH), 128.4 (CH), 127.3 (2  $\times$  CH), 126.1 (2  $\times$  CH); IR  $\nu_{\text{max}}/\text{cm}^{-1}$  3065, 1555, 1466, 1422, 1357, 1294, 1170, 858, 711.

Data matches that reported in the literature.<sup>36</sup>

#### General Procedure 4 (GP4)

Using a modification of published procedure,<sup>25</sup> the substituted pyridine (1.0 equiv) and *O*-(2,4-dinitrophenyl)hydroxylamine (1.1 equiv) were dissolved in a 1:1 mixture of THF: $\text{H}_2\text{O}$  (2.8 M). The reaction mixture was stirred at 40 °C for 12 h. Then, the mixture was cooled to room temperature and poured into aq. NaOH (2.5M). Benzoyl



chloride (1.5 equiv) was added dropwise and the reaction mixture stirred for 4 h at room temperature. Subsequently the mixture was diluted with water and extracted (3 times) with  $\text{CHCl}_3$ . The organic layer washed with aq. NaOH (2.5 M), dried over  $\text{MgSO}_4$  and the solvent was removed under reduced pressure. The crude residue was purified by column chromatography to afford the pure ylide.

***Benzoyl(2,6-dimethylpyridin-1-ium-1-yl)amide (2a-II)***

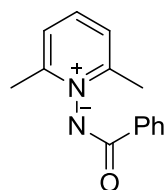

Ylide **2a-II** was synthesised according to **GP4** by using 2,4-lutidine (0.14 mL, 1.2 mmol), *O*-(2,4-dinitrophenyl)hydroxylamine **23** (272 mg, 1.4 mmol) in THF:H<sub>2</sub>O (1:1, 0.5 mL) and benzoyl chloride (0.22 mL, 1.8 mmol). The crude mixture was purified by flash column chromatography [Hexane:EtOAc (5:5)-MeOH] to yield a yellow oil. Recrystallisation with Hexane/Et<sub>2</sub>O afforded the formation of yellow needles (107 mg, 40%); mp. 128-130 °C; <sup>1</sup>H-NMR (300 MHz, CDCl<sub>3</sub>) δ 8.19-8.12 (m, 2H), 7.79-7.71 (m, 1H), 7.47-7.36 (m, 5H), 2.65 (s, 6H); <sup>13</sup>C-NMR (101 MHz, CDCl<sub>3</sub>) δ 169.1 (C), 154.8 (C), 137.4 (CH), 130.0 (CH), 128.1 (2 × CH), 125.4 (2 × CH), 109.5 (2 × CH), 109.4 (2 × C), 20.0 (2 × CH<sub>3</sub>); MS (ES): m/z 227.2 ([M+H], 100%).

Data matches that reported in the literature.<sup>24a,b</sup>

***Benzoyl(quinolin-1-ium-1-yl)amide (2a-III)***

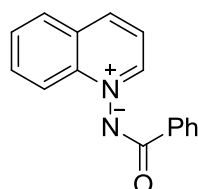

Ylide **2a-III** was synthesised according to **GP4** using quinoline (0.15 mL, 1.2 mmol) and the *O*-(2,4-dinitrophenyl)hydroxylamine **23** (272 mg, 1.4 mmol) in THF:H<sub>2</sub>O (1:1, 0.5 mL). After the addition of base and benzoyl chloride (0.22 mL, 1.8 mmol) the reaction mixture was stirred for 8 h. The crude mixture was purified by flash column chromatography [Hexane:EtOAc (5:5)-MeOH] to yield a brown solid (116 mg, 40%); mp. 155-158 °C; <sup>1</sup>H-NMR (300 MHz, CDCl<sub>3</sub>) δ 9.16 (dd, *J* = 5.9, 1.2 Hz, 1H), 8.78 (d, *J* = 8.6 Hz, 1H), 8.42 (d, *J* = 8.6 Hz, 1H), 8.34-8.25 (m, 2H), 8.01 (dd, *J* = 8.3, 1.2 Hz, 1H), 7.94-7.85 (m, 1H), 7.76 (ddd, *J* = 8.1, 5.7, 1.1 Hz, 1H), 7.68 (dd, *J* = 8.3, 5.9 Hz, 1H), 7.52-7.41 (m, 3H); <sup>13</sup>C-NMR (101 MHz, CDCl<sub>3</sub>) δ 170.5 (C), 145.9 (CH), 139.9 (C), 138.2 (CH), 137.5 (C), 133.4 (CH), 130.2 (CH), 130.3 (C), 129.5 (CH), 128.7 (CH), 128.3 (2 × CH), 128.0 (2 × CH), 120.6 (2 × CH); MS (ES): m/z 271.1 ([M+Na], 100%).

Data matches that reported in the literature.<sup>24a,b</sup>

**Benzoyl(3-bromopyridin-1-ium-1-yl)amide (2a-IV)**

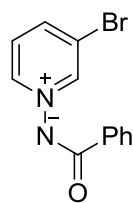

Ylide **2a-IV** was synthesised according to **GP4** using 3-bromopyridine (0.12 mL, 1.2 mmol), the *O*-(2,4-dinitrophenyl)hydroxylamine **23** (272 mg, 1.4 mmol) in THF:H<sub>2</sub>O (1:1, 0.5 mL) and benzoyl chloride (0.215 mL, 1.8 mmol). The crude mixture was purified by flash column chromatography [Hexane:EtOAc (5:5)-MeOH] to afford a yellow solid (186 mg, 54%); mp. 121-123 °C; <sup>1</sup>H-NMR (300 MHz, CDCl<sub>3</sub>) δ 9.20 (bs, 1H), 8.84 (d, *J* = 6.4, 1H), 8.15 (dd, *J* = 8.0, 1.6 Hz, 2H), 8.00 (d, *J* = 8.3 Hz, 1H), 7.54 (dd, *J* = 8.3, 6.4 Hz, 1H), 7.51-7.36 (m, 3H); <sup>13</sup>C-NMR (101 MHz, CDCl<sub>3</sub>) δ 171.8 (C), 144.5 (CH), 141.5 (CH), 139.0 (CH), 136.9 (C), 130.6 (CH), 128.5 (2 × CH), 128.2 (2 × CH), 126.2 (CH), 120.9 (C); MS (ES): *m/z* 279.0 ([M+H], 100%).

Data matches that reported in the literature.<sup>24a,b</sup>

**Benzoyl(4-methylpyridin-1-ium-1-yl)amide (2a-V)**

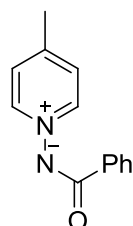

Ylide **2a-V** was synthesised according to **GP4** using 4-picoline (0.12 mL, 1.2 mmol), the *O*-(2,4-dinitrophenyl)hydroxylamine **23** (272 mg, 1.4 mmol) in THF:H<sub>2</sub>O (1:1, 5 mL) and benzoyl chloride (0.22 mL, 1.8 mmol). The crude mixture was purified by flash column chromatography [Hexane:EtOAc (5:5)-MeOH] to afford an orange solid (150 mg, 57%); mp. 65-67 °C; <sup>1</sup>H-NMR (300 MHz, CDCl<sub>3</sub>) δ 8.61 (d, *J* = 5.8 Hz, 2H), 8.22-7.97 (m, 2H), 7.53-7.32 (m, 5H), 2.57 (s, 3H); <sup>13</sup>C-NMR (400 MHz, CDCl<sub>3</sub>) δ 171.2 (C), 150.2 (C), 143.0 (2 × CH), 137.4 (C), 130.2 (2 × CH), 128.1 (2 × CH), 126.5 (2 × CH), 126.6 (CH), 21.5 (CH<sub>3</sub>); MS (ES): *m/z* 213.1 ([M+H], 100%).

Data matches that reported in the literature.<sup>37</sup>

**Reaction optimisation survey:**

The free indole derivative **1a** reacted to give **3aa** in low yield and conversion using a Au(III) precatalyst Au-**S-I** (Supplementary Table 1, Entry 1). The use of more electrophilic cationic gold(I) species, generated *in situ* from ligated gold chloride and silver triflate led to improved conversion with a variety of ligands (Table 1, Entries 2-5).

**Supplementary Table 1** Full reaction study screening.

1a (1.0 equiv.) + 2a(I-V) (1.5 equiv.)  
Catalyst (5 mol%)  
solvent, T °C  
24 h

3aa

| Entry | Catalyst                    | 2a  | C (M) | Solvent          | T (°C) | 3aa (%) <sup>a</sup>               |
|-------|-----------------------------|-----|-------|------------------|--------|------------------------------------|
| 1     | Au-I                        | I   | 0.1   | Toluene          | 90     | 12                                 |
| 2     | Ph <sub>3</sub> PAuCl/AgOTf | I   | 0.1   | Toluene          | 90     | 24                                 |
| 3     | Au-IV/AgOTf                 | I   | 0.1   | Toluene          | 90     | 37                                 |
| 4     | Au-II/AgOTf                 | I   | 0.1   | Toluene          | 90     | 38                                 |
| 5     | Au-V/AgOTf                  | I   | 0.1   | Toluene          | 90     | 46                                 |
| 6     | Au-II/AgOTf                 | I   | 0.05  | Toluene          | 90     | 35                                 |
| 7     | Au-II/AgOTf                 | I   | 0.2   | Toluene          | 90     | 54                                 |
| 8     | Au-II/AgNTf <sub>2</sub>    | I   | 0.2   | Toluene          | 90     | 44                                 |
| 9     | Au-II/AgOTs                 | I   | 0.2   | Toluene          | 90     | 37                                 |
| 10    | Au-II/AgBF <sub>4</sub>     | I   | 0.2   | Toluene          | 90     | 41                                 |
| 11    | Au-II/AgSbF <sub>6</sub>    | I   | 0.2   | Toluene          | 90     | 58                                 |
| 12    | Au-V/AgOTf                  | I   | 0.2   | <i>m</i> -Xylene | 120    | 65                                 |
| 13    | Au-V/AgSbF <sub>6</sub>     | I   | 0.2   | <i>m</i> -Xylene | 120    | 61                                 |
| 14    | Au-II/AgSbF <sub>6</sub>    | I   | 0.2   | <i>m</i> -Xylene | 120    | 73 (64 <sup>b</sup> )              |
| 15    | -                           | I   | 0.2   | <i>m</i> -Xylene | 120    | 0                                  |
| 16    | TfOH                        | I   | 0.2   | <i>m</i> -Xylene | 120    | 0 <sup>c</sup>                     |
| 17    | AgSbF <sub>6</sub>          | I   | 0.2   | <i>m</i> -Xylene | 120    | 25                                 |
| 18    | Au-II                       | I   | 0.2   | <i>m</i> -Xylene | 120    | 61                                 |
| 19    | Au-III                      | I   | 0.2   | <i>m</i> -Xylene | 120    | 78 <sup>d</sup> (48 <sup>e</sup> ) |
| 20    | Au-III                      | I   | 0.2   | <i>p</i> -Xylene | 120    | 63                                 |
| 21    | Au-III                      | I   | 0.2   | <i>o</i> -Xylene | 120    | 76                                 |
| 22    | Au-III                      | II  | 0.2   | <i>m</i> -Xylene | 120    | 21                                 |
| 23    | Au-III                      | III | 0.2   | <i>m</i> -Xylene | 120    | 18                                 |
| 24    | Au-III                      | IV  | 0.2   | <i>m</i> -Xylene | 120    | 75                                 |
| 25    | Au-III                      | V   | 0.2   | <i>m</i> -Xylene | 120    | 50                                 |

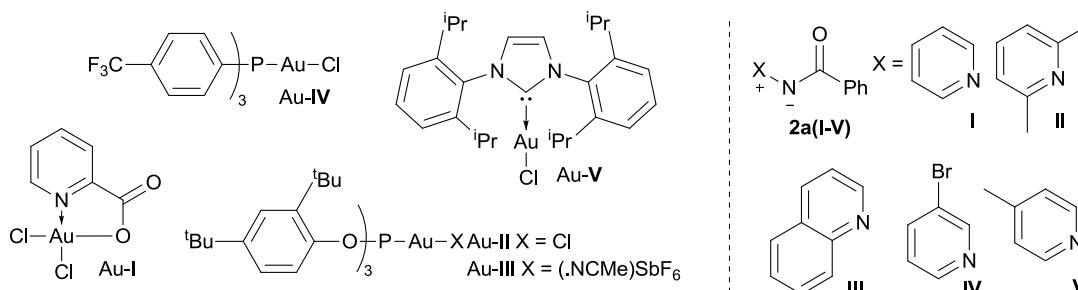

<sup>a</sup> Isolated yields after flash chromatography. <sup>b</sup> 2a (1.0 equiv). <sup>c</sup> immediate degradation of the starting material at 5 mol% loading. <sup>d</sup> average yield across 3 runs. <sup>e</sup> 1 mol% catalyst loading.

Higher concentration (Entry 7 vs. 4 and 6) proved beneficial, with triflate or hexafluoroantimonate the most effective of the counterions tested (Entries 7-11).

Conversion and product yield were increased at higher temperature in *m*-xylene, with the phosphite gold complex Au-III affording better yields than the carbene-gold complex Au-IV (Entries 12-14). Comparable results were seen in *o*- and *m*-xylene whilst *p*-xylene gave a less clean reaction and a lower yield (Entries 19-21).

### **Formation of 2,4,5-trisubstituted oxazoles 3(a-l)(a-f), 5(a-e)a and 7**

#### **General Procedure 5 (GP5)**

Initially, the internal alkyne (1.0 equiv), the pyridinium ylide (1.5 equiv) and the gold complex Au-III were combined in a Schlenk tube; *m*-xylene (0.2M) was added and the reaction mixture was stirred at 120 °C for 24 h. The reactions were monitored by TLC until 8 h showing the formation of the product and unreacted starting material. After 24 h (TLC indicates either consumption of the starting material or trace of it) the reaction mixture was cooled to room temperature and concentrated under reduced pressure. The crude residue was purified by silica gel flash column chromatography (Toluene:EtOAc) to afford the pure oxazole.

#### **4-(1H-Indol-3-yl)-2,5-diphenyloxazole (3aa)**

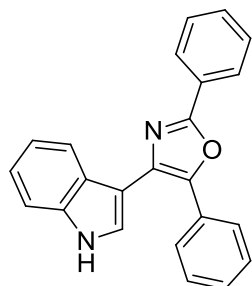

Oxazole **3aa** was synthesised according to **GP5** using indole derivative **1a** (44 mg, 0.2 mmol, 1.0 equiv) and ylide **2a** (59 mg, 0.3 mmol, 1.5 equiv). After purification with flash column chromatography [Toluene:EtOAc (9:1)] the oxazole was isolated as a brown solid (52 mg, 78%); mp. 150-153 °C; <sup>1</sup>H-NMR (300 MHz, DMSO-d<sub>6</sub>) δ 11.4 (bs, 1H), 8.17-8.09 (m, 2H), 7.73-7.70 (m, 2H), 7.70 (s, 1H), 7.62-7.55 (m, 3H), 7.48 (d, *J* = 8.1 Hz, 1H), 7.46-7.38 (m, 3H), 7.37-7.32 (m, 1H), 7.16 (app. td, *J* = 7.5, 1.0 Hz, 1H), 7.00 (app. td, *J* = 7.5, 0.7 Hz, 1H); <sup>13</sup>C-NMR (101 MHz, DMSO-d<sub>6</sub>) δ 159.1 (C), 144.2 (C), 136.2 (C), 131.9 (C), 130.6 (CH), 129.2 (2 × CH), 128.7 (2 × CH), 128.6 (C), 128.1 (CH), 126.9 (C), 126.0 (2 × CH), 125.5 (2 × CH), 125.4 (C), 125.1 (CH), 121.6 (CH), 120.1 (CH), 119.3 (CH), 111.9 (CH), 106.5 (C); HRMS (ES) calcd. for C<sub>23</sub>H<sub>16</sub>N<sub>2</sub>ONa: 359.1160, found: 359.1165 [M+Na]<sup>+</sup>; IR ν<sub>max</sub>/cm<sup>-1</sup> 3412, 2925, 2856, 1628, 1487, 1448, 1344, 1248, 1097, 1016, 934, 744, 700.

When run at 0.4 mmol scale the oxazole was afforded in 79% (106 mg).

**4-(1-Methyl-1H-indol-3-yl)-2,5-diphenyloxazole (3ba)**

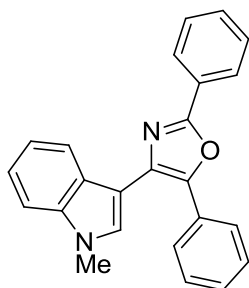

Oxazole **3ba** was synthesised according to **GP5** using indole derivative **1b** (69 mg, 0.3 mmol, 1.0 equiv) and ylide **2a** (89 mg, 0.45 mmol, 1.5 equiv). After purification with flash column chromatography [Toluene:EtOAc (9:1)] the oxazole was isolated as a brown solid (61 mg, 58%); mp. 158-160 °C;  $^1\text{H-NMR}$  (300 MHz,  $\text{CDCl}_3$ )  $\delta$  7.97 (dd,  $J = 7.6, 1.9$  Hz, 2H), 7.53-7.44 (m, 2H), 7.33-7.27 (m, 4H), 7.17 (m, 1H), 7.25-7.23 (d,  $J = 8.2$  Hz, 5H), 6.85 (t,  $J = 7.5$  Hz, 1H), 3.65 (s, 3H);  $^{13}\text{C-NMR}$  (101 MHz,  $\text{CDCl}_3$ )  $\delta$  160.1 (C), 145.1 (C), 137.3 (C), 131.6 (C), 130.4 (CH), 129.4 (C), 128.9 (2  $\times$  CH), 128.8 (CH), 128.6 (2  $\times$  CH), 128.0 (CH), 127.6 (C), 126.6 (2  $\times$  CH), 126.4 (C), 126.0 (2  $\times$  CH), 122.1 (CH), 121.5 (CH), 120.0 (CH), 109.5 (CH), 107.2 (C), 33.2 ( $\text{CH}_3$ ); HRMS (ES) calcd. for  $\text{C}_{24}\text{H}_{19}\text{N}_2\text{O}$ : 351.1497, found: 351.1486  $[\text{M}+\text{H}]^+$ ; IR  $\nu_{\text{max}}/\text{cm}^{-1}$  3381, 2206, 1414, 1359, 1324, 1235, 740, 681.

**4-(1-Benzyl-1H-indol-3-yl)-2,5-diphenyloxazole (3ca)**

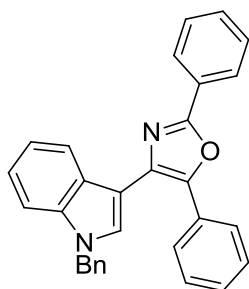

Oxazole **3ca** was synthesised according to **GP5** using indole derivative **1c** (62 mg, 0.2 mmol, 1.0 equiv) and ylide **2a** (59 mg, 0.3 mmol, 1.5 equiv). After purification with flash column chromatography [Toluene:EtOAc (9:1)] the oxazole was isolated as a yellow solid (30 mg, 35%); mp. 220-222 °C;  $^1\text{H-NMR}$  (300 MHz,  $\text{CDCl}_3$ )  $\delta$  8.21 (dd,  $J = 7.9, 1.7$  Hz, 2H), 7.72 (dd,  $J = 8.2, 1.3$  Hz, 2H), 7.62 (bd,  $J = 8.2$  Hz, 1H), 7.54 (s, 1H), 7.42-7.56 (m, 3H), 7.38-7.28 (m, 7H), 7.25-7.19 (m, 3H), 7.10 (app. td,  $J = 7.6, 1.0$  Hz, 1H), 5.4 (s, 2H);  $^{13}\text{C-NMR}$  (101 MHz,  $\text{CDCl}_3$ )  $\delta$  160.1 (C), 145.2 (C), 137.2 (C), 136.8 (C), 131.8 (C), 130.3 (CH), 129.4 (C), 129.0 (2  $\times$  CH), 128.9 (2  $\times$  CH), 128.6 (2  $\times$  CH), 128.1 (CH), 128.0 (CH), 127.9 (CH), 127.8 (C), 127.1 (2  $\times$  CH), 126.9 (C), 126.6 (2  $\times$  CH), 126.0 (2  $\times$  CH), 122.4 (CH), 121.6 (CH), 120.3 (CH), 110.0 (CH), 108.0 (C), 50.4 ( $\text{CH}_2$ ); HRMS (ES) calcd. for  $\text{C}_{30}\text{H}_{23}\text{N}_2\text{O}$ : 427.1810, found: 427.1815  $[\text{M}+\text{H}]^+$ ; IR  $\nu_{\text{max}}/\text{cm}^{-1}$  3284, 1603, 1333, 1191, 1012, 770, 739, 695.

**5-(Furan-2-yl)-4-(1H-indol-3-yl)-2-phenyloxazole (3da)**

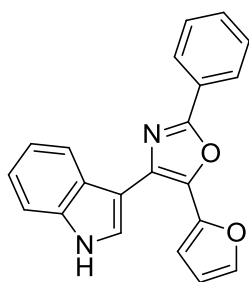

Oxazole **3da** was synthesised according to **GP5** using indole derivative **1d** (42 mg, 0.2 mmol, 1.0 equiv) and ylide **2a** (59 mg, 0.3 mmol, 1.5 equiv). After purification with flash column chromatography [Toluene:EtOAc (9:1)] the oxazole was isolated as a brown solid (44 mg, 67%); mp. 180-183 °C;  $^1\text{H-NMR}$  (300 MHz, DMSO- $d_6$ )  $\delta$  11.52 (bs, NH), 8.19-8.07 (m, 3H), 7.98 (d,  $J$  = 2.8 Hz, 1H), 7.92 (dd,  $J$  = 1.8, 0.7 Hz, 1H), 7.66-7.56 (m, 2H), 7.50-7.45 (m, 1H), 7.24-7.23 (m, 1H), 7.17 (dd,  $J$  = 8.1, 1.2 Hz, 1H), 7.11 (dd,  $J$  = 8.1 Hz, 1.1 Hz, 1H), 6.93 (dd,  $J$  = 3.4, 0.7 Hz, 1H), 6.73 (dd,  $J$  = 3.4, 1.8 Hz, 1H);  $^{13}\text{C-NMR}$  (101 MHz, DMSO- $d_6$ )  $\delta$  159.0 (C), 143.2 (C), 143.6 (CH), 136.2 (C), 135.8 (C), 132.9 (C), 130.8 (CH), 126.5 (C), 129.2 (2  $\times$  CH), 126.1 (2  $\times$  CH), 125.9 (C), 125.2 (CH), 121.7 (CH), 121.0 (CH), 119.6 (CH), 112.0 (CH), 111.7 (CH), 109.0 (CH), 106.0 (C); HRMS (ES) calcd. for  $\text{C}_{21}\text{H}_{15}\text{N}_2\text{O}_2$ : 327.1134, found: 327.1144  $[\text{M}+\text{H}]^+$ ; IR  $\nu_{\text{max}}/\text{cm}^{-1}$  3675, 2972, 2901, 1607, 1493, 1456, 1068, 746, 737.

When run at 0.5 mmol scale the oxazole was afforded in 72% (166 mg).

**4-(1H-Indol-3-yl)-2-phenyl-5-(thiophen-2-yl)oxazole (3ea)**

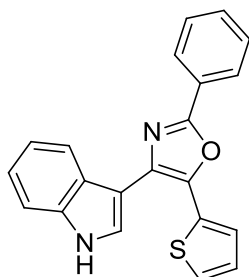

Oxazole **3ea** was synthesised according to **GP5** using indole derivative **1e** (45 mg, 0.2 mmol, 1 equiv) and ylide **2a** (59 mg, 0.3 mmol, 1.5 equiv). After purification with flash column chromatography [Toluene:EtOAc (9:1)] the oxazole was isolated as a brown solid (46 mg, 67%); mp. 180-183 °C;  $^1\text{H-NMR}$  (300 MHz, DMSO- $d_6$ )  $\delta$  11.53 (bs, NH), 8.11 (dd,  $J$  = 7.5, 1.7 Hz, 1H), 7.80 (d,  $J$  = 2.6 Hz, 1H), 7.67 (d,  $J$  = 8.0 Hz, 1H), 7.62 (dd,  $J$  = 5.1, 1.0 Hz, 1H), 7.61-7.55 (m, 3H), 7.49 (d,  $J$  = 8.0 Hz, 1H), 7.45 (dd,  $J$  = 3.6, 1.0 Hz, 1H), 7.27-7.18 (m, 3H), 7.11 (app. td,  $J$  = 7.5, 0.8 Hz, 1H);  $^{13}\text{C-NMR}$  (101 MHz, DMSO- $d_6$ )  $\delta$  158.8 (C), 140.2 (C), 136.2 (C), 131.7 (C), 130.7 (CH), 129.5 (C), 129.2 (2  $\times$  CH), 128.9 (C), 128.2 (C), 127.8 (CH), 126.7 (CH), 126.0 (2  $\times$  CH), 125.8 (CH), 125.3 (CH), 121.7 (CH), 120.3 (CH), 119.5 (CH), 111.7 (CH), 105.6 (C); HRMS (ES) calcd. for  $\text{C}_{21}\text{H}_{14}\text{N}_2\text{OSNa}$ : 365.0725, found: 365.0724  $[\text{M}+\text{Na}]^+$ ; IR  $\nu_{\text{max}}/\text{cm}^{-1}$  3203, 1628, 1611, 1541, 1189, 850, 744, 697 678.

**4-(1-Allyl-1H-indol-3-yl)-2-phenyl-5-(thiophen-2-yl)oxazole (3fa)**

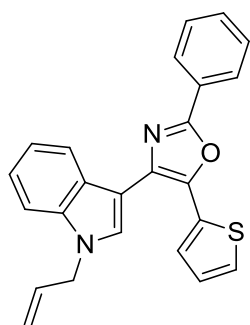

Oxazole **3fa** was synthesised according to **GP5** using indole derivative **1f** (53 mg, 0.2 mmol, 1.0 equiv) and ylide **2a** (59 mg, 0.3 mmol, 1.5 equiv). After purification with flash column chromatography (Toluene) the oxazole was isolated as a yellow viscous oil (26 mg, 34%, ~90% purity);  $^1\text{H-NMR}$  (300 MHz,  $\text{CDCl}_3$ )  $\delta$  8.18 (dd,  $J = 7.6, 2.1$  Hz, 2H), 7.70 (d,  $J = 7.8$  Hz, 1H), 7.57 (s, 1H), 7.54-7.49 (m, 3H), 7.38 (d,  $J = 8.2$  Hz, 1H), 7.32-7.27 (m, 2H), 7.14 (app. td,  $J = 7.5, 0.9$  Hz, 1H), 7.02 (dd,  $J = 5.1, 3.7$  Hz, 1H), 6.05 (ddt,  $J = 17.0, 10.5, 5.4$  Hz, 1H), 5.26 (dd,  $J = 10.5, 1.2$  Hz, 1H), 5.18 (dd,  $J = 17.0, 1.2$  Hz, 1H), 4.81 (dt,  $J = 5.4$  Hz, 1.4 Hz, 2H);  $^{13}\text{C-NMR}$  (101 MHz,  $\text{CDCl}_3$ )  $\delta$  159.8 (C), 141.3 (C), 137.9 (C), 136.7 (C), 133.3 (CH), 130.8 (C), 130.4 (CH), 128.9 (2  $\times$  CH), 128.0 (CH), 127.5 (CH), 126.9 (C), 126.6 (2  $\times$  CH), 126.2 (C), 125.4 (CH), 125.3 (CH), 122.3 (CH), 121.5 (CH), 120.2 (CH), 117.9 ( $\text{CH}_2$ ), 109.9 (CH), 106.9 (C), 49.2 ( $\text{CH}_2$ ); HRMS (ES) calcd. for  $\text{C}_{24}\text{H}_{19}\text{N}_2\text{OS}$ : 383.1218, found: 383.1225  $[\text{M}+\text{H}]^+$ ; IR  $\nu_{\text{max}}/\text{cm}^{-1}$  3079, 2921, 1637, 1468, 1186, 923, 744, 690.

\*Attempts to remove final traces of toluene led to degradation of the product.

**4-(1H-Indol-3-yl)-5-(4-methoxyphenyl)-2-phenyloxazole (3ga)**

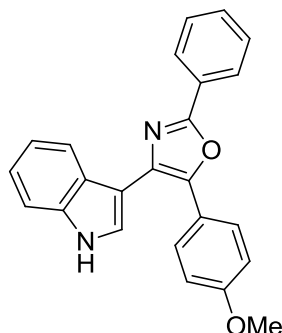

Oxazole **3ga** was synthesised according to **GP5** by using indole derivative **1g** (50 mg, 0.2 mmol, 1.0 equiv) and ylide **2a** (59 mg, 0.3 mmol, 1.5 equiv). After purification with flash column chromatography [Toluene:EtOAc (9:1)] the oxazole was isolated as a brown solid (60 mg, 82%); mp. 110-115  $^\circ\text{C}$ ;  $^1\text{H-NMR}$  (300 MHz,  $\text{DMSO-d}_6$ )  $\delta$  11.45 (bs, NH), 8.12 (dd,  $J = 7.9, 1.6$  Hz, 2H), 7.67 (d,  $J = 2.6$  Hz, 1H), 7.62 (d,  $J = 8.9$  Hz, 2H), 7.60-7.53 (m, 3H), 7.50-7.45 (m, 2H), 7.17 (app. td,  $J = 7.5, 0.9$  Hz, 1H), 7.02-6.98 (m, 1H), 6.98 (d,  $J = 8.9$  Hz, 2H), 3.78 (s, 3H);  $^{13}\text{C-NMR}$  (101 MHz,  $\text{DMSO-d}_6$ )  $\delta$  159.2 (C), 158.5 (C), 144.4 (C), 136.2 (C), 130.6 (C), 130.4 (CH), 129.2 (2  $\times$  CH), 127.3 (2  $\times$  CH), 127.0 (C), 125.9 (2  $\times$  CH), 125.6 (C), 124.8 (CH), 121.6 (CH), 121.2 (C), 120.2 (CH), 119.3 (CH), 114.3 (2  $\times$  CH), 111.8 (CH), 106.6 (C), 55.2 ( $\text{OCH}_3$ ); HRMS (ES) calcd. for  $\text{C}_{24}\text{H}_{19}\text{N}_2\text{O}_2$ : 367.1447, found: 367.1442  $[\text{M}+\text{H}]^+$ ; IR  $\nu_{\text{max}}/\text{cm}^{-1}$  3376, 2207, 1607, 1337, 1241, 1228, 1170, 743.

**5-(4-Fluorophenyl)-4-(1H-indol-3-yl)-2-phenyloxazole (3ha)**

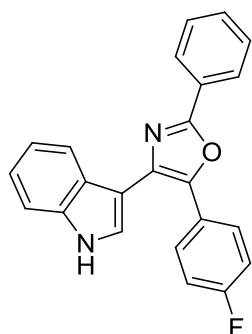

Oxazole **3ha** was synthesised according to **GP5** using indole derivative **1h** (47 mg, 0.2 mmol, 1.0 equiv) and ylide **2a** (59 mg, 0.3 mmol, 1.5 equiv). After purification with flash column chromatography [Toluene:EtOAc (9:1)] the oxazole was isolated as a brown solid (48 mg, 64%); mp. 158-160 °C;  $^1\text{H-NMR}$  (300 MHz, DMSO- $d_6$ )  $\delta$  8.45 (bs, NH), 8.22-8.14 (m, 2H), 7.70-7.63 (m, 2H), 7.56 (d,  $J$  = 2.6 Hz, 1H), 7.54-7.41 (m, 5H), 7.25-7.17 (m, 1H), 7.13-7.08 (m, 1H), 7.08-7.00 (m, 2H);  $^{13}\text{C-NMR}$  (101 MHz,  $\text{CDCl}_3$ )  $\delta$  163.7 (d,  $J_{\text{C-F}}$  = 245.9 Hz, *ipso*-C), 160.1 (C), 144.6 (C), 136.4 (C), 131.4 (C), 130.4 (CH), 128.9 (2  $\times$  CH), 127.9 (d,  $J_{\text{C-F}}$  = 8.1 Hz, *meta*-2  $\times$  CH), 127.7 (C), 126.6 (2  $\times$  CH), 125.9 (C), 125.6 (C), 124.1 (CH), 122.8 (CH), 121.2 (CH), 120.5 (CH), 115.7 (d,  $J_{\text{C-F}}$  = 22.1 Hz, *ortho*-2  $\times$  CH), 111.4 (CH), 108.8 (C); HRMS (ES) calcd. for  $\text{C}_{23}\text{H}_{16}\text{N}_2\text{OF}$ : 355.1247, found: 355.1243  $[\text{M}+\text{H}]^+$ ; IR  $\nu_{\text{max}}/\text{cm}^{-1}$  3254, 3062, 1491, 1228, 936, 838, 724.

**5-Cyclopropyl-4-(1H-indol-3-yl)-2-phenyloxazole (3ia)**

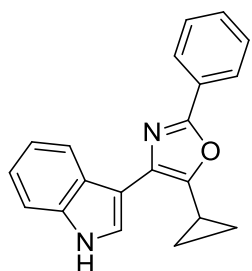

Oxazole **3ia** was synthesised according to **GP5** using indole derivative **1i** (56 mg, 0.3 mmol, 1.0 equiv) and ylide **2a** (89 mg, 0.45 mmol, 1.5 equiv). After purification with flash column chromatography [Toluene:EtOAc (9:1)] the oxazole was isolated as a brown solid (31 mg, 35%); mp. 150-152 °C;  $^1\text{H-NMR}$  (300 MHz,  $\text{CDCl}_3$ )  $\delta$  8.46 (bs, NH), 8.18 (dd,  $J$  = 6.9, 1.9 Hz, 1H), 8.08 (dd,  $J$  = 7.9, 1.9 Hz, 2H), 7.52-7.45 (m, 2H), 7.44-7.37 (m, 3H), 7.26-7.20 (m, 2H), 2.13 (tt,  $J$  = 7.2, 6.2 Hz, 1H), 1.21-1.02 (m, 4H);  $^{13}\text{C-NMR}$  (101 MHz,  $\text{CDCl}_3$ )  $\delta$  158.7 (C), 147.5 (C), 136.3 (C), 131.8 (C), 129.8 (CH), 128.7 (2  $\times$  CH), 128.1 (C), 126.6 (C), 126.2 (2  $\times$  CH), 122.9 (CH), 122.6 (CH), 121.3 (CH), 120.3 (CH), 111.2 (CH), 108.9 (C), 7.5 (2  $\times$   $\text{CH}_2$ ), 7.4 (CH); HRMS (ES) calcd. for  $\text{C}_{20}\text{H}_{17}\text{N}_2\text{O}$ : 301.1341, found: 301.1343  $[\text{M}+\text{H}]^+$ ; IR  $\nu_{\text{max}}/\text{cm}^{-1}$  3377, 3058, 1615, 1514, 1445, 1238, 766, 685.



**5-(2-Bromophenyl)-4-(1H-indol-3-yl)-2-phenyloxazole (3ja)**

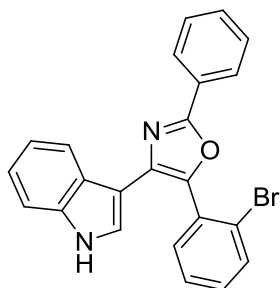

Oxazole **3ja** was synthesised according to **GP5** using indole derivative **1j** (60 mg, 0.2 mmol, 1.0 equiv) and ylide **2a** (59 mg, 0.3 mmol, 1.5 equiv). After purification with flash column chromatography [Toluene:EtOAc (9:1)] the oxazole was isolated as a brown solid (50 mg, 60%); mp. 56-58 °C;  $^1\text{H}$ -NMR (300 MHz,  $\text{CDCl}_3$ )  $\delta$  8.32 (bs, NH), 8.25-8.19 (m, 2H), 7.81 (d,  $J$  = 8.0 Hz, 1H), 7.75-7.71 (m, 1H), 7.52-7.46 (m, 3H), 7.34-7.25 (m, 4H), 7.22-7.16 (m, 2H), 7.11-7.06 (m, 1H);  $^{13}\text{C}$ -NMR (101 MHz,  $\text{CDCl}_3$ )  $\delta$  160.9 (C), 142.9 (C), 136.2 (C), 134.6 (C), 133.7 (CH), 132.5 (CH), 131.1 (C), 130.7 (CH), 130.4 (CH), 128.9 (2  $\times$  CH), 127.8 (C), 127.5 (CH), 126.7 (2  $\times$  CH), 125.9 (C), 124.2 (C), 123.4 (CH), 122.5 (CH), 121.4 (CH), 120.4 (CH), 111.2 (CH), 108.5 (C); HRMS (ES) calcd. for  $\text{C}_{23}\text{H}_{16}\text{N}_2\text{OBr}$ : 415.0446, found: 415.0439  $[\text{M}+\text{H}]^+$ ; IR  $\nu_{\text{max}}/\text{cm}^{-1}$  3403, 3057, 1484, 1335, 1092, 1026, 930, 742, 688.

**2-(2-Bromophenyl)-4-(1H-indol-3-yl)-5-phenyloxazole (3ab)**

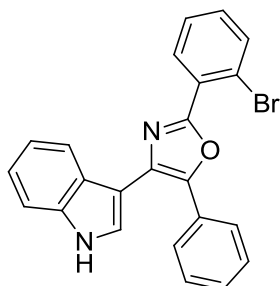

Oxazole **3ab** was synthesised according to **GP5** using indole derivative **1a** (44 mg, 0.2 mmol, 1.0 equiv) and ylide **2b** (83 mg, 0.3 mmol, 1.5 equiv). After purification with flash column chromatography [Toluene:EtOAc (9:1)] the oxazole was isolated as a brown solid (60 mg, 72%); mp. 198-200 °C;  $^1\text{H}$ -NMR (300 MHz,  $\text{CDCl}_3$ )  $\delta$  8.42 (bs, NH), 8.18 (dd,  $J$  = 7.8, 1.7 Hz, 1H), 7.88 (dd,  $J$  = 8.0, 1.3 Hz, 1H), 7.78-7.67 (m, 3H), 7.64-7.33 (m, 7H), 7.21-7.13 (m, 1H), 7.05-6.98 (m, 1H);  $^{13}\text{C}$ -NMR (101 MHz,  $\text{CDCl}_3$ )  $\delta$  158.6 (C), 145.9 (C), 136.2 (C), 134.6 (CH), 131.4 (CH), 131.4 (C), 131.0 (CH), 129.1 (C), 128.6 (2  $\times$  CH), 128.4 (C), 128.1 (CH), 127.4 (CH), 126.0 (2  $\times$  CH), 125.9 (C), 124.0 (CH), 122.6 (CH), 121.3 (CH), 121.0 (C), 120.4 (CH), 111.2 (CH), 108.7 (C); HRMS (ES) calcd. for  $\text{C}_{23}\text{H}_{16}\text{N}_2\text{OBr}$ : 415.0446, found: 415.0447  $[\text{M}+\text{H}]^+$ ; IR  $\nu_{\text{max}}/\text{cm}^{-1}$  3170, 2836, 1607, 1494, 1432, 1250, 1174, 1020, 831, 688.

**2-(2-Bromophenyl)-5-(4-fluorophenyl)-4-(1H-indol-3-yl)oxazole (3hb)**

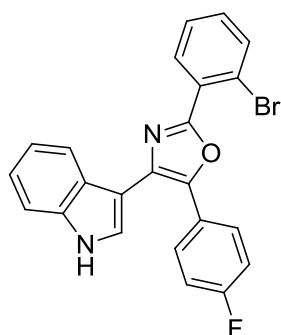

Oxazole **3hb** was synthesised according to **GP5** using indole derivative **1h** (47 mg, 0.2 mmol, 1.0 equiv) and ylide **2b** (83 mg, 0.3 mmol, 1.5 equiv). After purification with flash column chromatography [Toluene:EtOAc (9:1)] the oxazole was isolated as a light brown solid (59 mg, 68%); mp. 176-178 °C;  $^1\text{H-NMR}$  (300 MHz, DMSO- $d_6$ )  $\delta$  11.53 (bs, NH), 8.14 (dd,  $J$  = 8.0, 1.5 Hz, 1H), 7.86 (dd,  $J$  = 8.0, 0.7 Hz, 1H), 7.77-7.75 (m, 1H), 7.75-7.70 (m, 2H), 7.59 (td,  $J$  = 7.6, 1.0 Hz, 1H), 7.54 (d,  $J$  = 8.0 Hz, 1H), 7.52-7.45 (m, 2H), 7.31-7.25 (m, 2H), 7.14-7.19 (m, 1H), 7.02 (dd,  $J$  = 7.8, 7.2 Hz, 1H);  $^{13}\text{C-NMR}$  (101 MHz, DMSO- $d_6$ )  $\delta$  161.9 (d,  $J_{\text{C-F}}$  = 249.7 Hz, *ipso*-C), 157.7 (C), 143.7 (C), 136.2 (C), 134.5 (CH), 132.0 (CH), 131.6 (C), 131.3 (CH), 128.9 (C), 128.1 (CH), 128.0 (d,  $J_{\text{C-F}}$  = 8.4 Hz, *meta*-2  $\times$  CH), 127.5 (C), 125.5 (C), 125.1 (CH), 121.7 (CH), 120.2 (CH), 120.1 (C), 119.5 (CH), 115.9 (d,  $J_{\text{C-F}}$  = 21.5 Hz, *ortho*-2  $\times$  CH), 111.9 (CH), 105.9 (C); HRMS (ES) calcd. for  $\text{C}_{23}\text{H}_{15}\text{N}_2\text{OFBr}$ : 433.0352, found: 433.0354  $[\text{M}+\text{H}]^+$ ; IR  $\nu_{\text{max}}/\text{cm}^{-1}$  3257, 1627, 1492, 1228, 1163, 936, 838, 763, 724.

**5-(4-Bromophenyl)-4-(1H-indol-3-yl)-2-(4-methoxyphenyl)oxazole (3ac)**

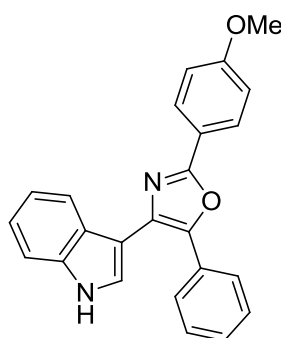

Oxazole **3ac** was synthesised according to **GP5** using indole derivative **1a** (44 mg, 0.2 mmol, 1.0 equiv) and ylide **2c** (69 mg, 0.3 mmol, 1.5 equiv). After purification with flash column chromatography [Toluene:EtOAc (9:1)] the oxazole was isolated as a yellow solid (58 mg, 79%); mp. 194-196 °C;  $^1\text{H-NMR}$  (300 MHz, DMSO- $d_6$ )  $\delta$  8.44 (bs, NH), 8.15 (d,  $J$  = 8.9 Hz, 2H), 7.68 (dd,  $J$  = 8.2, 1.4 Hz, 2H), 7.58 (d,  $J$  = 2.5 Hz, 1H), 7.53 (d,  $J$  = 8.0 Hz, 1H), 7.43 (d,  $J$  = 8.0 Hz, 1H), 7.38-7.28 (m, 3H), 7.25-7.19 (m, 1H), 7.12-7.05 (m, 1H), 7.01 (d,  $J$  = 8.9 Hz, 2H), 3.89 (s, 3H);  $^{13}\text{C-NMR}$  (101 MHz,  $\text{CDCl}_3$ )  $\delta$  161.5 (C), 160.2 (C), 157.6 (C), 144.9 (C), 142.6 (C), 136.4 (C), 129.5 (C), 128.6 (2  $\times$  CH), 128.3 (2  $\times$  CH), 127.9 (CH), 126.1 (C), 125.9 (2  $\times$  CH), 124.2 (CH), 122.8 (C), 122.6 (CH), 121.3 (CH), 120.4 (CH), 114.4 (2  $\times$  CH), 111.3 (CH), 108.9 (C), 55.6 ( $\text{OCH}_3$ ); HRMS (ES) calcd. for  $\text{C}_{24}\text{H}_{19}\text{N}_2\text{O}_2$ : 367.1447, found: 367.1441  $[\text{M}+\text{H}]^+$ ; IR  $\nu_{\text{max}}/\text{cm}^{-1}$  3079, 2920, 1637, 1465, 1186, 845, 743, 620.

**5-(2-Bromophenyl)-2-(4-fluorophenyl)-4-(1H-indol-3-yl)oxazole (3ad)**

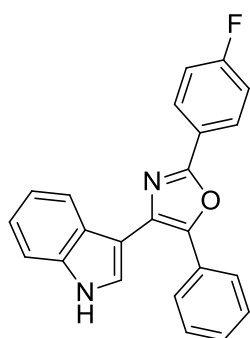

Oxazole **3ad** was synthesised according to **GP5** using indole derivative **1a** (44 mg, 0.2 mmol, 1.0 equiv) and ylide **2d** (65 mg, 0.3 mmol, 1.5 equiv). After purification with flash column chromatography [Toluene:EtOAc (9:1)] the oxazole was isolated as a brown solid (55 mg, 78%); mp. 162-164 °C;  $^1\text{H-NMR}$  (400 MHz,  $\text{CDCl}_3$ )  $\delta$  8.43 (bs, NH), 8.23-8.15 (m, 2H), 7.71-7.69 (m, 2H), 7.58-7.54 (m, 2H), 7.43 (d,  $J = 8.2$ , Hz, 1H), 7.39-7.27 (m, 3H), 7.27-7.16 (m, 3H), 7.10 (app. td,  $J = 7.5$ , 0.8 Hz, 1H);  $^{13}\text{C-NMR}$  (101 MHz,  $\text{CDCl}_3$ )  $\delta$  162.7 (d,  $J_{\text{C-F}} = 250.5$  Hz, *ipso*-C), 159.3 (C), 145.4 (C), 136.4 (C), 131.7 (C), 129.3 (2  $\times$  C), 128.8 (C), 128.7 (d,  $J_{\text{C-F}} = 8.1$  Hz, *meta*-2  $\times$  CH), 128.7 (2  $\times$  CH), 128.1 (CH), 126.0 (2  $\times$  CH), 124.1 (CH), 122.7 (CH), 121.3 (CH), 120.5 (CH), 116.2 (d,  $J_{\text{C-F}} = 22.3$  Hz, *ortho*-2  $\times$  CH), 111.4 (CH), 108.9 (C); HRMS (ES) calcd. for  $\text{C}_{23}\text{H}_{16}\text{N}_2\text{OF}$ : 355.1247, found: 355.1251  $[\text{M}+\text{H}]^+$ ; IR  $\nu_{\text{max}}/\text{cm}^{-1}$  3254, 2962, 1624, 1466, 1440, 1260, 1172, 737, 696.

**2,5-Bis(4-fluorophenyl)-4-(1H-indol-3-yl)oxazole (3hd)**

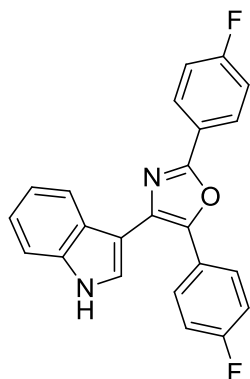

Oxazole **3hd** was synthesised according to **GP5** using indole derivative **1h** (47 mg, 0.2 mmol, 1.0 equiv) and ylide **2d** (65 mg, 0.3 mmol, 1.5 equiv). After purification with flash column chromatography [Toluene:EtOAc (9:1)] the oxazole was isolated as a brown solid (53 mg, 70%); mp. 192-194 °C;  $^1\text{H-NMR}$  (300 MHz,  $\text{DMSO-d}_6$ )  $\delta$  11.53 (bs, NH), 8.27-8.12 (m, 2H), 7.78-7.68 (m, 3H), 7.52-7.38 (m, 4H), 7.31-7.22 (m, 2H), 7.19-7.18 (m, 1H), 7.00 (app. t,  $J = 7.5$  Hz, 1H);  $^{13}\text{C-NMR}$  (101 MHz,  $\text{DMSO-d}_6$ )  $\delta$  163.8 (d,  $J_{\text{C-F}} = 250.1$  Hz, *ipso*-C), 161.3 (d,  $J_{\text{C-F}} = 250.5$  Hz, *ipso*-C), 143.5 (C), 136.2 (C), 131.7 (C), 129.1 (C), 128.5 (d,  $J_{\text{C-F}} = 8.0$  Hz, *meta*-2  $\times$  CH), 128.0 (d,  $J_{\text{C-F}} = 8.0$  Hz, *meta*-2  $\times$  CH), 126.0 (d,  $J_{\text{C-F}} = 3.0$  Hz, *para*-C), 125.4 (C), 125.0 (CH), 123.5 (d,  $J_{\text{C-F}} = 3.0$  Hz, *para*-C), 121.6 (CH), 120.0 (CH), 119.4 (CH), 116.3 (d,  $J_{\text{C-F}} = 21.9$  Hz, *meta*-2  $\times$  CH), 115.8 (d,  $J_{\text{C-F}} = 22.0$  Hz, *meta*-2  $\times$  CH), 111.9 (CH), 106.2 (C); HRMS (ES) calcd. for  $\text{C}_{23}\text{H}_{15}\text{N}_2\text{OF}_2$ : 373.1152, found: 373.1153  $[\text{M}+\text{H}]^+$ ; IR  $\nu_{\text{max}}/\text{cm}^{-1}$  3415, 1601, 1499, 1219, 1088, 928, 756, 663.

**2-(Furan-2-yl)-4-(1H-indol-3-yl)-5-phenyloxazole (3ae)**

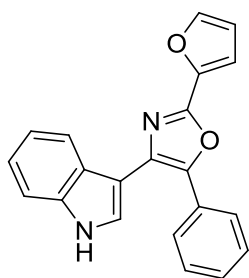

Oxazole **3ae** was synthesised according to **GP5** using indole derivative **1a** (65 mg, 0.3 mmol, 1.0 equiv) and ylide **2e** (84 mg, 0.45 mmol, 1.5 equiv). After purification with flash column chromatography [Toluene:EtOAc (9:1)] the oxazole was isolated as a brownish solid (81 mg, 83%); mp. 138-140 °C;  $^1\text{H-NMR}$  (300 MHz,  $\text{CDCl}_3$ )  $\delta$  8.49 (bs, 1H), 7.66 (dd,  $J$  = 8.1, 1.4 Hz, 2H), 7.60 (d,  $J$  = 1.3 Hz, 1H), 7.60 (d,  $J$  = 2.6 Hz, 1H), 7.42 (app. t,  $J$  = 8.3 Hz, 2H), 7.35-7.27 (m, 3H), 7.21 (app. td,  $J$  = 7.6, 0.9 Hz, 1H), 7.14 (dd,  $J$  = 3.4, 0.5 Hz, 1H), 7.06 (app. td,  $J$  = 7.6, 0.8 Hz, 1H), 6.53 (dd,  $J$  = 3.4, 1.8 Hz, 1H);  $^{13}\text{C-NMR}$  (101 MHz,  $\text{CDCl}_3$ )  $\delta$  153.1 (C), 144.9 (C), 144.5 (CH), 143.3 (C), 136.3 (C), 131.4 (C), 129.0 (C), 128.6 (2  $\times$  CH), 128.2 (CH), 126.1 (2  $\times$  CH), 125.8 (C), 124.5 (CH), 122.6 (CH), 121.3 (CH), 120.4 (CH), 112.1 (CH), 111.6 (CH), 111.4 (CH), 108.6 (C); HRMS (ES) calcd. for  $\text{C}_{21}\text{H}_{15}\text{N}_2\text{O}_2$ : 327.1134, found: 327.1137  $[\text{M}+\text{H}]^+$ ; IR  $\nu_{\text{max}}/\text{cm}^{-1}$  3398, 3057, 2924, 1625, 1447, 1067, 1010, 930, 739, 690.

**4-(1-Benzyl-1H-indol-3-yl)-5-phenyl-2-(thiophen-2-yl)oxazole (3ce)**

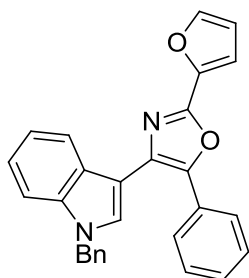

Oxazole **3ce** was synthesised according to **GP5** using indole derivative **1c** (62 mg, 0.2 mmol, 1.0 equiv) and ylide **2e** (56 mg, 0.3 mmol, 1.5 equiv). After purification with flash column chromatography [Toluene:EtOAc (9:1)] the oxazole was isolated as a brown solid (27 mg, 33%); mp. 124-126 °C;  $^1\text{H-NMR}$  (300 MHz,  $\text{CDCl}_3$ )  $\delta$  7.66 (dd,  $J$  = 8.1, 1.5 Hz, 2H), 7.60 (dd,  $J$  = 1.5, 0.7 Hz, 1H), 7.56 (s, 1H), 7.43 (d,  $J$  = 8.0 Hz, 1H), 7.36-7.31 (m, 3H), 7.32-7.27 (m, 4H), 7.23-7.16 (m, 3H), 7.13 (dd,  $J$  = 3.5, 0.6 Hz, 1H), 7.05 (app. td,  $J$  = 7.5, 1.0 Hz, 1H), 6.58 (dd,  $J$  = 3.5, 1.8 Hz, 1H), 5.37 (s, 2H);  $^{13}\text{C-NMR}$  (101 MHz,  $\text{CDCl}_3$ )  $\delta$  153.2 (C), 144.8 (C), 143.3 (C), 137.3 (C), 136.8 (C), 131.6 (C), 129.1 (C), 128.7 (2  $\times$  CH), 128.6 (2  $\times$  CH), 128.2 (CH), 128.0 (CH), 127.2 (2  $\times$  CH), 126.6 (C), 126.2 (2  $\times$  CH), 122.4 (CH), 121.7 (CH), 121.1 (CH), 120.3 (CH), 112.1 (CH), 111.7 (CH), 110.1 (CH), 144.6 (CH), 107.7 (C), 50.6 ( $\text{CH}_2$ ); HRMS (ES) calcd. for  $\text{C}_{28}\text{H}_{21}\text{N}_2\text{O}_2$ : 417.1603, found: 417.1607  $[\text{M}+\text{H}]^+$ ; IR  $\nu_{\text{max}}/\text{cm}^{-1}$  3255, 1624, 1528, 1469, 1442, 1099, 725, 690.

**4-(1H-Indol-3-yl)-5-phenyl-2-(thiophen-2-yl)oxazole (3af)**

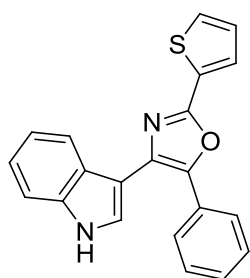

Oxazole **3af** was synthesised according to **GP5** using indole derivative **1a** (44 mg, 0.2 mmol, 1.0 equiv) and ylide **2f** (61 mg, 0.3 mmol, 1.5 equiv). After purification with flash column chromatography [Toluene:EtOAc (9:1)] the oxazole was isolated as a brownish solid (44 mg, 64%); mp. 167-170 °C;  $^1\text{H-NMR}$  (300 MHz, DMSO- $d_6$ )  $\delta$  11.53 (bs, NH), 7.91 (dd,  $J$  = 3.7, 1.1 Hz, 1H), 7.88 (dd,  $J$  = 5.0, 1.1 Hz, 1H), 7.71 (d,  $J$  = 2.5 Hz, 1H), 7.67-7.61 (m, 2H), 7.47 (d,  $J$  = 8.1 Hz, 1H), 7.43-7.33 (m, 4H), 7.28 (dd,  $J$  = 5.0, 4.0 Hz, 1H), 7.14 (app. td,  $J$  = 7.5, 1.0 Hz, 1H), 6.98 (app. td,  $J$  = 7.5, 1.0 Hz, 1H);  $^{13}\text{C-NMR}$  (101 MHz, DMSO- $d_6$ )  $\delta$  155.5 (C), 143.6 (C), 136.2 (C), 131.8 (C), 129.7 (CH), 129.1 (C), 128.9 (C), 128.7 (2  $\times$  CH), 128.6 (C), 128.4 (CH), 128.2 (2  $\times$  CH), 125.5 (2  $\times$  CH), 125.3 (CH), 121.6 (CH), 120.1 (CH), 119.4 (CH), 111.9 (CH), 106.2 (C); HRMS (ES) calcd. for  $\text{C}_{21}\text{H}_{14}\text{N}_2\text{ONaS}$ : 365.0725, found: 365.0720  $[\text{M}+\text{Na}]^+$ ; IR  $\nu_{\text{max}}/\text{cm}^{-1}$  3376, 3058, 1614, 1488, 1445, 1239, 825, 690.

**2-(Furan-2-yl)-4-(1H-indol-3-yl)-5-(4-methoxyphenyl)oxazole (3ge)**

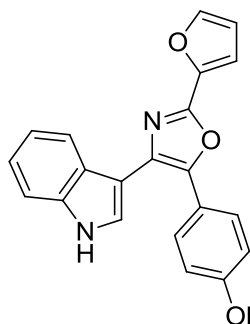

Oxazole **3ge** was synthesised according to **GP5** using indole derivative **1g** (50 mg, 0.2 mmol, 1.0 equiv) and ylide **2e** (56 mg, 0.3 mmol, 1.5 equiv). After purification with flash column chromatography [Toluene:EtOAc (9:1)] the oxazole was isolated as a brown solid (61 mg, 86%); mp. 90-93 °C;  $^1\text{H-NMR}$  (300 MHz,  $\text{CDCl}_3$ )  $\delta$  8.47 (bs, NH), 7.63-7.53 (m, 4H), 7.44-7.38 (m, 2H), 7.21 (app t,  $J$  = 7.7 Hz, 1H), 7.11 (dd,  $J$  = 3.4, 0.7 Hz, 1H), 7.05 (app t,  $J$  = 7.5 Hz, 1H), 6.89 (d,  $J$  = 8.9 Hz, 2H), 6.57 (d,  $J$  = 3.4, 1.7 Hz, 1H), 3.80 (s, 3H);  $^{13}\text{C-NMR}$  (101 MHz,  $\text{CDCl}_3$ )  $\delta$  159.6 (C), 152.6 (C), 145.0 (C), 144.3 (CH), 143.4 (C), 136.3 (C), 130.0 (C), 127.8 (2  $\times$  CH), 125.8 (C), 124.4 (CH), 122.5 (CH), 121.7 (C), 121.3 (CH), 120.3 (CH), 114.1 (2  $\times$  CH), 112.4 (CH), 112.0 (CH), 111.3 (CH), 108.8 (C), 55.4 ( $\text{OCH}_3$ ); HRMS (ES) calcd. for  $\text{C}_{22}\text{H}_{17}\text{N}_2\text{O}_3$ : 357.1239, found: 357.1229  $[\text{M}+\text{H}]^+$ ; IR  $\nu_{\text{max}}/\text{cm}^{-1}$  3373, 2107, 1407, 1236, 1222, 1215, 1170, 842, 750.

**4-(5-Bromo-1H-indol-3-yl)-2,5-diphenyloxazole (3ka)**

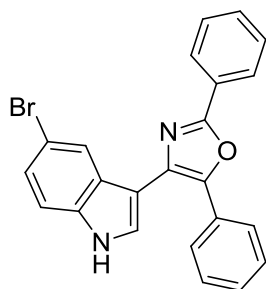

Oxazole **3ka** was synthesised according to **GP5** using indole derivative **1k** (59 mg, 0.2 mmol, 1.0 equiv) and ylide **2a** (59 mg, 0.3 mmol, 1.5 equiv). After purification with flash column chromatography [Toluene:EtOAc (9:1)] the oxazole was isolated as a yellow solid (33 mg, 40%); mp. 78-80 °C;  $^1\text{H-NMR}$  (300 MHz, DMSO- $d_6$ )  $\delta$  11.70 (bs, NH), 8.14 (dd,  $J = 7.8, 1.7$  Hz, 2H), 7.77 (d,  $J = 2.6$  Hz, 1H), 7.72-7.68 (m, 2H), 7.63 (d,  $J = 1.7$  Hz, 1H), 7.61-7.56 (m, 2H), 7.48-7.41 (m 3H), 7.27 (dd,  $J = 8.4, 1.7$  Hz, 1H), 7.26-7.21 (m, 2H);  $^{13}\text{C-NMR}$  (101 MHz,  $\text{CDCl}_3$ )  $\delta$  160.3 (C), 145.7 (C), 135.0 (C), 131.0 (C), 130.5 (CH), 129.8 (C), 129.1 (C), 129.0 (2  $\times$  CH), 128.9 (2  $\times$  CH), 128.4 (CH), 127.6 (C), 126.6 (2  $\times$  CH), 126.1 (2  $\times$  CH), 125.7 (CH), 125.0 (CH), 123.9 (CH), 113.4 (C), 112.8 (CH), 108.7 (C); HRMS (ES) calcd. for  $\text{C}_{23}\text{H}_{16}\text{N}_2\text{OBr}$ : 415.0446, found: 415.0454  $[\text{M}+\text{H}]^+$ ; IR  $\nu_{\text{max}}/\text{cm}^{-1}$  2922, 2852, 1592, 1447, 1260, 1070, 796, 690.

**4-(5-Bromo-1H-indol-3-yl)-5-phenyl-2-(thiophen-2-yl)oxazole (3kf)**

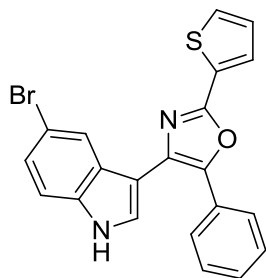

Oxazole **3kf** was synthesised according to **GP5** using indole derivative **1k** (59 mg, 0.2 mmol, 1.0 equiv) and ylide **2f** (61 mg, 0.3 mmol, 1.5 equiv). After purification with flash column chromatography [Toluene:EtOAc (9:1)] the oxazole was isolated as a yellow solid (57 mg, 68%); mp. 180-182 °C;  $^1\text{H-NMR}$  (300 MHz, DMSO- $d_6$ )  $\delta$  11.70 (bs, NH), 7.88-7.84 (m, 1H), 7.83 (bs, 1H), 7.76 (d,  $J = 1.6$  Hz, 1H), 7.65 (dd,  $J = 8.2, 1.6$  Hz, 2H), 7.56 (bs, 1H), 7.47-7.38 (m, 4H), 7.30-7.25 (m, 2H);  $^{13}\text{C-NMR}$  (101 MHz, DMSO- $d_6$ )  $\delta$  155.7 (C), 143.8 (C), 134.9 (C), 131.1 (C), 129.8 (CH), 129.0 (C), 128.8 (2  $\times$  CH), 128.6 (CH), 128.5 (CH), 128.3 (CH), 127.7 (C), 127.2 (C), 126.7 (CH), 125.7 (2  $\times$  CH), 124.2 (CH), 122.4 (CH), 114.0 (CH), 112.0 (C), 105.9 (C); HRMS (ES) calcd. for  $\text{C}_{21}\text{H}_{14}\text{N}_2\text{OSBr}$ : 421.0010, found: 421.0018  $[\text{M}+\text{H}]^+$ ; IR  $\nu_{\text{max}}/\text{cm}^{-1}$  3165, 2922, 1583, 1450, 1106, 884, 799, 705.

**2-(Furan-2-yl)-4-(1H-indol-3-yl)-5-(thiophen-2-yl)oxazole (3fe)**

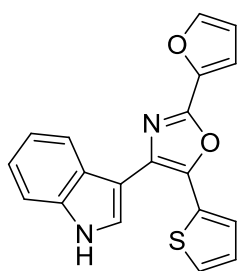

Oxazole **3fe** was synthesised according to **GP5** using indole derivative **1f** (45 mg, 0.2 mmol, 1.0 equiv) and ylide **2e** (56 mg, 0.3 mmol, 1.5 equiv). After purification with flash column chromatography [Toluene:EtOAc (9:1)] the oxazole was isolated as a yellow powder (47 mg, 71%); mp. 197-200 °C;  $^1\text{H-NMR}$  (300

MHz, DMSO- $d_6$ )  $\delta$  11.54 (bs, NH), 8.00 (d,  $J$  = 1.0 Hz, 1H), 7.79 (bd,  $J$  = 2.3 Hz, 1H), 7.65-7.58 (m, 2H), 7.48 (d,  $J$  = 8.2 Hz, 1H), 7.37 (dd,  $J$  = 3.5, 1.0 Hz, 1H), 7.28 (d,  $J$  = 3.5 Hz, 1H), 7.21-7.11 (m, 2H), 7.04 (app td,  $J$  = 7.4, 0.5 Hz, 1H), 6.77 (dd,  $J$  = 3.5, 1.8 Hz, 1H);  $^{13}\text{C-NMR}$  (101 MHz, DMSO- $d_6$ )  $\delta$  151.8 (C), 145.7 (CH), 141.9 (C), 139.4 (C), 136.2 (C), 131.5 (C), 129.2 (C), 127.8 (CH), 126.9 (CH), 125.9 (CH), 125.6 (C), 125.5 (CH), 121.7 (CH), 120.2 (CH), 119.5 (CH), 112.5 (CH), 112.3 (CH), 111.9 (CH), 105.3 (C); HRMS (ES) calcd. for  $\text{C}_{19}\text{H}_{12}\text{N}_2\text{O}_2\text{NaS}$ : 355.0517, found: 355.0518  $[\text{M}+\text{Na}]^+$ ; IR  $\nu_{\text{max}}/\text{cm}^{-1}$  3143, 1613, 1523, 1455, 1071, 971, 743, 692.

**5-(Furan-2-yl)-4-(1H-indol-3-yl)-2-(thiophen-2-yl)oxazole (3ef)**

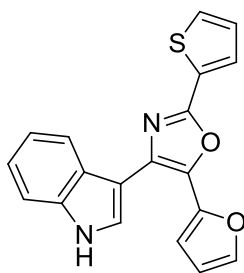

Oxazole **3ef** was synthesised according to **GP5** using indole derivative **1e** (42 mg, 0.2 mmol, 1.0 equiv) and ylide **2f** (61 mg, 0.3 mmol, 1.5 equiv). After purification with flash column chromatography [Toluene:EtOAc (9:1)] the oxazole was isolated as a brown solid (40 mg, 61%); mp. 157-160 °C;

$^1\text{H-NMR}$  (300 MHz, DMSO- $d_6$ )  $\delta$  11.51 (bs, NH), 7.97 (d,  $J$  = 8.0 Hz, 1H), 7.93 (d,  $J$  = 2.7 Hz, 1H), 7.90 (d,  $J$  = 1.5 Hz, 1H), 7.87-7.83 (m, 2H), 7.47 (d,  $J$  = 8.0 Hz, 1H), 7.28 (dd,  $J$  = 5.0, 3.5 Hz, 1H), 7.17 (app. td,  $J$  = 7.5, 1.0 Hz, 1H), 7.08 (app. td,  $J$  = 7.5, 1.0 Hz, 1H), 6.85 (d,  $J$  = 3.6 Hz, 1H), 6.71 (dd,  $J$  = 3.5, 1.5 Hz, 1H);  $^{13}\text{C-NMR}$  (101 MHz, DMSO- $d_6$ )  $\delta$  155.4 (C), 143.7 (CH), 143.0 (C), 136.1 (C), 135.2 (C), 132.8 (C), 130.1 (CH), 128.7 (C), 128.7 (CH), 128.4 (CH), 125.8 (C), 125.3 (CH), 121.7 (CH), 120.7 (CH), 119.6 (CH), 112.0 (CH), 111.8 (CH), 109.1 (CH), 105.3 (C); HRMS (ES) calcd. for  $\text{C}_{19}\text{H}_{13}\text{N}_2\text{O}_2\text{S}$ : 333.0698, found: 333.0695  $[\text{M}+\text{H}]^+$ ; IR  $\nu_{\text{max}}/\text{cm}^{-1}$  3379, 3145, 2929, 1607, 1455, 1242, 1072, 884, 742.

**Methyl 3-(2,5-diphenyloxazol-4-yl)-1H-indole-6-carboxylate (3la)**

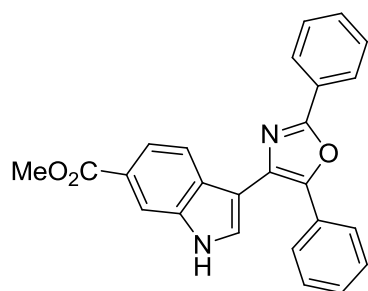

Oxazole **3la** was synthesised according to **GP5** using indole derivative **1l** (55 mg, 0.2 mmol, 1.0 equiv) and ylide **2a** (59 mg, 0.3 mmol, 1.5 equiv). After purification with flash column chromatography [Toluene:EtOAc (9:1)] the oxazole was isolated as a brown solid (62 mg, 79%); mp. 188-190 °C;  $^1\text{H-NMR}$  (300 MHz,  $\text{CDCl}_3$ )  $\delta$  8.99 (bs, NH), 8.22-8.18 (m, 2H), 8.17 (d,  $J = 1.1$  Hz, 1H), 7.77 (dd,  $J = 8.5, 1.1$  Hz, 1H), 7.69 (d,  $J = 2.7$  Hz, 1H), 7.68-7.64 (m, 2H), 7.56 (d,  $J = 8.5$  Hz, 1H), 7.54-7.45 (m, 3H), 7.36-7.28 (m, 3H), 3.93 (s, 3H);  $^{13}\text{C-NMR}$  (101 MHz,  $\text{CDCl}_3$ )  $\delta$  168.2 (C), 160.3 (C), 145.7 (C), 135.8 (C), 131.0 (C), 130.5 (CH), 129.5 (C), 129.1 (C), 129.0 (2  $\times$  CH), 128.8 (2  $\times$  CH), 128.3 (CH), 127.5 (CH), 127.6 (C), 126.6 (2  $\times$  CH), 126.1 (2  $\times$  CH), 124.4 (C), 121.4 (CH), 120.9 (CH), 113.9 (CH), 109.3 (C), 52.1 ( $\text{CH}_3$ ); HRMS (ES) calcd. for  $\text{C}_{25}\text{H}_{19}\text{N}_2\text{O}_3$ : 395.1396, found: 395.1397  $[\text{M}+\text{H}]^+$ ; IR  $\nu_{\text{max}}/\text{cm}^{-1}$  3376, 3231, 1712, 1504, 1290, 1248, 1028, 745, 690.

**Methyl 3-(2-(furan-2-yl)-5-phenyloxazol-4-yl)-1H-indole-6-carboxylate (3le)**

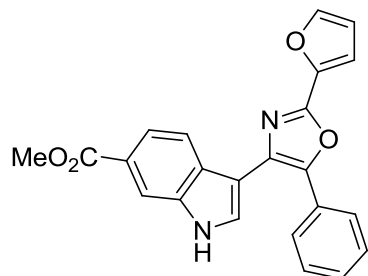

Oxazole **3la** was synthesised according to **GP5** using indole derivative **1l** (55 mg, 0.2 mmol, 1.0 equiv) and ylide **2e** (56 mg, 0.3 mmol, 1.5 equiv). After purification with flash column chromatography [Toluene:EtOAc (9:1)] the oxazole was isolated as a brown solid (45 mg, 59%); mp. 122-124 °C;  $^1\text{H-NMR}$  (300 MHz,  $\text{DMSO-d}_6$ )  $\delta$  11.92 (bs, NH), 8.15 (s, 1H), 7.94-7.76 (m, 2H), 7.70-7.56 (m, 3H), 7.48 (d,  $J = 7.9$  Hz, 1H), 7.44-7.33 (m, 3H), 7.31 (bs, 1H), 6.77 (bs, 1H), 3.86 (s, 3H);  $^{13}\text{C-NMR}$  (101 MHz,  $\text{DMSO-d}_6$ )  $\delta$  167.1 (C), 152.3 (C), 145.7 (CH), 143.8 (C), 142.0 (C), 135.5 (C), 130.9 (C), 129.1 (CH), 128.9 (2  $\times$  CH and C), 128.5 (CH), 128.1 (C), 125.7 (2  $\times$  CH), 122.8 (C), 120.0 (2  $\times$  CH), 114.0 (CH), 112.4 (CH), 112.3 (CH), 106.8 (C), 51.8 ( $\text{CH}_3$ ); HRMS (ES) calcd. for  $\text{C}_{23}\text{H}_{17}\text{N}_2\text{O}_4$ : 385.1188, found: 385.1186  $[\text{M}+\text{H}]^+$ ; IR  $\nu_{\text{max}}/\text{cm}^{-1}$  3219, 1704, 1437, 1290, 933, 741, 688.



**4-(2,5-Diphenyloxazol-4-yl)-N,N-dimethylaniline (5aa)**

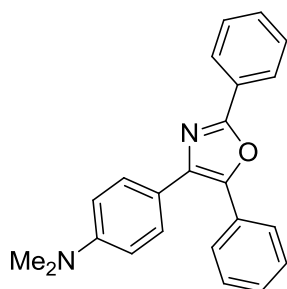

Oxazole **5aa** was synthesised according to **GP5** using aniline derivative **4a** (44 mg, 0.2 mmol, 1.0 equiv) and ylide **2a** (90 mg, 0.45 mmol, 2.25 equiv). The reaction mixture was quenched after 48 h. After purification with flash column chromatography (Toluene) the oxazole was isolated as a yellow powder (43 mg, 63%); mp. 128-130 °C;  $^1\text{H-NMR}$  (300 MHz,  $\text{CDCl}_3$ )  $\delta$  8.20-8.13 (m, 2H), 7.78-7.68 (m, 2H), 7.62 (d,  $J$  = 8.6 Hz, 2H), 7.51-7.45 (m, 3H), 7.43-7.30 (m, 3H), 6.76 (d,  $J$  = 8.6 Hz, 2H), 3.00 (s, 6H);  $^{13}\text{C-NMR}$  (101 MHz,  $\text{CDCl}_3$ )  $\delta$  160.0 (C), 150.5 (C), 144.3 (C), 137.5 (C), 130.2 (CH), 129.7 (C), 129.1 (2  $\times$  CH), 128.8 (2  $\times$  CH), 128.7 (2  $\times$  CH), 128.1 (CH), 127.8 (C), 126.6 (2  $\times$  CH), 126.4 (2  $\times$  CH), 120.5 (C), 112.4 (2  $\times$  CH), 40.6 (2  $\times$   $\text{CH}_3$ ); HRMS (ES) calcd. for  $\text{C}_{23}\text{H}_{20}\text{N}_2\text{ONa}$ : 363.1473, found: 363.1469  $[\text{M}+\text{Na}]^+$ ; IR  $\nu_{\text{max}}/\text{cm}^{-1}$  3691, 3619, 2919, 2852, 1607, 1455, 1242, 1008, 911, 692.

**4-(4-(2,5-Diphenyloxazol-4-yl)phenyl)morpholine (5ba)**

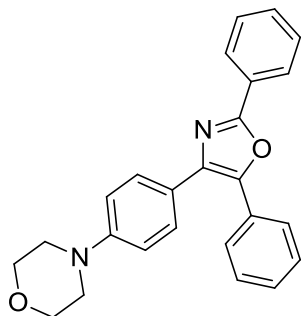

Oxazole **5ba** was synthesised according to **GP5** using aniline derivative **4b** (53 mg, 0.2 mmol, 1.0 equiv) and ylide **2a** (90 mg, 0.45 mmol, 2.25 equiv). The reaction mixture was quenched after 48 h. After purification with flash column chromatography [Toluene:EtOAc (9:1)] the oxazole was isolated as a yellow powder (45 mg, 59%); mp. 140-142 °C;  $^1\text{H-NMR}$  (300 MHz,  $\text{DMSO-d}_6$ )  $\delta$  8.13-8.06 (m, 2H) 7.72-7.66 (m, 2H), 7.61- 7.53 (m, 4H), 7.53-7.38 (m, 4H), 7.01 (d,  $J$  = 8.6 Hz, 2H), 3.79-3.70 (m, 4H), 3.22-3.14 (m, 4H);  $^{13}\text{C-NMR}$  (101 MHz,  $\text{DMSO-d}_6$ )  $\delta$  159.2 (C), 150.9 (C), 144.0 (C), 136.3 (C), 130.7 (CH), 129.1 (2  $\times$  CH), 128.9 (2  $\times$  CH), 128.7 (CH), 128.6 (C), 128.4 (2  $\times$  CH), 126.7 (C), 126.2 (2  $\times$  CH), 126.0 (2  $\times$  CH), 122.0 (C), 114.6 (2  $\times$  CH), 66.0 (2  $\times$   $\text{CH}_2$ ), 47.8 (2  $\times$   $\text{CH}_2$ ); HRMS (ES) calcd. for  $\text{C}_{25}\text{H}_{23}\text{N}_2\text{O}_2$ : 383.1760, found: 383.1764  $[\text{M}+\text{H}]^+$ ; IR  $\nu_{\text{max}}/\text{cm}^{-1}$  3377, 3059, 1615, 1514, 1445, 1260, 1239, 923, 824, 740, 685.

**2,5-Diphenyl-4-(4-(pyrrolidin-1-yl)phenyl)oxazole (5ca)**

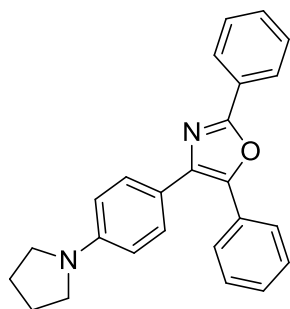

Oxazole **5ca** was synthesised according to **GP5** using aniline derivative **4c** (50 mg, 0.2 mmol, 1.0 equiv) and ylide **2a** (90 mg, 0.45 mmol, 2.25 equiv). The reaction mixture was quenched after 48 h. After purification with flash column chromatography (Toluene) the oxazole was isolated as a brown solid (25 mg, 34%); mp. 130-135 °C;  $^1\text{H-NMR}$  (300 MHz,  $\text{CDCl}_3$ )  $\delta$  8.21-8.17 (m, 2H), 7.77-7.70 (m, 2H), 7.59 (d,  $J$  = 8.7 Hz, 2H), 7.52-7.43 (m, 3H), 7.40-7.35 (m, 2H), 7.36-7.31 (m, 1H), 6.59 (d,  $J$  = 8.7 Hz, 2H), 3.34 (t,  $J$  = 6.6, 4H), 2.06-2.02 (m, 4H);  $^{13}\text{C-NMR}$  (400 MHz,  $\text{CDCl}_3$ )  $\delta$  159.9 (C), 147.9 (C), 144.1 (C), 137.7 (C), 130.1 (CH), 129.8 (C), 129.2 (2  $\times$  CH), 128.8 (2  $\times$  CH), 128.7 (2  $\times$  CH), 128.0 (CH), 127.9 (C), 126.6 (2  $\times$  CH), 126.4 (2  $\times$  CH), 119.4 (C), 111.7 (2  $\times$  CH), 47.7 (2  $\times$   $\text{CH}_2$ ), 25.6 (2  $\times$   $\text{CH}_2$ ); HRMS (ES) calcd. for  $\text{C}_{25}\text{H}_{23}\text{N}_2\text{O}$ : 367.1810, found: 367.1812  $[\text{M}+\text{H}]^+$ ; IR  $\nu_{\text{max}}/\text{cm}^{-1}$  2851, 1614, 1378, 1112, 765, 686.

**4-(5-(4-Methoxyphenyl)-2-phenyloxazol-4-yl)-N,N-dimethylaniline (7)**

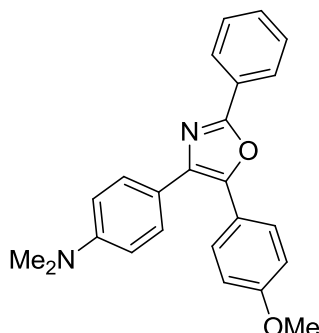

Oxazole **7** was synthesised according to **GP4** using aniline derivative **6** (50 mg, 0.2 mmol, 1.0 equiv) and ylide **2a** (90 mg, 0.45 mmol, 2.25 equiv). The reaction mixture was quenched after 48 h. After purification with flash column chromatography (Toluene) the oxazole was isolated as a yellow powder (63 mg, 84%); mp. 117-120 °C;  $^1\text{H-NMR}$  (300 MHz,  $\text{CDCl}_3$ )  $\delta$  8.18 (m, 2H), 7.65 (d,  $J$  = 8.9 Hz, 2H), 7.60 (d,  $J$  = 8.9 Hz, 2H), 7.51-7.41 (m, 3H), 6.92 (d,  $J$  = 8.9 Hz, 2H), 6.75 (d,  $J$  = 8.9 Hz, 2H), 3.85 (s, 3H), 3.00 (s, 6H);  $^{13}\text{C-NMR}$  (101 MHz,  $\text{CDCl}_3$ )  $\delta$  159.6 (C), 159.5 (C), 150.4 (C), 144.4 (C), 136.2 (C), 130.1 (CH), 129.0 (2  $\times$  CH), 128.8 (2  $\times$  CH), 128.1 (2  $\times$  CH), 127.9 (C), 126.5 (2  $\times$  CH), 122.4 (C), 120.7 (C), 114.2 (2  $\times$  CH), 112.5 (2  $\times$  CH), 55.5 ( $\text{OCH}_3$ ), 40.6 (2  $\times$   $\text{CH}_3$ ); HRMS (ES) calcd. for  $\text{C}_{24}\text{H}_{23}\text{N}_2\text{O}_2$ : 371.1760, found: 371.1755  $[\text{M}+\text{H}]^+$ ; IR  $\nu_{\text{max}}/\text{cm}^{-1}$  2902, 1615, 1500, 1250, 1174, 1029, 827, 686.

<sup>13</sup>C-NMR comparison table for characteristic peaks

| Compound                                                                                      | NMR solvent         | C1    | C2    | C3    | C4    | C5    | C6    | C7    | C8    | C9    |
|-----------------------------------------------------------------------------------------------|---------------------|-------|-------|-------|-------|-------|-------|-------|-------|-------|
| 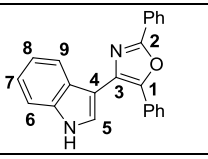 <b>3aa</b>   | DMSO-d <sub>6</sub> | 144.2 | 159.1 | 136.2 | 106.5 | 125.1 | 111.9 | 121.6 | 119.3 | 120.1 |
|  <b>3ba</b>   | CDCl <sub>3</sub>   | 145.1 | 160.1 | 137.3 | 107.2 | 128.0 | 109.5 | 122.1 | 120.0 | 121.5 |
|  <b>3ca</b>   | CDCl <sub>3</sub>   | 145.2 | 160.1 | 136.7 | 108.0 | 127.9 | 110.0 | 122.4 | 120.3 | 121.6 |
|  <b>3da</b>   | DMSO-d <sub>6</sub> | 143.2 | 159.0 | 136.2 | 106.0 | 125.2 | 112.0 | 121.7 | 119.6 | 121.0 |
|  <b>3ea</b>  | DMSO-d <sub>6</sub> | 140.2 | 158.8 | 136.2 | 105.6 | 125.3 | 111.7 | 121.7 | 119.5 | 120.3 |
|  <b>3fa</b> | CDCl <sub>3</sub>   | 145.1 | 160.1 | 137.3 | 107.2 | 128.0 | 109.5 | 122.1 | 120.0 | 121.5 |
|  <b>3ga</b> | DMSO-d <sub>6</sub> | 144.4 | 159.2 | 136.2 | 106.6 | 124.8 | 111.8 | 121.6 | 119.3 | 120.2 |
|  <b>3ha</b> | CDCl <sub>3</sub>   | 144.6 | 160.1 | 136.4 | 108.8 | 124.1 | 111.4 | 122.8 | 120.5 | 121.2 |
|  <b>3ia</b> | CDCl <sub>3</sub>   | 147.5 | 158.7 | 136.3 | 108.9 | 122.6 | 111.2 | 122.6 | 120.3 | 121.3 |
|  <b>3ja</b> | CDCl <sub>3</sub>   | 142.9 | 160.9 | 136.2 | 108.5 | 127.5 | 111.2 | 122.5 | 120.4 | 121.4 |

|                                                                                                      |                     |       |       |       |       |       |       |       |       |       |
|------------------------------------------------------------------------------------------------------|---------------------|-------|-------|-------|-------|-------|-------|-------|-------|-------|
| 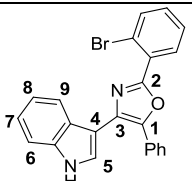 <p><b>3ab</b></p>   | CDCl <sub>3</sub>   | 145.9 | 158.6 | 136.2 | 108.7 | 124.0 | 111.2 | 122.6 | 120.4 | 121.3 |
|  <p><b>3hb</b></p>   | DMSO-d <sub>6</sub> | 143.7 | 157.7 | 136.2 | 105.9 | 125.1 | 111.9 | 121.7 | 119.5 | 120.2 |
|  <p><b>3ac</b></p>   | DMSO-d <sub>6</sub> | 144.9 | 160.2 | 136.4 | 108.9 | 124.2 | 111.3 | 122.6 | 120.4 | 121.3 |
|  <p><b>3ad</b></p>  | CDCl <sub>3</sub>   | 145.4 | 159.3 | 136.4 | 108.9 | 124.1 | 111.4 | 122.7 | 120.5 | 121.3 |
|  <p><b>3hd</b></p> | DMSO-d <sub>6</sub> | 143.5 | 163.5 | 136.2 | 106.2 | 125.0 | 111.9 | 121.6 | 119.4 | 120.0 |
|  <p><b>3ae</b></p> | CDCl <sub>3</sub>   | 144.9 | 153.1 | 136.3 | 108.6 | 124.5 | 111.4 | 122.6 | 120.4 | 121.3 |
|  <p><b>3ce</b></p> | CDCl <sub>3</sub>   | 144.8 | 153.2 | 136.8 | 107.7 | 126.6 | 111.7 | 122.4 | 120.3 | 121.7 |
|  <p><b>3af</b></p> | DMSO-d <sub>6</sub> | 143.6 | 155.5 | 136.2 | 106.2 | 125.3 | 111.9 | 121.6 | 119.4 | 120.1 |

|                                                                                               |                     |       |       |       |       |       |       |                      |       |       |
|-----------------------------------------------------------------------------------------------|---------------------|-------|-------|-------|-------|-------|-------|----------------------|-------|-------|
| 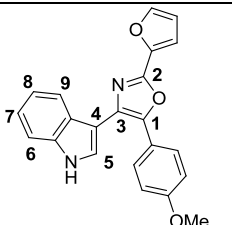 <b>3ge</b>   | CDCl <sub>3</sub>   | 144.3 | 159.3 | 136.3 | 108.8 | 124.4 | 111.3 | 122.5                | 120.3 | 121.3 |
|  <b>3ka</b>   | CDCl <sub>3</sub>   | 145.7 | 160.3 | 135.0 | 108.7 | 125.9 | 112.8 | 123.9                | 128.4 | 130.5 |
|  <b>3kf</b>   | DMSO-d <sub>6</sub> | 143.8 | 155.7 | 134.9 | 105.9 | 126.7 | 114.0 | 128.6<br>or<br>128.5 | 127.7 | 129.8 |
|  <b>3fe</b>   | DMSO-d <sub>6</sub> | 141.9 | 151.8 | 136.2 | 105.3 | 125.5 | 111.9 | 121.7                | 119.5 | 120.2 |
|  <b>3ef</b>  | DMSO-d <sub>6</sub> | 143.0 | 155.4 | 136.1 | 105.3 | 125.3 | 111.8 | 121.7                | 119.6 | 120.7 |
|  <b>3la</b> | CDCl <sub>3</sub>   | 145.7 | 160.3 | 135.8 | 109.3 | 127.5 | 113.9 | 131.0                | 120.9 | 121.4 |
|  <b>3le</b> | DMSO-d <sub>6</sub> | 143.8 | 152.3 | 135.5 | 106.8 | 128.5 | 112.3 | 130.9                | 128.5 | 120.0 |
|  <b>5aa</b> | CDCl <sub>3</sub>   | 144.3 | 160.0 | 137.5 | -     | -     | -     | -                    | -     | -     |
|  <b>5ba</b> | DMSO-d <sub>6</sub> | 144.0 | 159.2 | 136.3 | -     | -     | -     | -                    | -     | -     |

|                                                                                                |                   |       |       |       |   |   |   |   |   |   |
|------------------------------------------------------------------------------------------------|-------------------|-------|-------|-------|---|---|---|---|---|---|
| 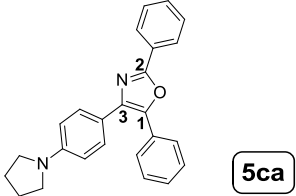<br><b>5ca</b> | CDCl <sub>3</sub> | 144.1 | 159.9 | 137.7 | - | - | - | - | - | - |
| <br><b>7</b>   | CDCl <sub>3</sub> | 144.4 | 159.5 | 136.2 | - | - | - | - | - | - |

### Compound 7 (2D-Spectra Analysis)

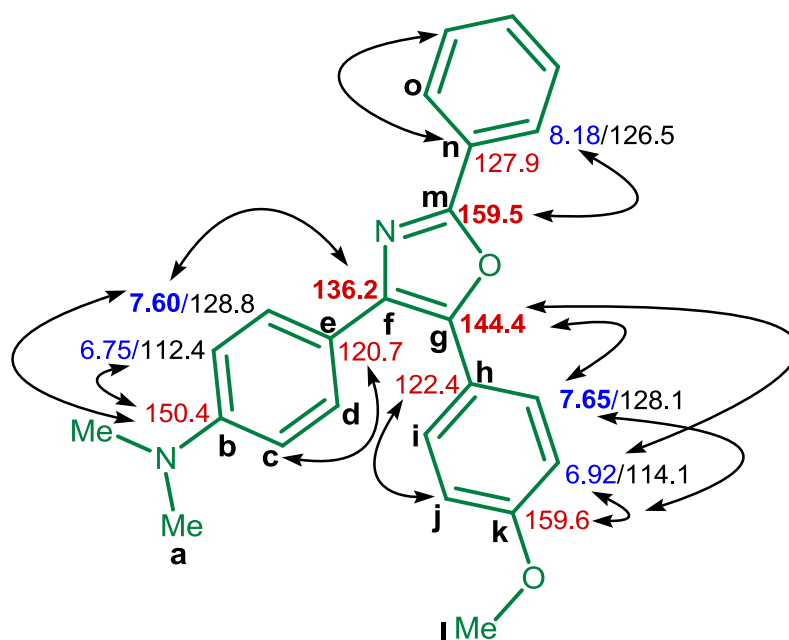

Key correlations from HMBC and HSQC studies for the determination of structure **7** are described below (Chemical shifts are shown in blue (H), black (C) and red (quaternary carbon):

- For the substituent at the 4-position of the oxazole ring: H<sub>a</sub> is coupled with the quaternary C<sub>b</sub> which in turn is coupled with H<sub>c</sub>. H<sub>d</sub> is coupled with C<sub>c</sub> and the quaternary C<sub>f</sub> through a <sup>3</sup>J-coupling.
- For the substituent at the 5-position of the oxazole ring: H<sub>i</sub> is coupled with the quaternary C<sub>k</sub> which in turn is coupled with H<sub>j</sub>. H<sub>i</sub> is coupled with C<sub>j</sub> and the quaternary C<sub>g</sub> through a <sup>3</sup>J-coupling.
- For the substituent at the 2-position of the oxazole ring: H<sub>o</sub> is coupled with C<sub>m</sub>.
- The assignment of the quaternary carbons at the oxazole ring (C<sub>f</sub>, C<sub>g</sub>, C<sub>m</sub>) is in agreement with data reported in the literature.<sup>38</sup>

### Crystal Data for **3aa**

$C_{23}H_{16}N_2O$ ,  $M = 336.38$ , Monoclinic,  $a = 12.0222(2)$ ,  $b = 7.2396(1)$ ,  $c = 20.9825(3)$  Å,  $\beta = 106.482(1)$ ,  $U = 1751.19(5)$  Å<sup>3</sup>,  $T = 120(2)$  K, space group  $P2_1/c$ ,  $Z = 4$ , 11907 reflections measured, 3042 unique ( $R_{int} = 0.0655$ ) which were used in all calculations. The final  $R1$  was 0.0525 ( $I > 2\sigma(I)$ ) and  $wR(F_2)$  was 0.1537 (all data).

Suitable crystals were selected and a dataset was measured on a Bruker SMART 6000 diffractometer ( $\lambda_{Cu-K\alpha} = 1.5418$  Å). The data collection was driven by SMART<sup>39</sup> and processed by SAINTPLUS<sup>40</sup> and an absorption correction was applied using SADABS.<sup>41</sup> The structure was solved using ShelXS-97<sup>42</sup> and refined by a full-matrix least-squares procedure on  $F^2$  in ShelXL-97.<sup>42</sup> All non-hydrogen atoms were refined with anisotropic displacement parameters. The N-bound hydrogen atom was located in the electron density and the position refined freely. All remaining hydrogen atoms were added at calculated positions and refined by use of a riding model and the isotropic displacement parameters for all hydrogen atoms are based on the equivalent isotropic displacement parameter ( $U_{eq}$ ) of the parent atom. Figures were produced using OLEX2.<sup>43</sup>

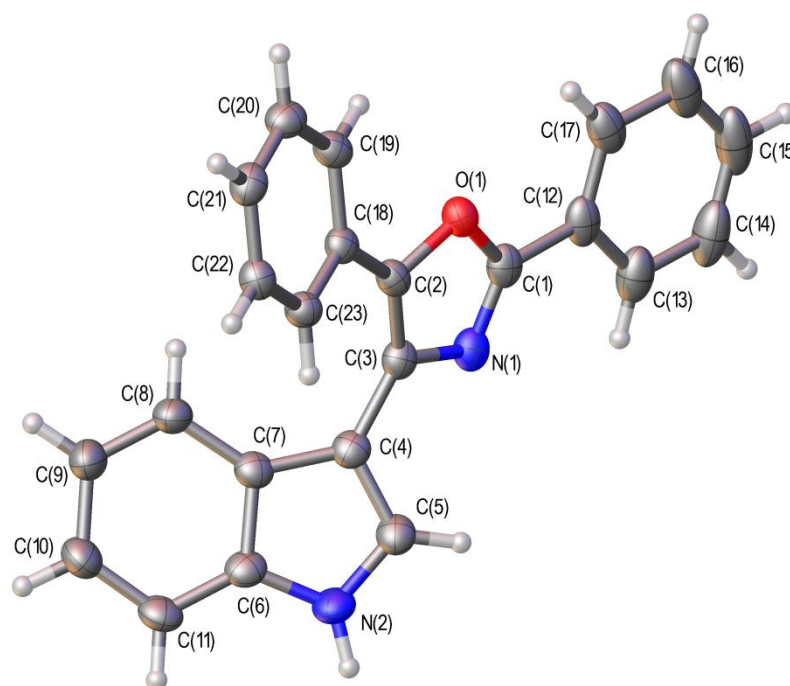

**Figure S1** Crystal structure of oxazole **3aa** with ellipsoids drawn at the 50 % probability level.



## References

1. S. López, E. Herrero-Gómez, P. Pérez-Galán, C. Nieto-Oberhuber and A. M. Echavarren, *Angew. Chem. Int. Ed.*, 2006, **45**, 6029.
2. J. Oakdale and D. L. Boger, *Org. Lett.*, 2010, **12**, 1132.
3. A. Kong, X. Han and X. Lu, *Org. Lett.* 2006, **8**, 1339.
4. V. Bocchi and G. Palla, *Synthesis*, 1982, 1096.
5. Industrial Technology Research Institute; YUNG SHIN PHARM. IND. CO., LTD.; Synthesis of indole analogs of 1-benzyl-3-(5'-hydroxymethyl-2'-furyl) indazole (YC-1) as anti-platelet agents, 2006, US2006/10604 A1;
6. (a) R. S. Coleman and M. C. Walczak, *J. Org. Chem.*, 2006, **71**, 9841; b) Y. R. Bhorge, C. Chang, S. Chang and T. Yan, *Eur. J. Org. Chem.*, 2012, **25**, 4805.
7. (a) M. Ganesh and I. Namboothiri, *Tetrahedron*, 2007, **63**, 11973; (b) A. Carpita; R. Rossi and C. A. Veracini, *Tetrahedron*, 1985, **41**, 1919.
8. N. Arai, T. Miyaoku, S. Teruya and A. Mori, *Tetrahedron Lett.*, 2008, **49**, 1000.
9. A. Rosiak, W. Frey and J. Christoffers, *Eur. J. Org. Chem.*, 2006, **17**, 4044.
10. T. Ide, D. Takeuchi, K. Osakada, S. MacHida, S. Shigeru and S. Sakamoto, *J. Org. Chem.*, 2012, **77**, 4837; b) L. Dong-Hwan, K. Young-Jun and J. Myung-Jong, *Adv. Synth. Catal.*, 2011, **17**, 3090.
11. N. Zhou; L. Wang, D. Thompson and Y. Zhao, *Tetrahedron*, 2011, **67**, 125.
12. A. V. Shastin, V. N. Korotchenko, V. G. Nenajdenko and E. S. Balenkova, *Synthesis*, 2001, **14**, 2081.
13. K. Park, T. Palani, A. Pyo and S. Lee, *Tetrahedron Lett.*, 2012, **53**, 733.
14. S. Collins, G. Yap and A. G. Fallis, *Angew. Chem. Int. Ed.*, 2000, **39**, 385.
15. C. Koerner, P. Starkov and T. D. Sheppard, *J. Am. Chem. Soc.*, 2010, **132**, 5968.
16. S. Hamri, J. Rodriguez, J. Basset, M. Dolores Pujol and D. Guillaumet, *Tetrahedron*, 2012, **68**, 6269.
17. a) BOEHRINGER INGELHEIM INTERNATIONAL GmbH; BOEHRINGER INGELHEIM PHARMA GmbH and CO KG; Viral polymerase inhibitors, 2005, WO2005/80388 A1 b) F. Brown, L. Cronk, D. Aharony and D. W. Snyder, *J. Med. Chem.*, 1992, **35**, 2419.
18. C. Mothes, S. Lavielle and P. Karoyan, *J. Org. Chem.*, 2008, **73**, 6706.
19. a) C. Monnereau and E. B. F. Odobel, *Tetrahedron Lett.*, 2005, **46**, 5421; b) M. Shao and Y. Zhao, *Tetrahedron Lett.*, 2010, **51**, 2892.
20. (a) H. Zhang, Q. Cai, and D. Ma, *J. Org. Chem.*, 2005, **13**, 5164; b) G. Xu and Y. G. Wang, *Org. Lett.*, 2004, **6**, 985.
21. a) Z. Shen and X. Lu, *Adv. Synth. Catal.*, 2009, **351**, 3107; b) M. Pena-Lopez, L. A. Sarandeses and J. Perez Sestelo, *Eur. J. Org. Chem.*, 2013, **13**, 2545;
22. a) Catalytica Pharmaceuticals, Inc, N-benzylidene aminophenylacetylene carbinols, 2000, US6100429 A1; b) C. H. Lin, Y. J. Wang and C. F. Lee, *Eur. J. Org. Chem.*, 2010, **23**, 4368.

23. A. Gooch, A. M. McGhee, M. L. Pellizzaro, A. J. Wilson and C. Lindsay, *Org. Lett.*, 2011, **13**, 240.
24. (a) C. Legault and A. B. Charette, *J. Org. Chem.*, 2003, **68**, 7119; (b) C. Legault and A. B. Charette, *J. Am. Chem. Soc.* 2003, **125**, 6360.
25. C. H. M. Amijs, V. López-Carrillo, M. Raducan, P. Pérez-Galán, C. Ferrer and A. M. Echavarren, *J. Org. Chem.*, 2008, **73**, 7721.
26. T. N. Sakamoto, Y. Kondo, H. Yamanaka, *Chem. Pharm. Bull.*, 1988, **36**, 2248.
27. B. E. Moulton, A. C. Whitwood, A. K. Duhme-Klair, J. M. Lynam and I. J. S. Fairlamb, *J. Org. Chem.*, 2011, **76**, 5320.
28. S. Prateetongkum, K. M. Driller, R. Jackstell, A. Spannenberg and M. Beller, *Chem. Eur. J.*, 2010, **16**, 9606.
29. Y. Gu and X. Wang, *Tetrahedron Lett.*, 2009, **50**, 763.
30. A. Koellhofer and H. Plenio, *Adv. Synth. Catal.*, 2005, **9**, 1295.
31. J. Moon, M. Jang and S. Lee, *J. Org. Chem.*, 2009, **74**, 1403.
32. I. Beletsakya, G. V. Letyshev, A. Tsvetkov and N. V. Lukashev, *Tetrahedron Lett.*, 2003, **44**, 5011.
33. M. Rao, D. Jadhav and P. Dasgupta, *Org. Lett.*, 2010, **12**, 2048.
34. P. W. Davies, A. Cremonesi and L. Dumitrescu, *Angew. Chem. Int. Ed.*, 2011, **50**, 8931.
35. J. Mousseau, J. Bull, C. Ladd, A. Fortier, R. Sustac, D. Roman and A. Charette, *J. Org. Chem.*, 2011, **76**, 243.
36. J. M. Yeung, L. Corleto and E. E. Knaus, *J. Med. Chem.*, 1982, **25**, 191.
37. K. K. Redda, N. S. Rao, A. S. Heiman and H. Melles, *J. Pharm. Sci.*, 1992, **463**.
38. T. Opatz and C. Kison, *Chem. Eur. J.*, 2009, **15**, 843.
39. SMART, *Program for instrument control and data acquisition*, 1997, Bruker AXS, Inc. 5465 East Cheryl Parkway, Madison, Wisconsin, 53711.
40. SAINTPLUS, *program suite for data processing*, 1997, Bruker AXS, Inc. 5465 East Cheryl Parkway, Madison, Wisconsin, 53711.
41. G. M. Sheldrick, 2007, SADABS, Bruker AXS Inc., Madison, Wisconsin, USA.
42. G. M. Sheldrick, *Acta Cryst.*, 2008, **A64**, 112.
43. O. V. Dolomanov, L. J. Bourhis, R. J. Gildea, R. J., J. A. K. Howard and Puschmann, *J. Appl. Crystallogr.*, 2009, **42**, 339.

***<sup>1</sup>H and <sup>13</sup>C-NMR spectra for all immediate precursors and catalysis products***

**Catalyst Au-III**

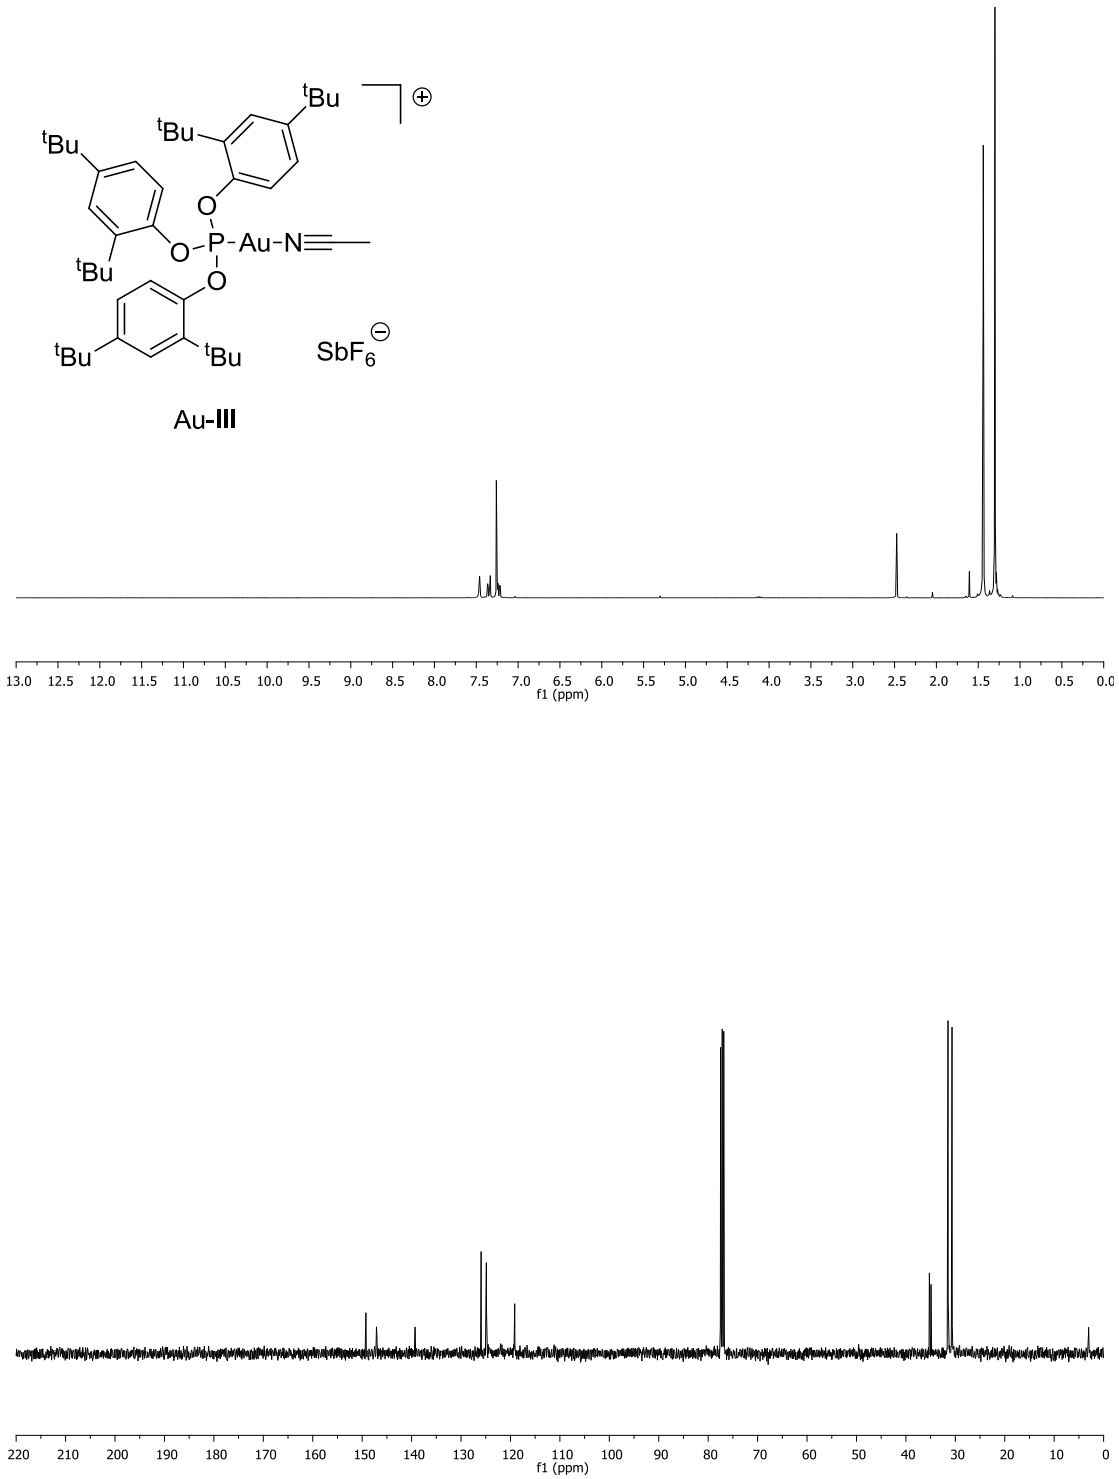

Compound 1a

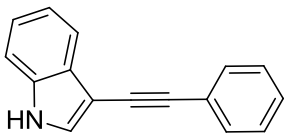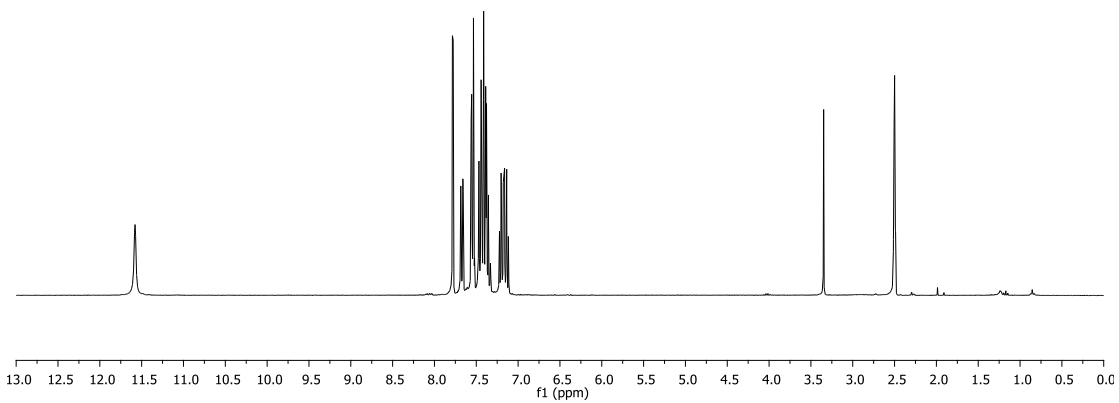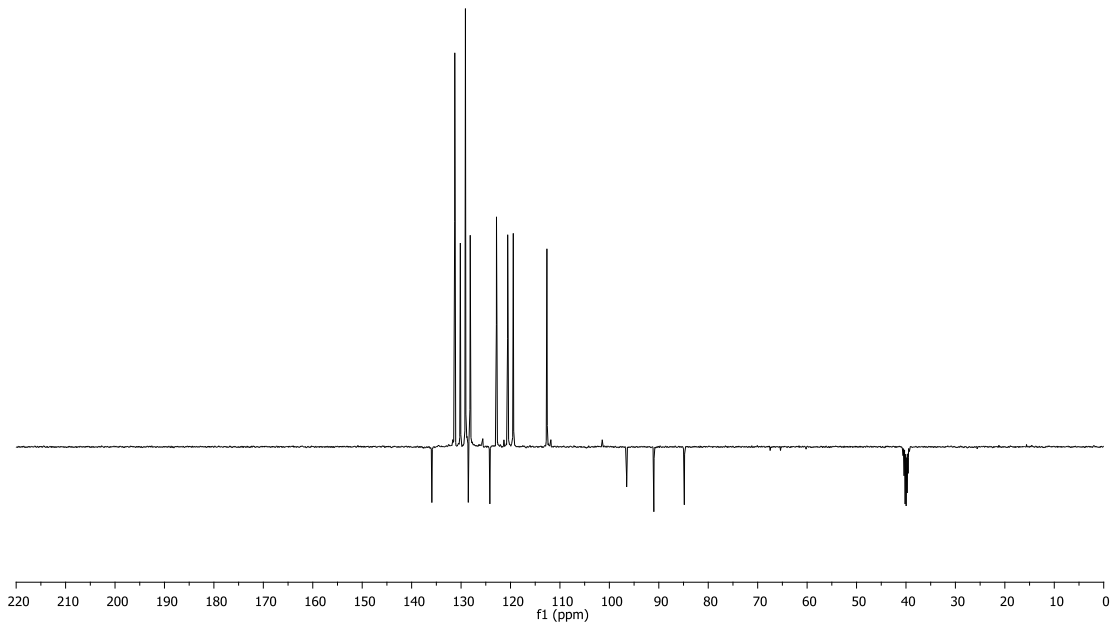

Compound 1b

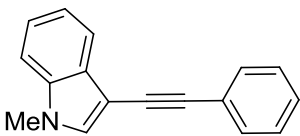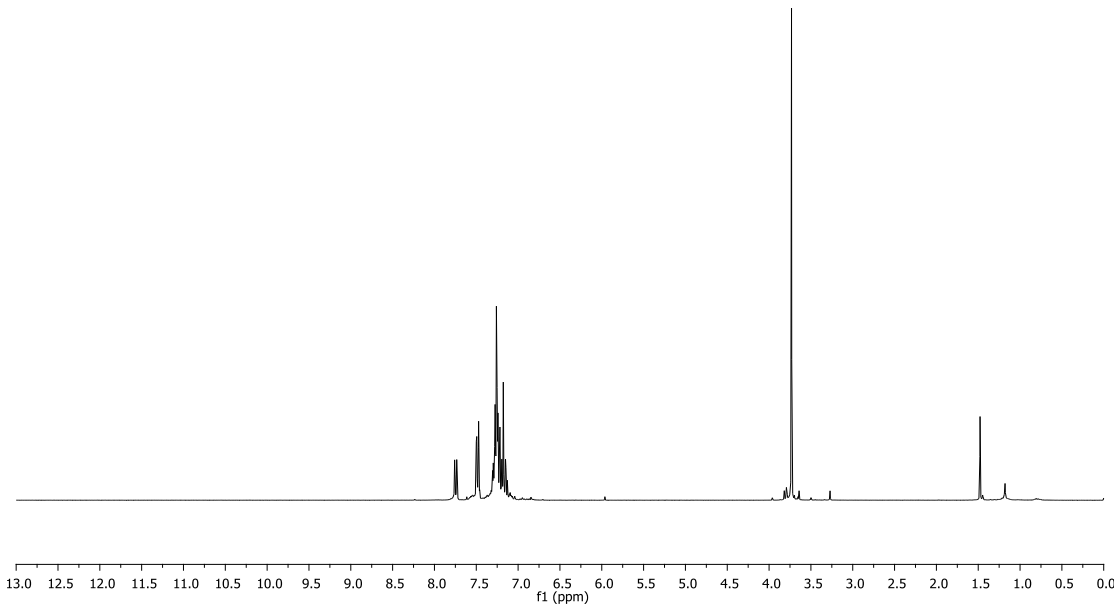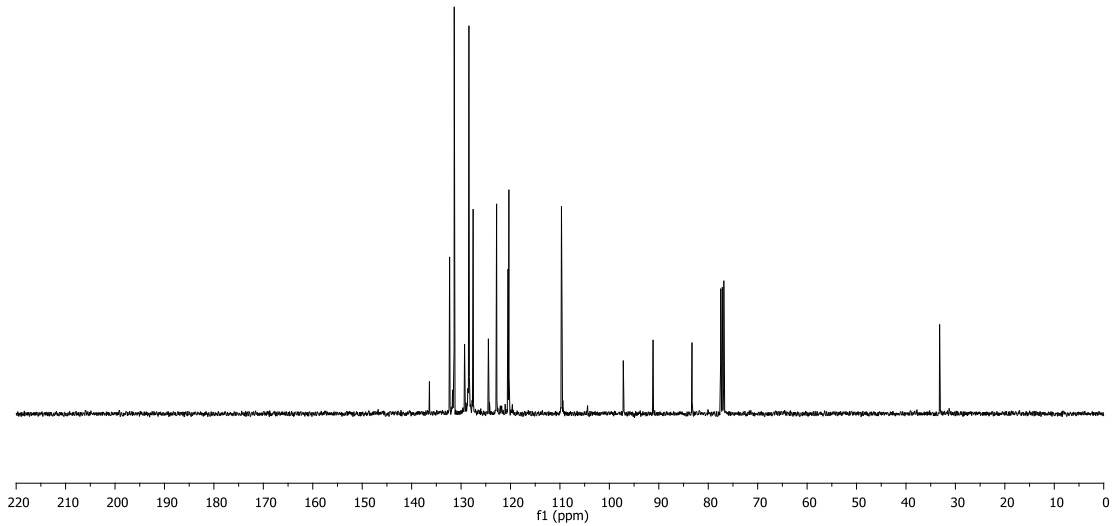

Compound 1c

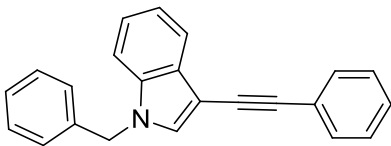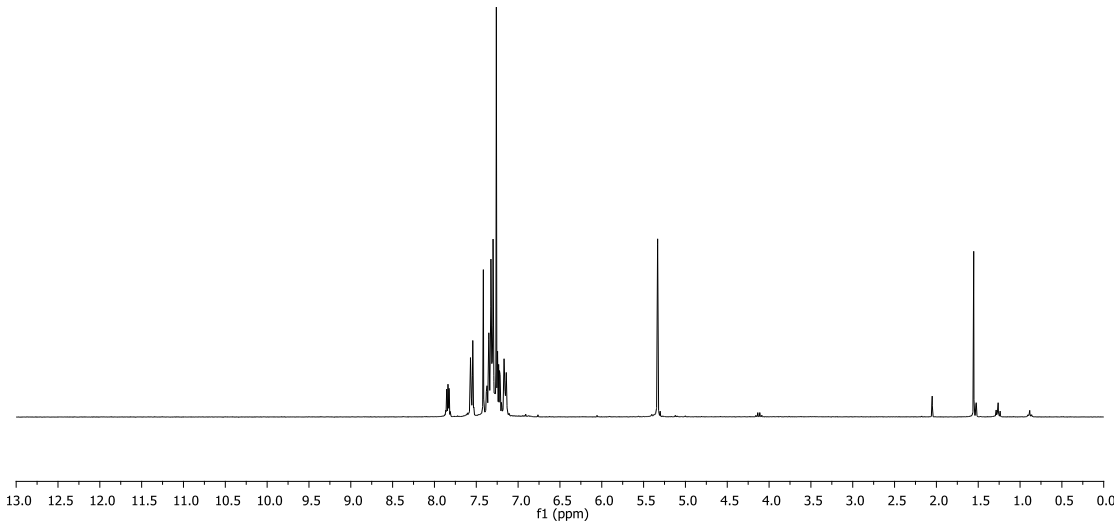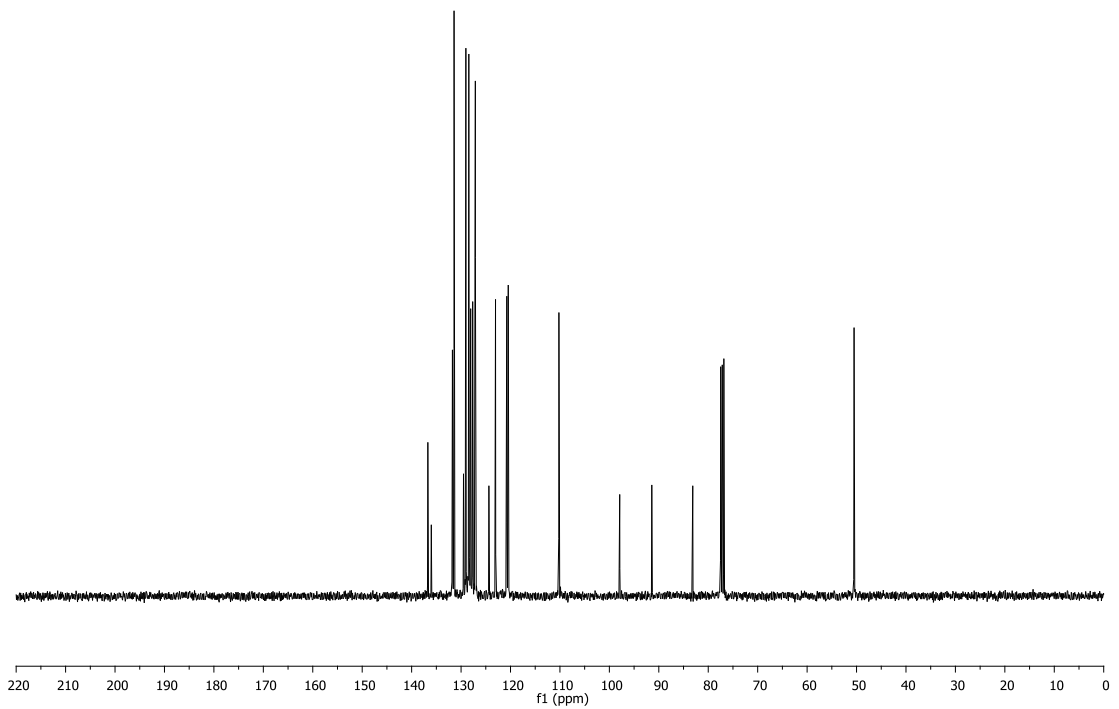

Compound 1d

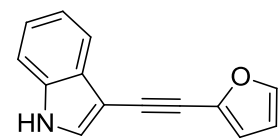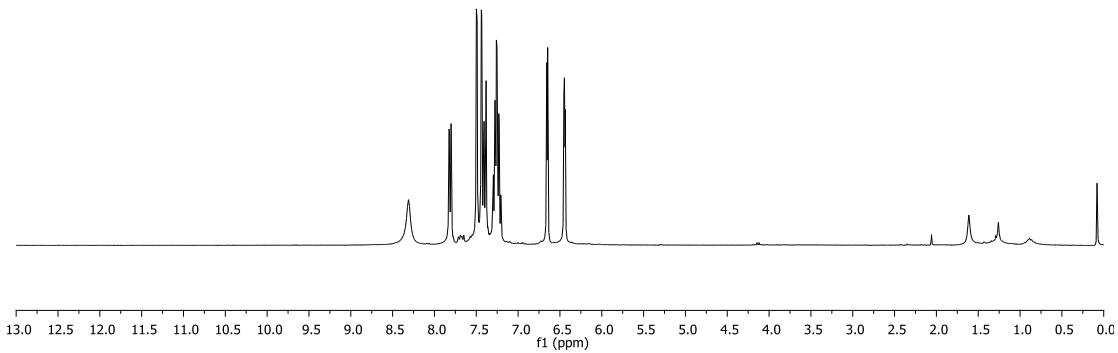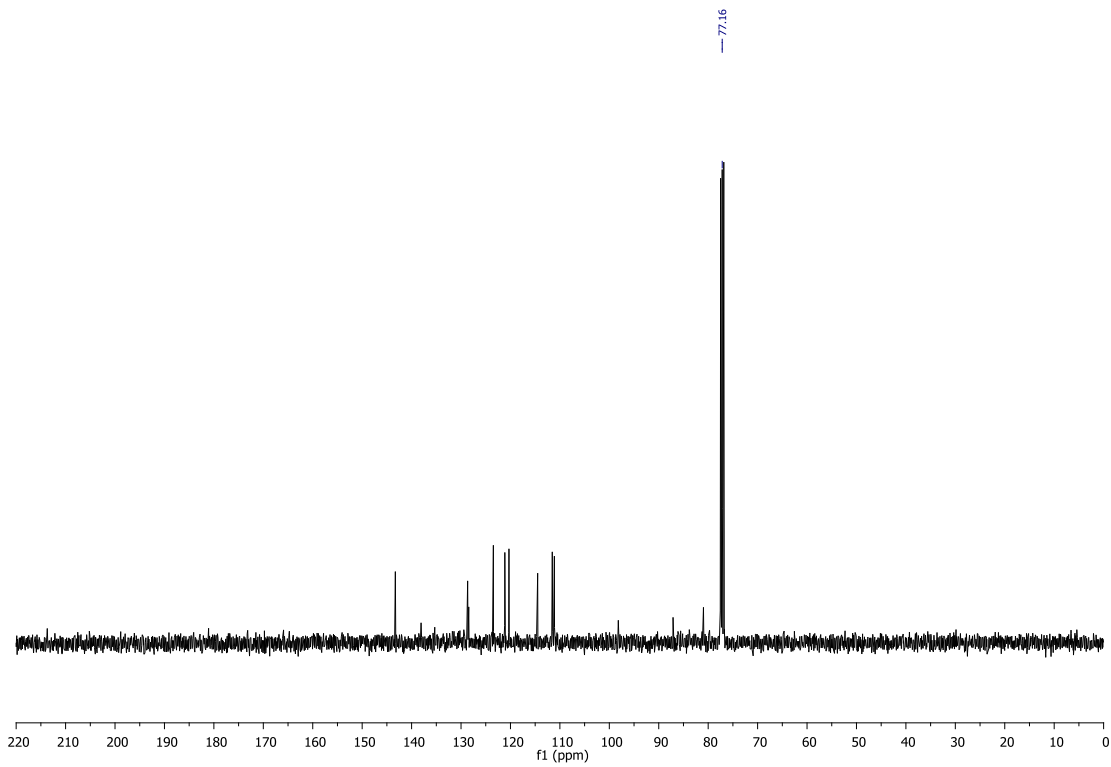

Compound 1e

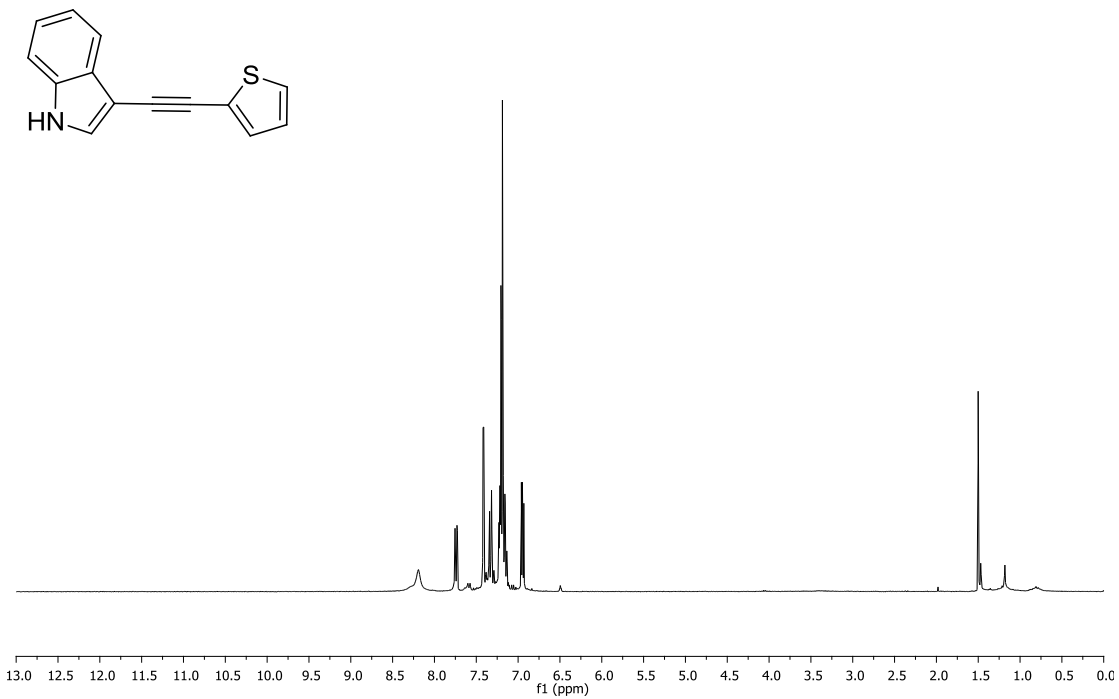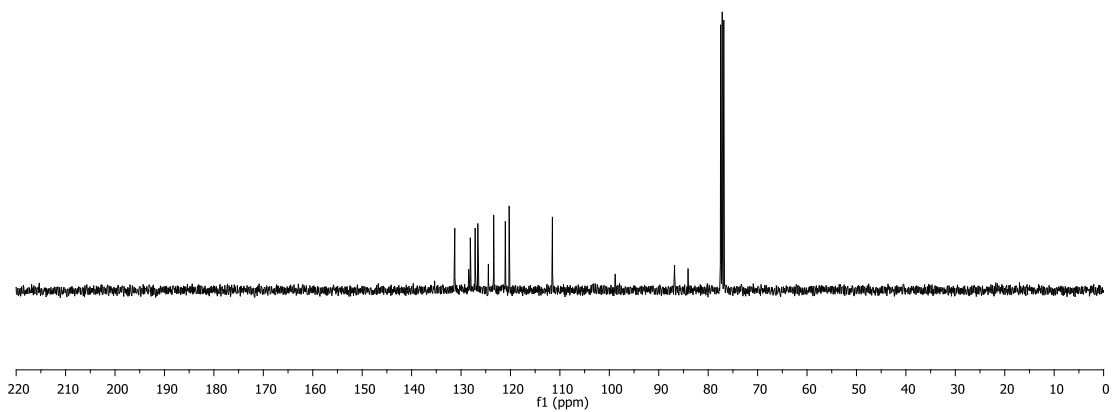



Compound 1f

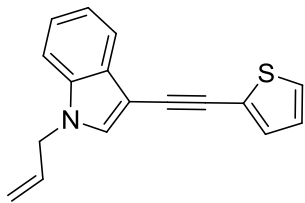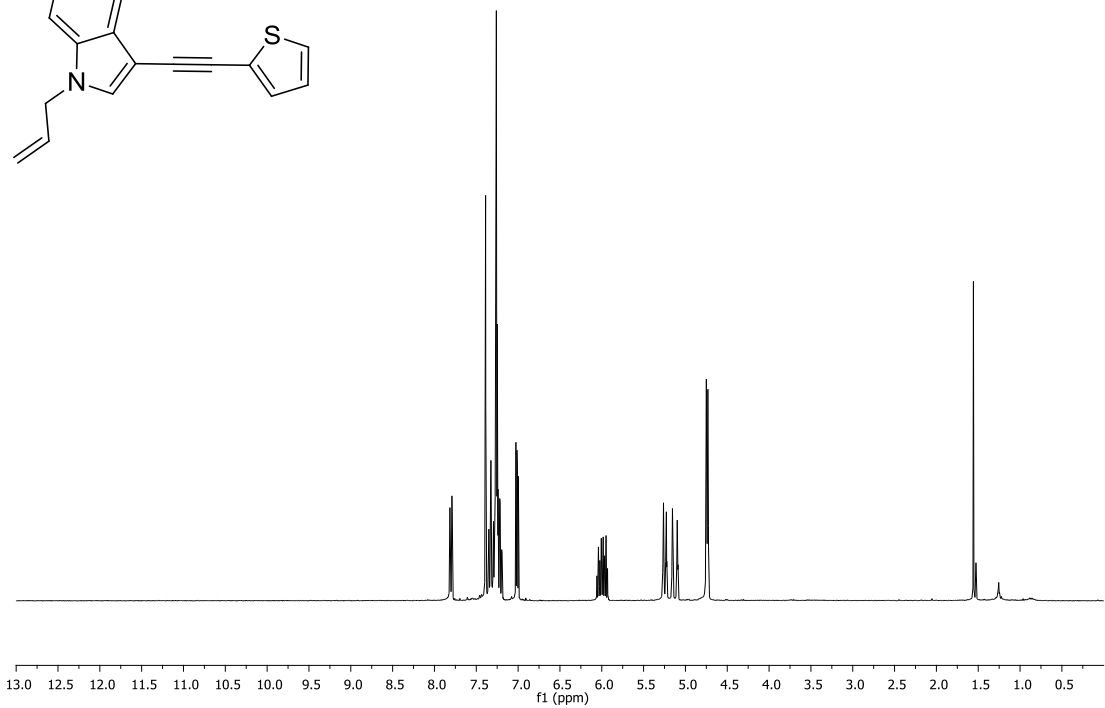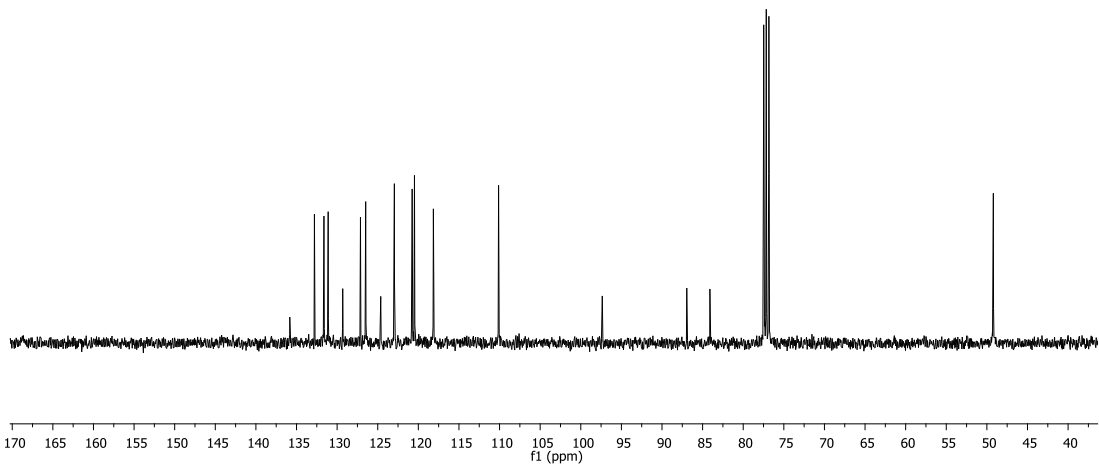

Compound 1g

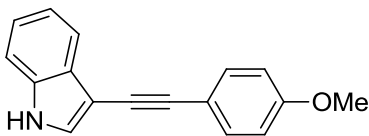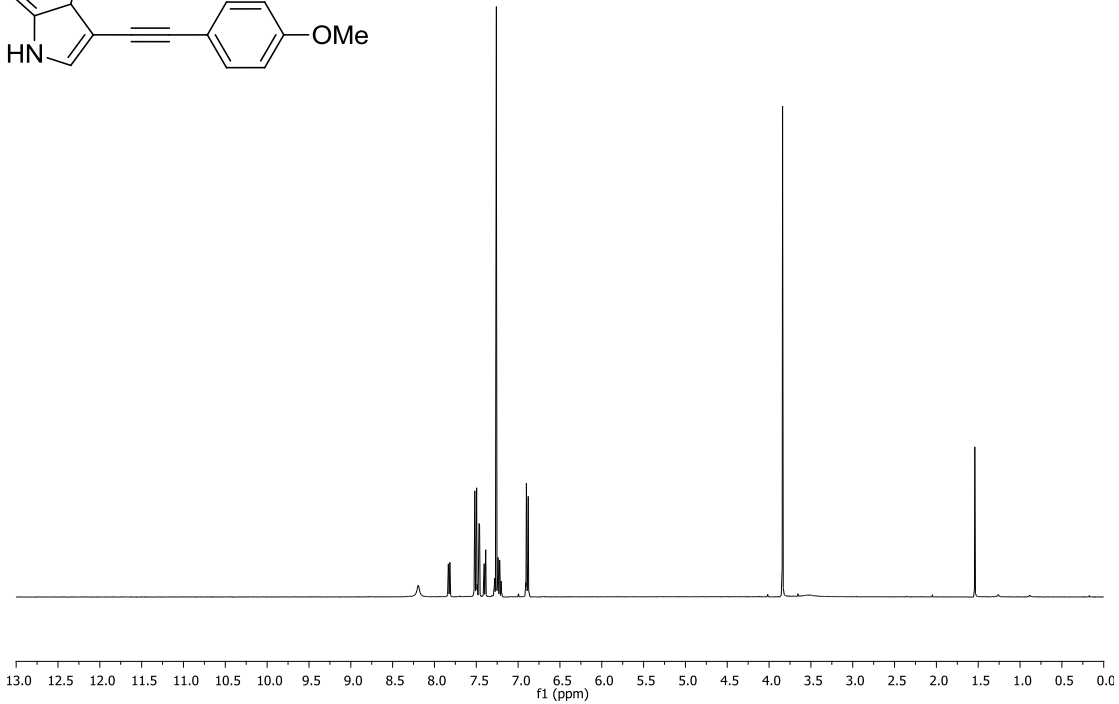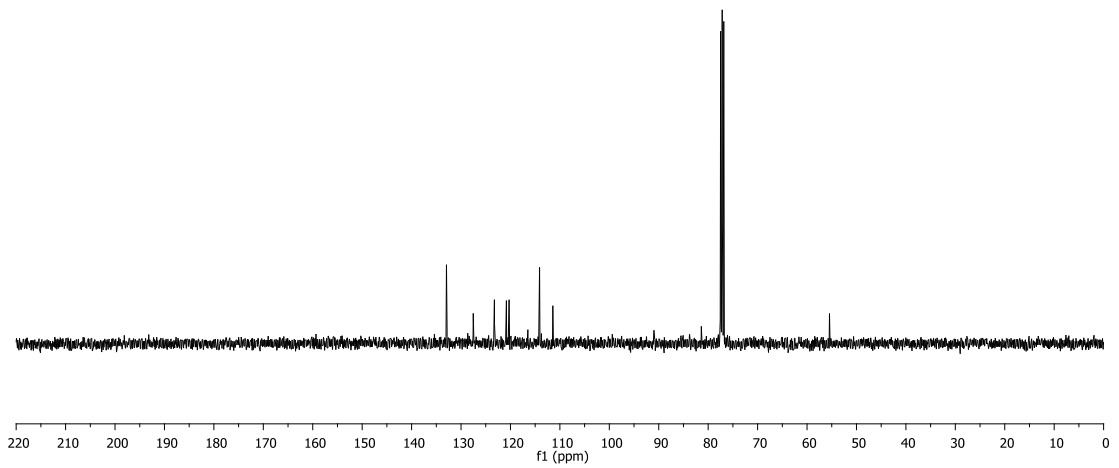

Compound 1h

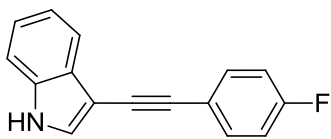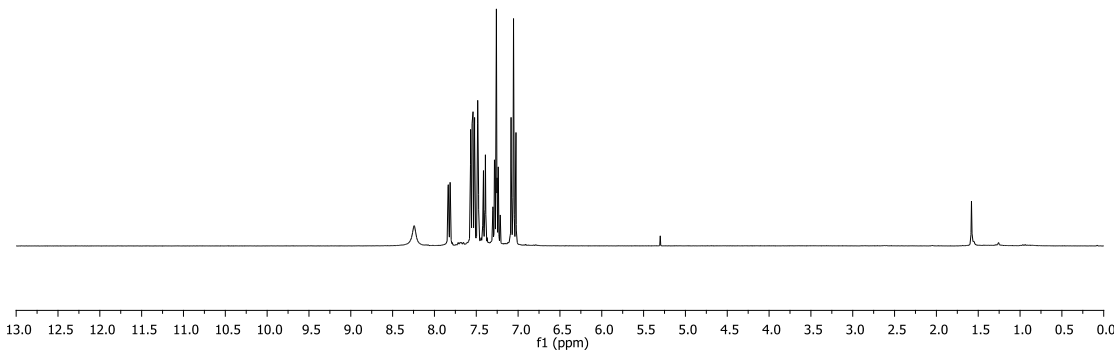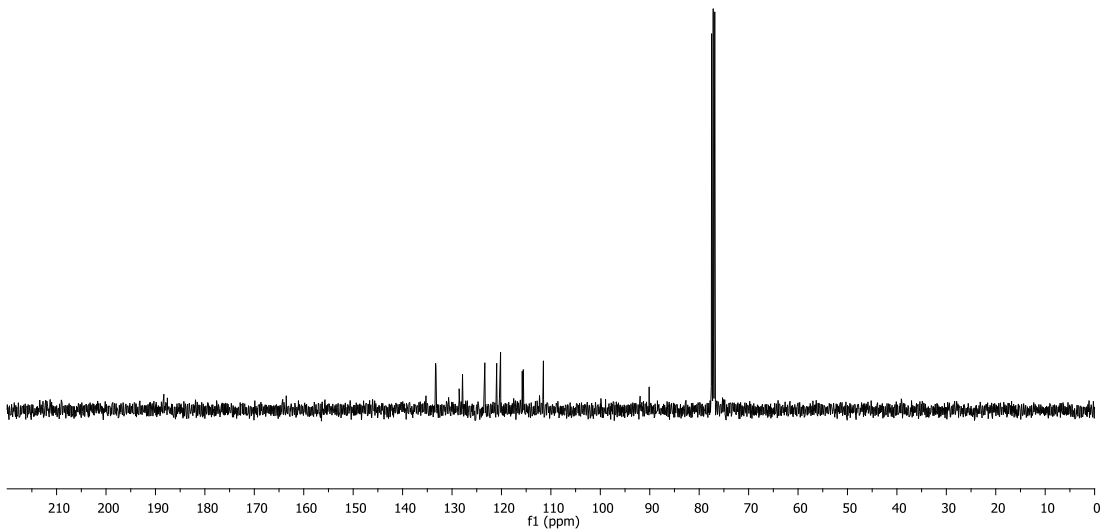

Compound 1i

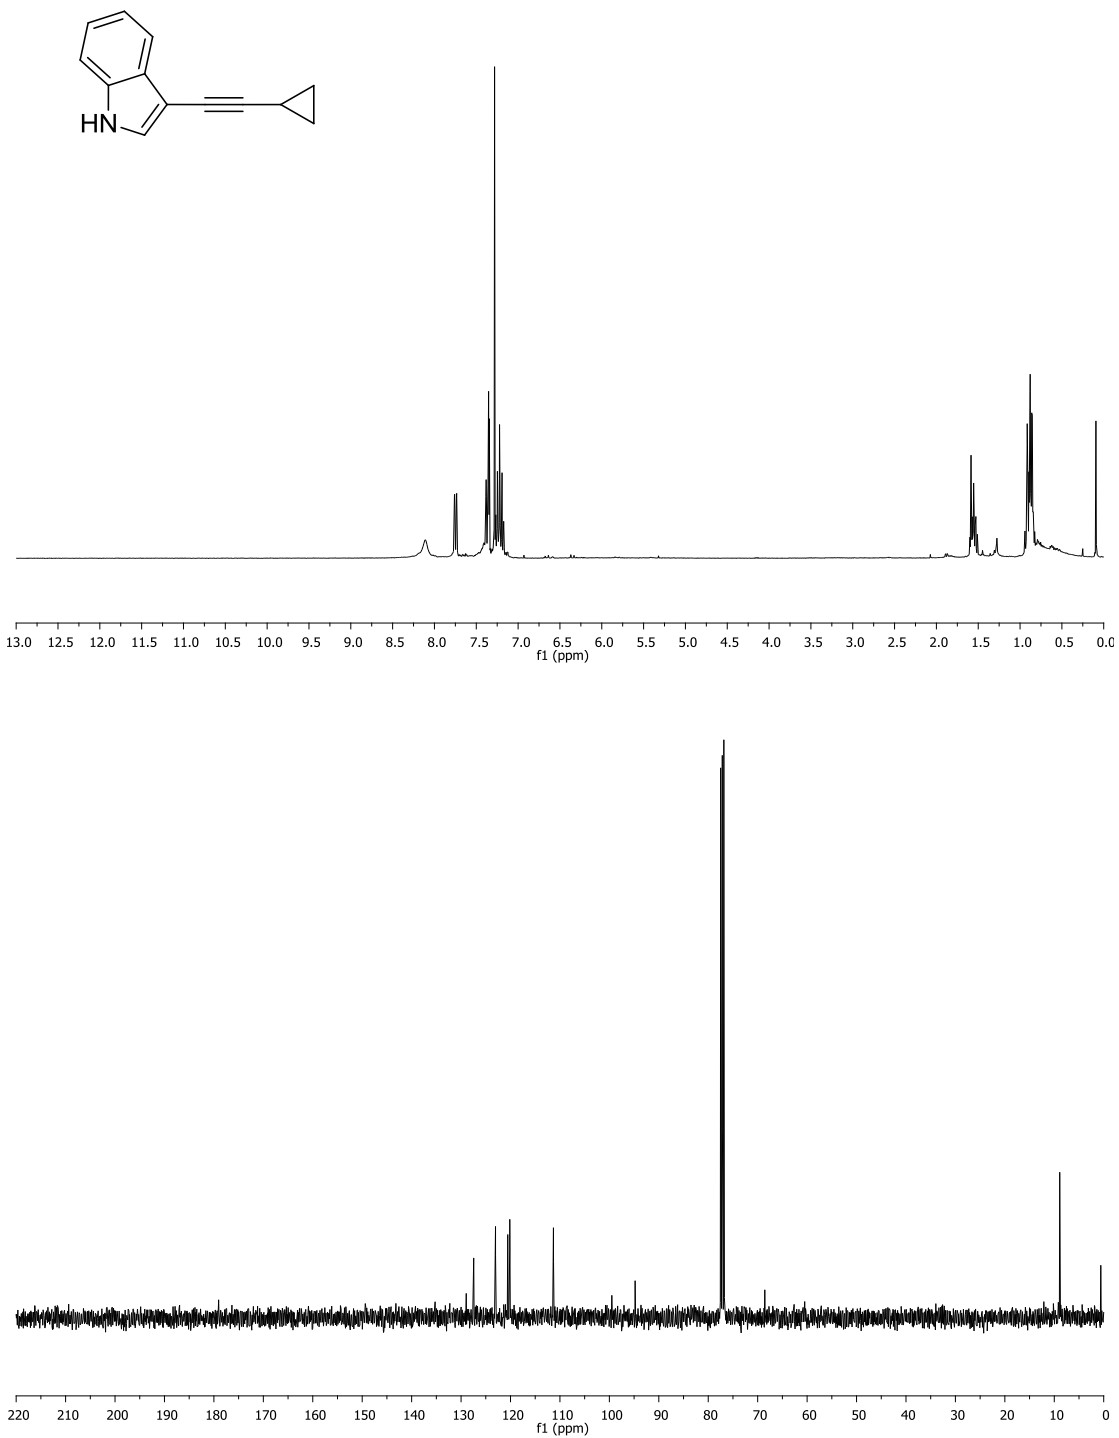

Compound 1j

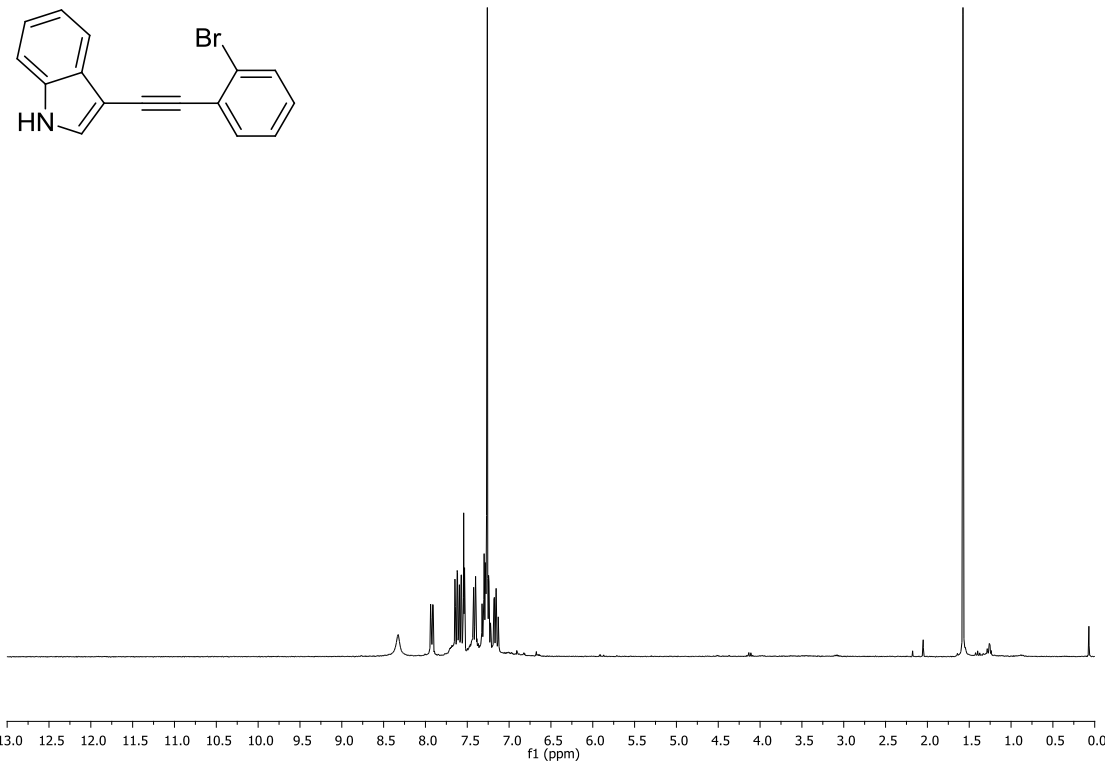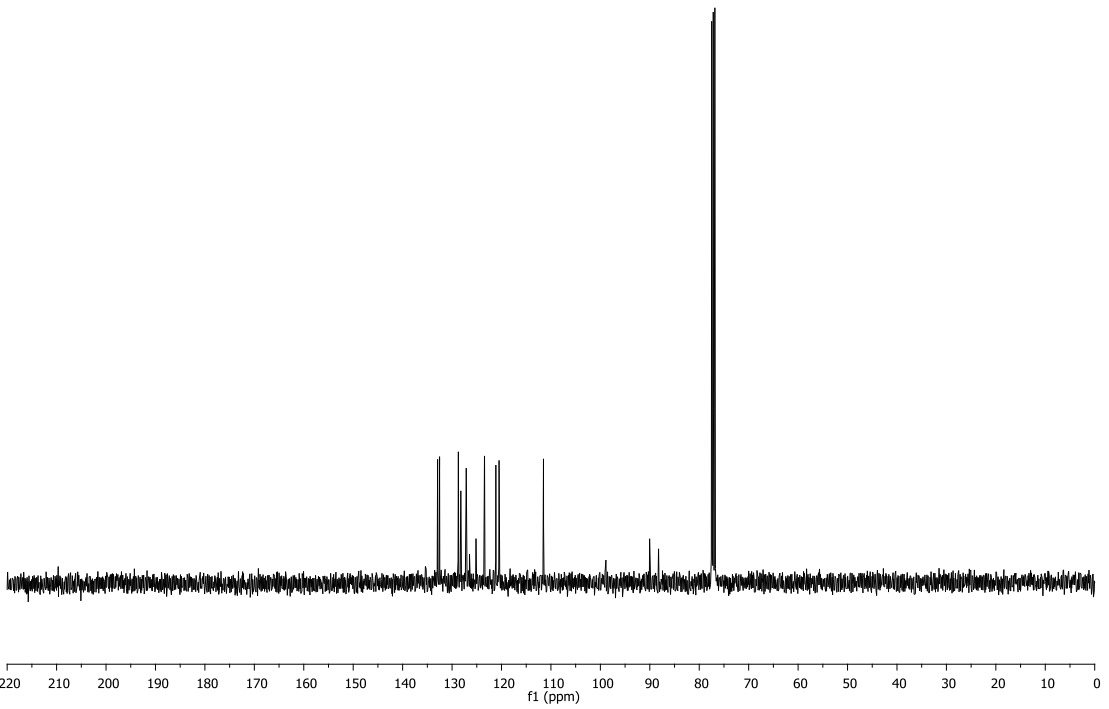

Compound 1k

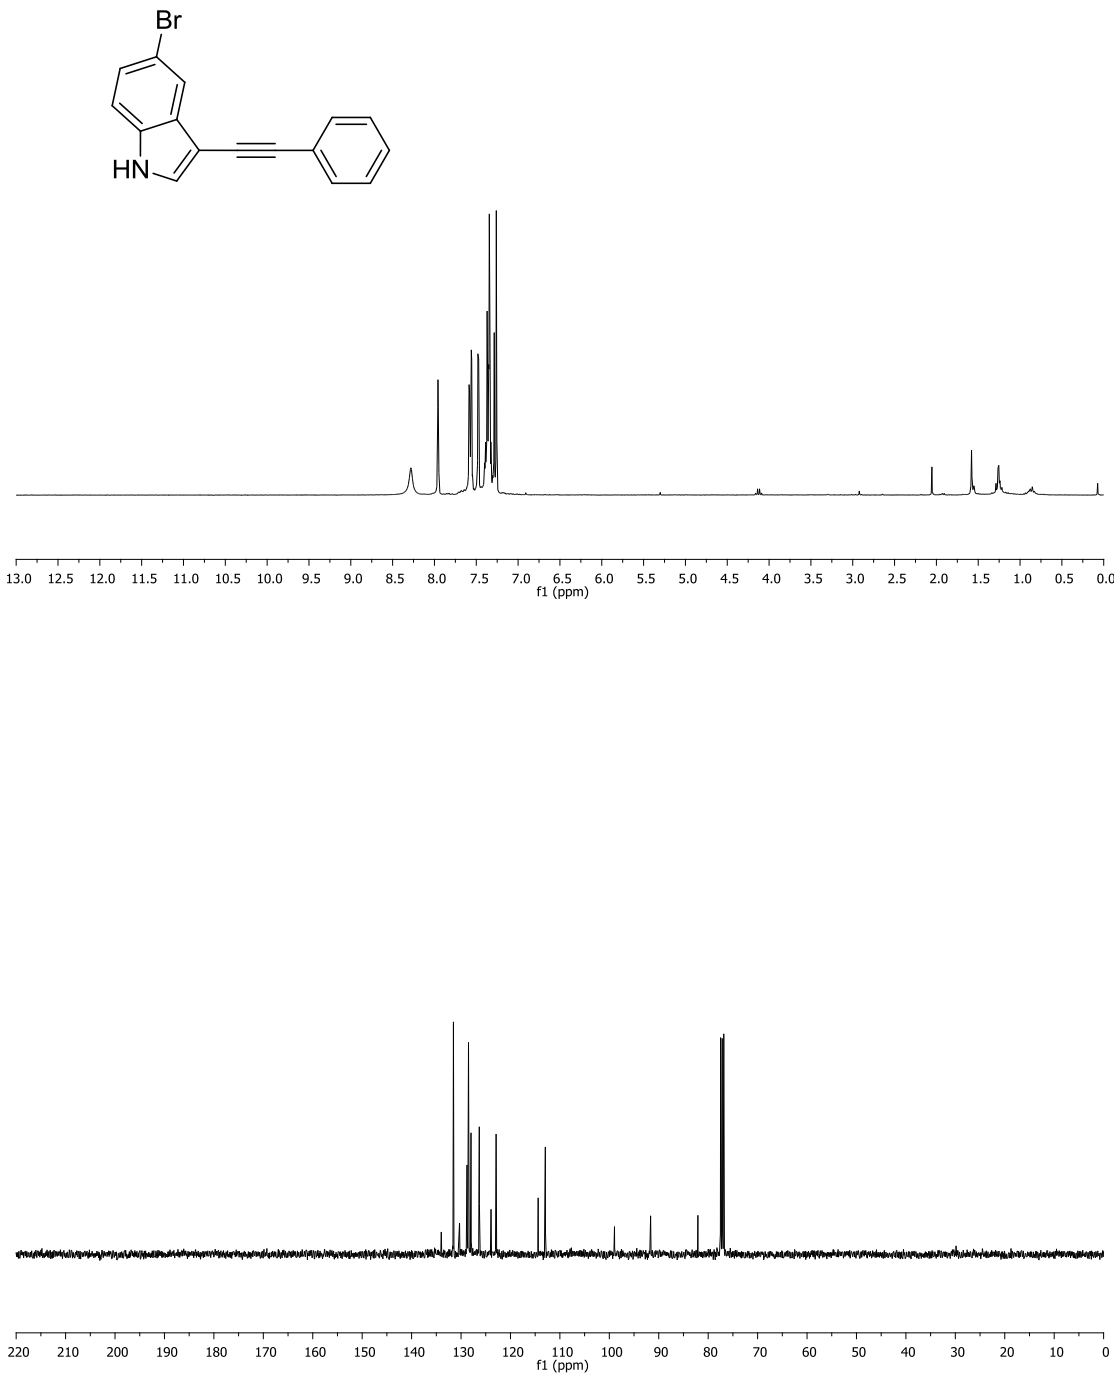

Compound 1l

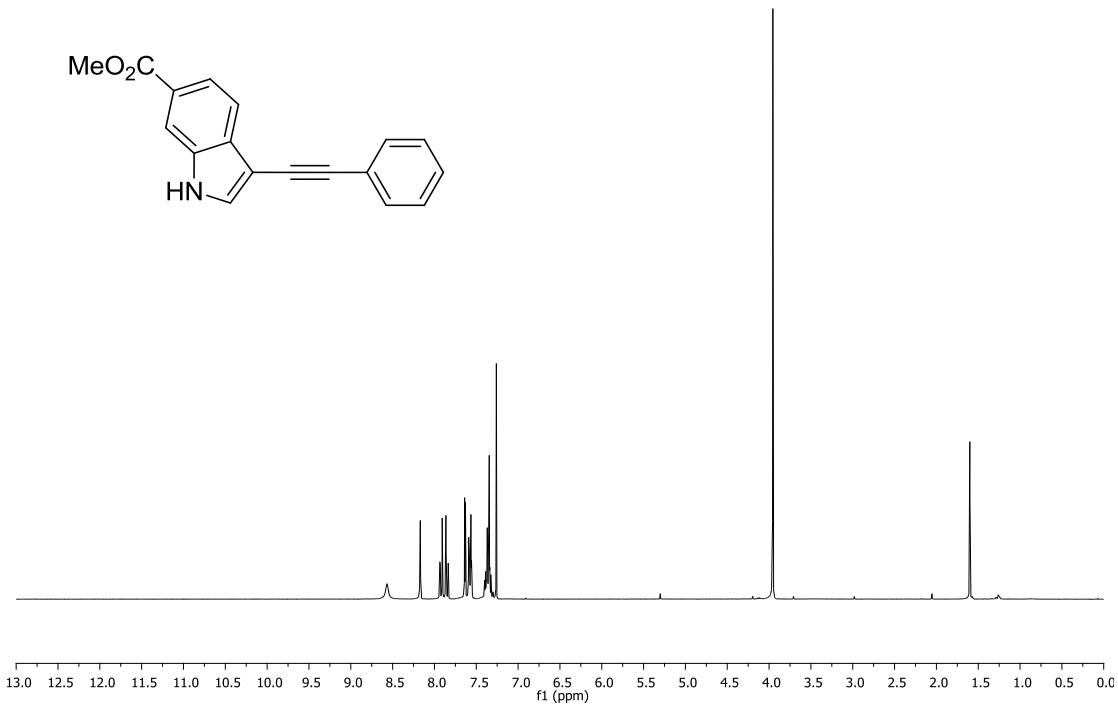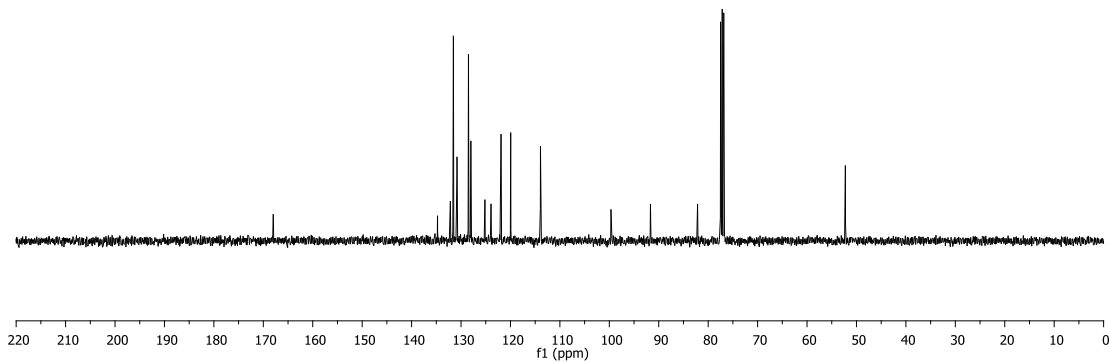

Compound 2a

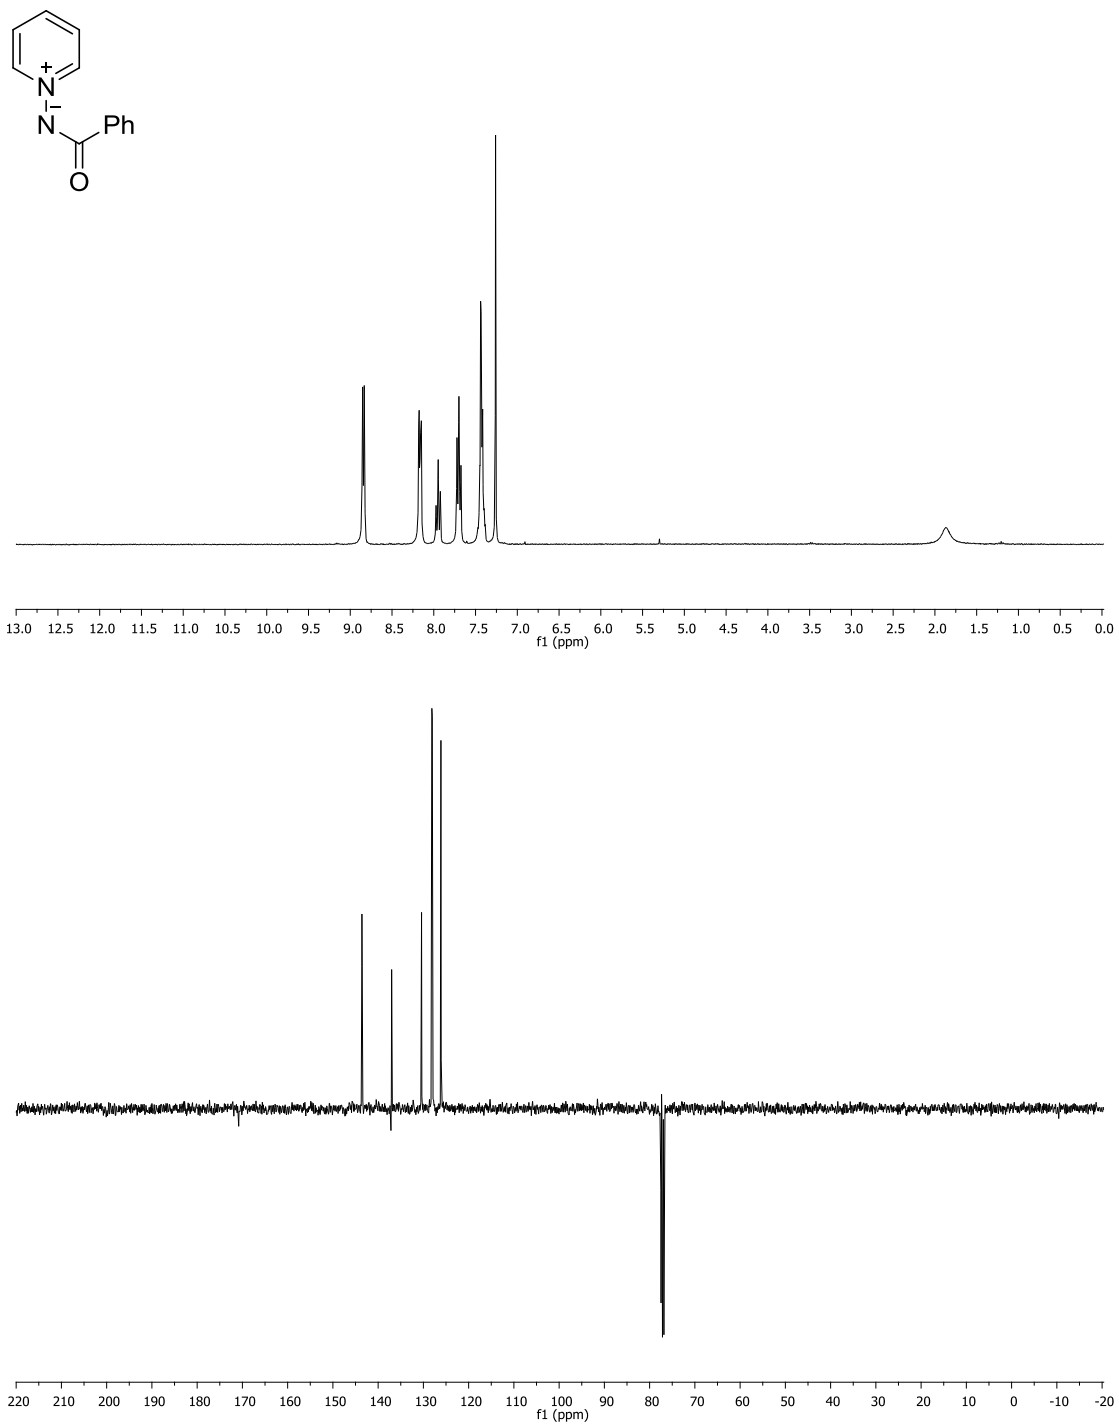



Compound 2b

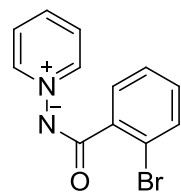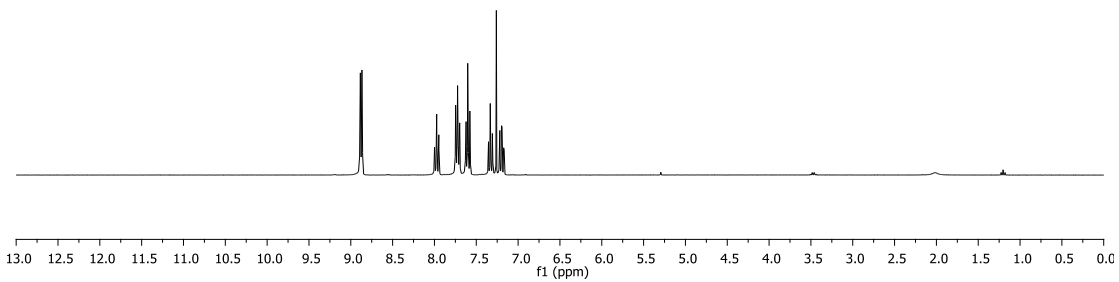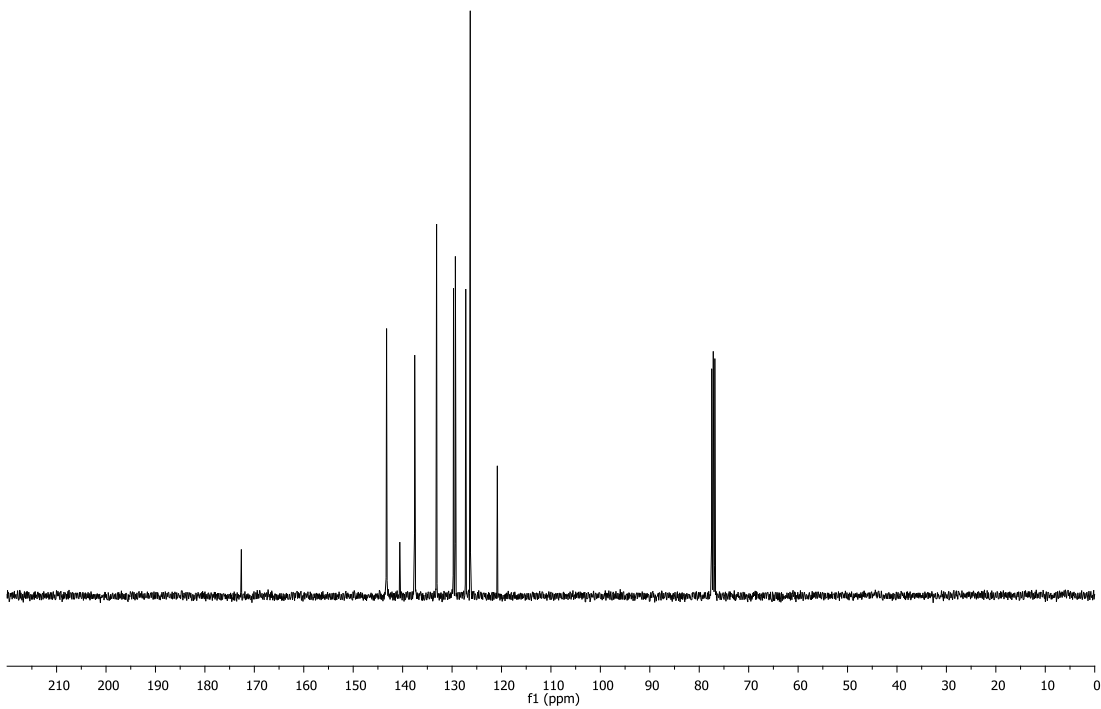

Compound 2c

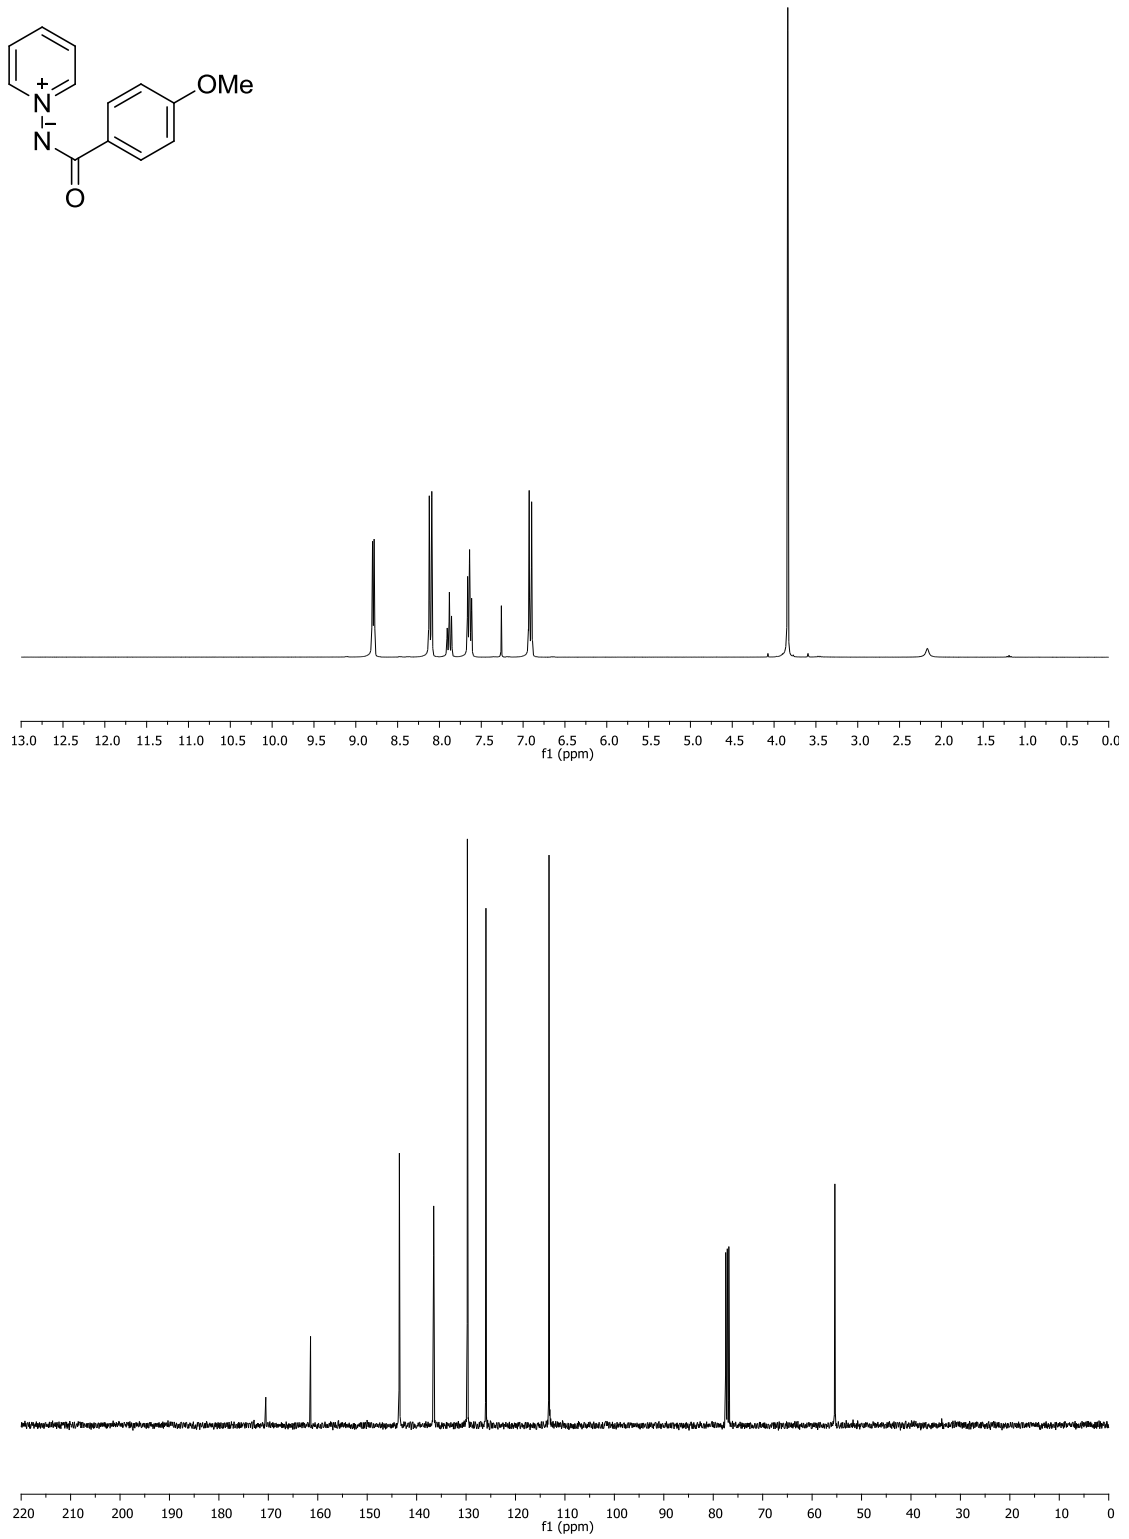

Compound 2d

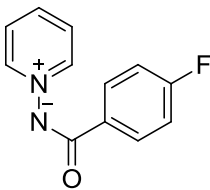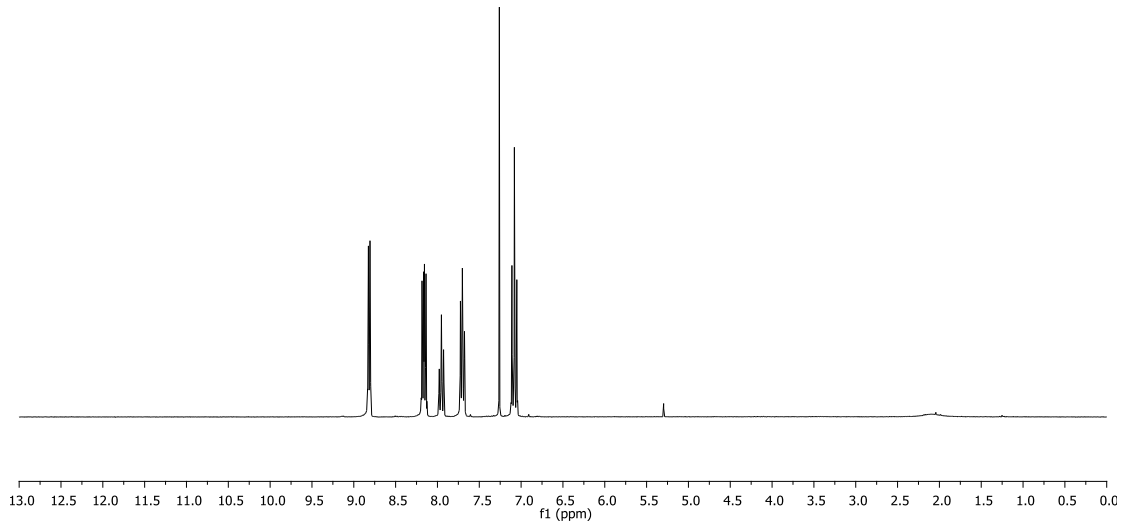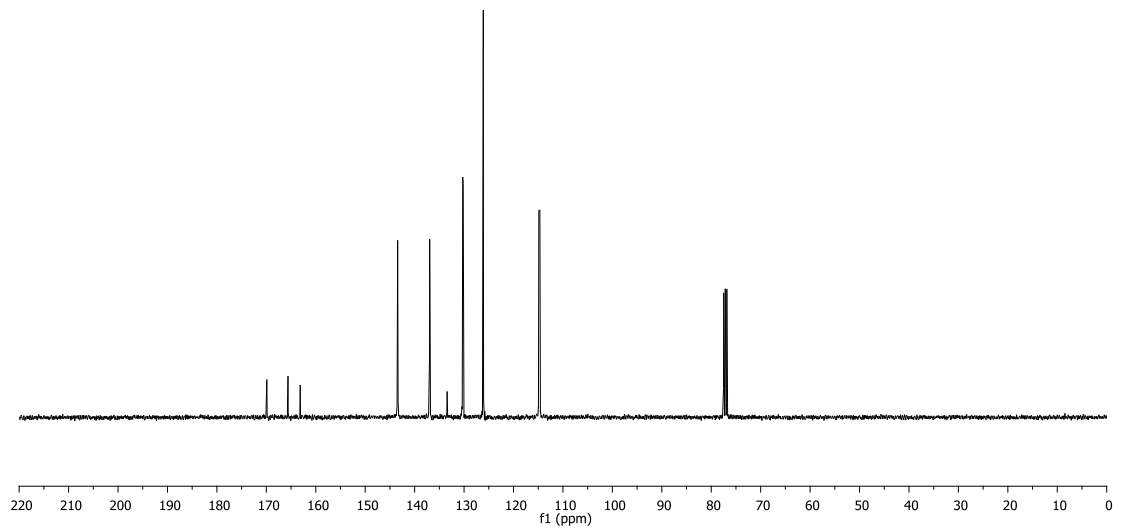

Compound 2e

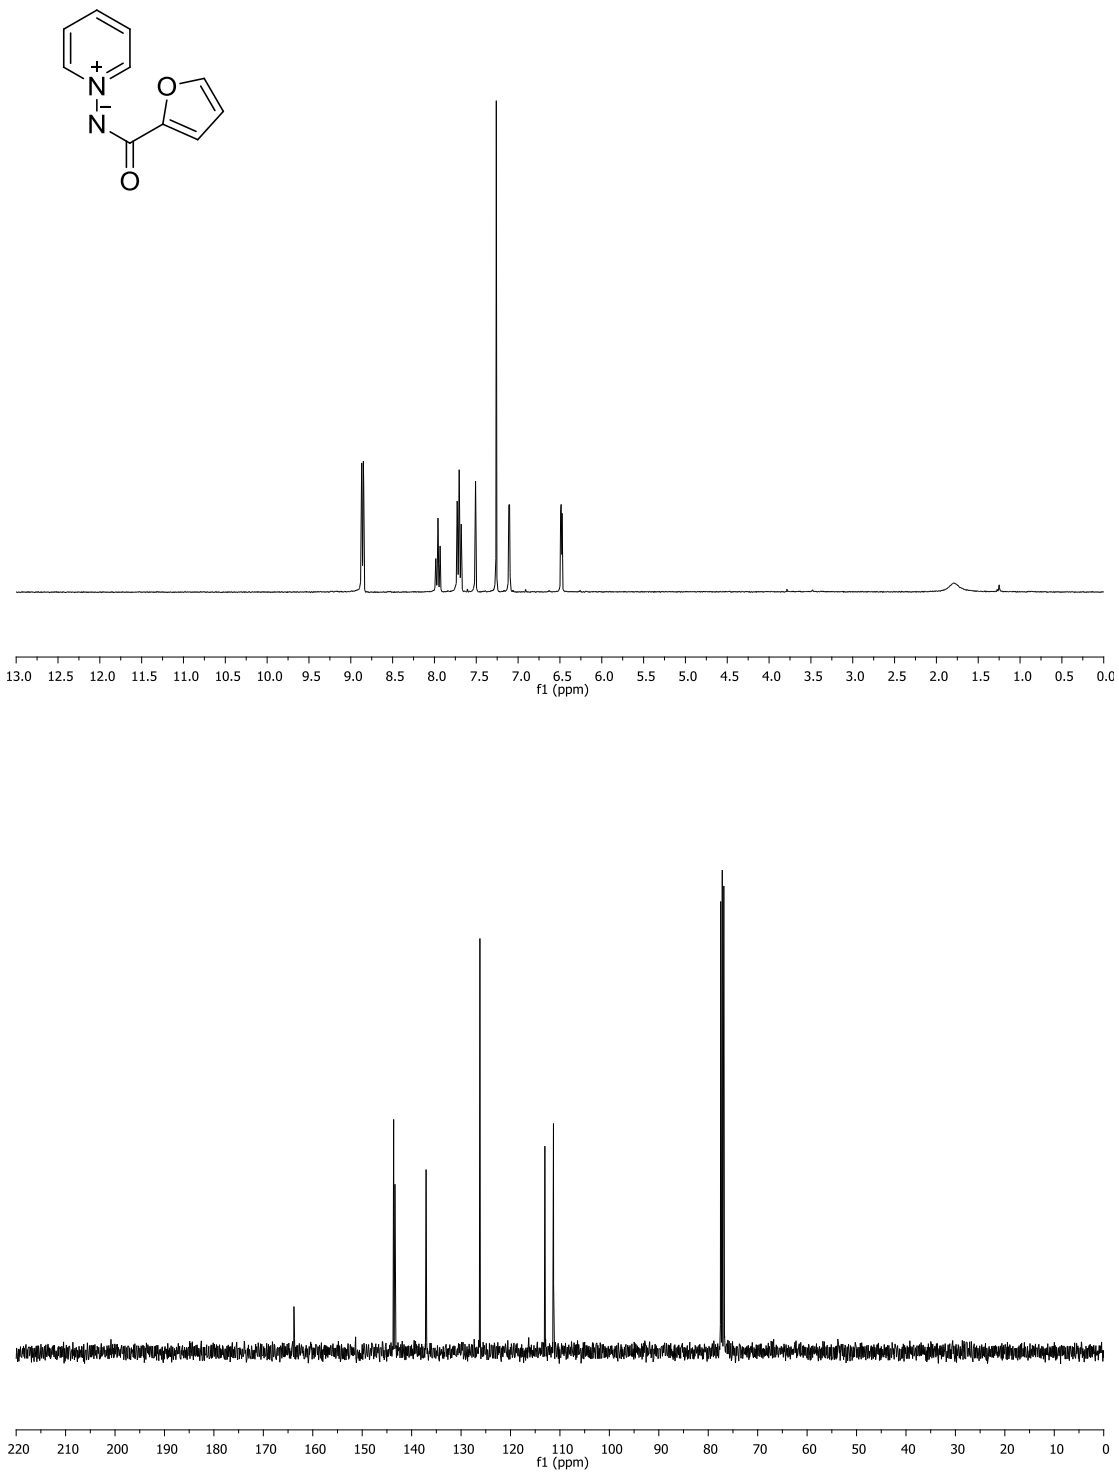

Compound 2f

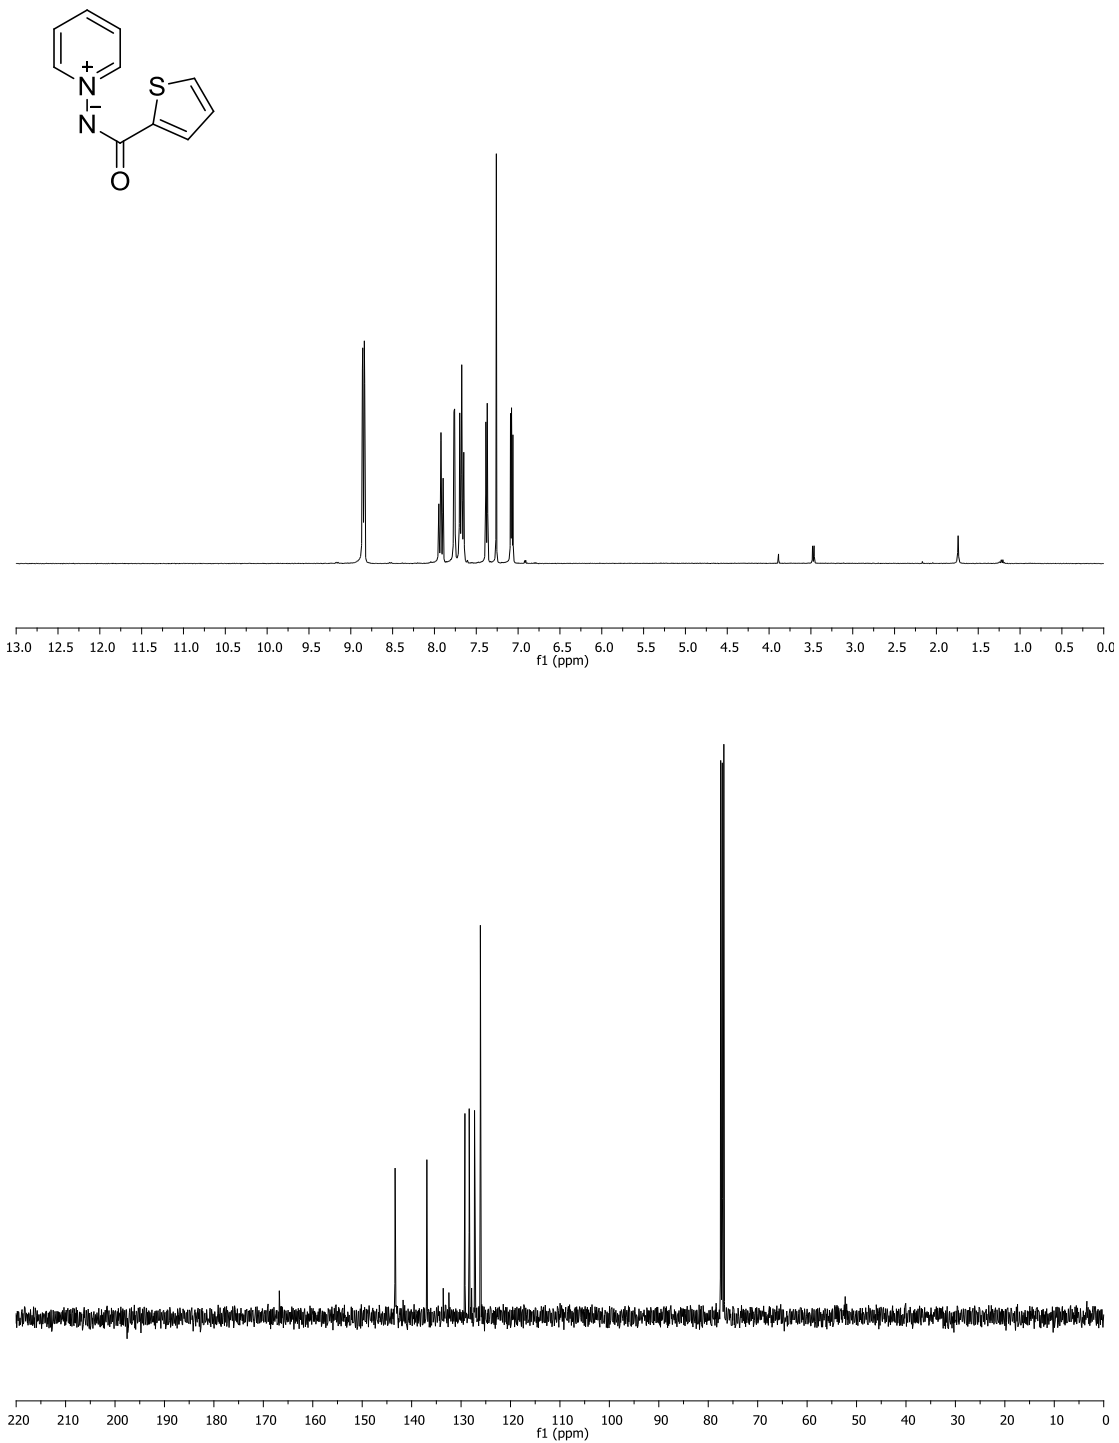

Compound 2aII

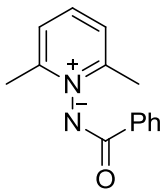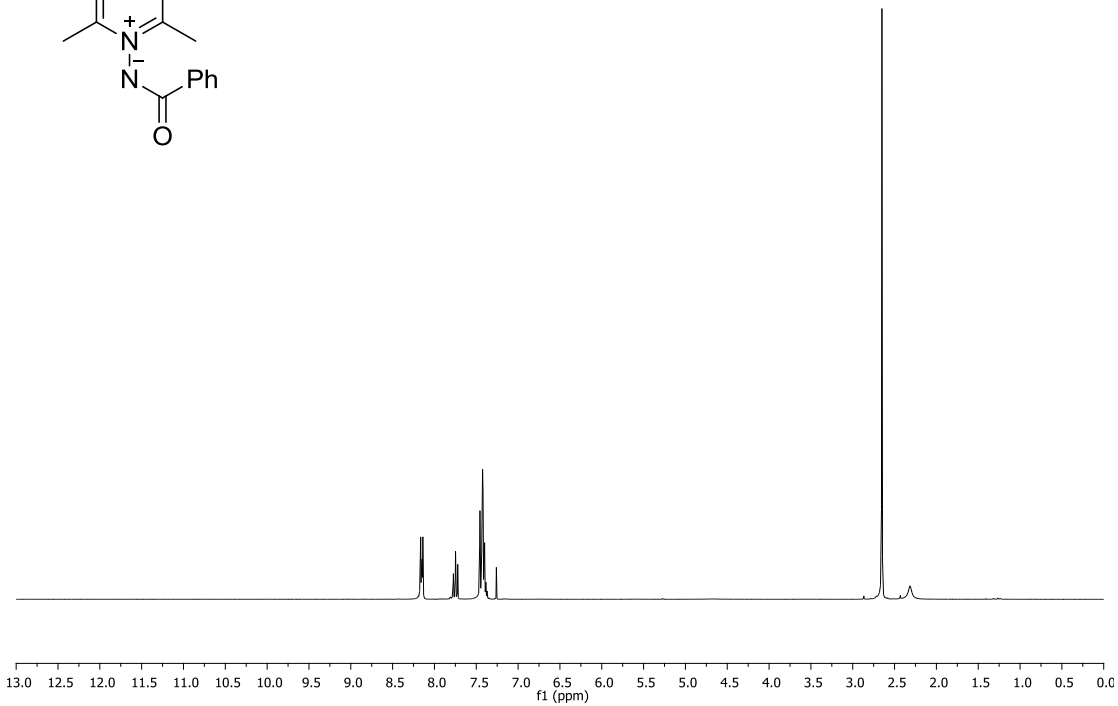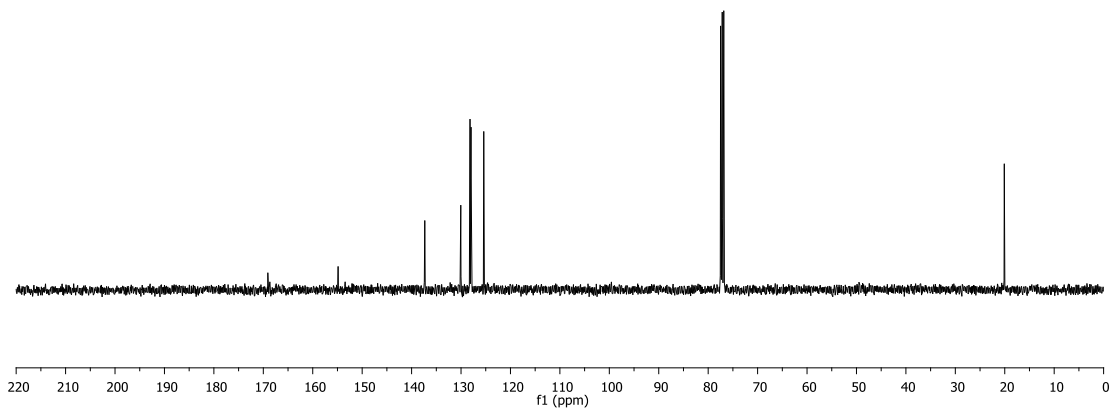

Compound 2aIII

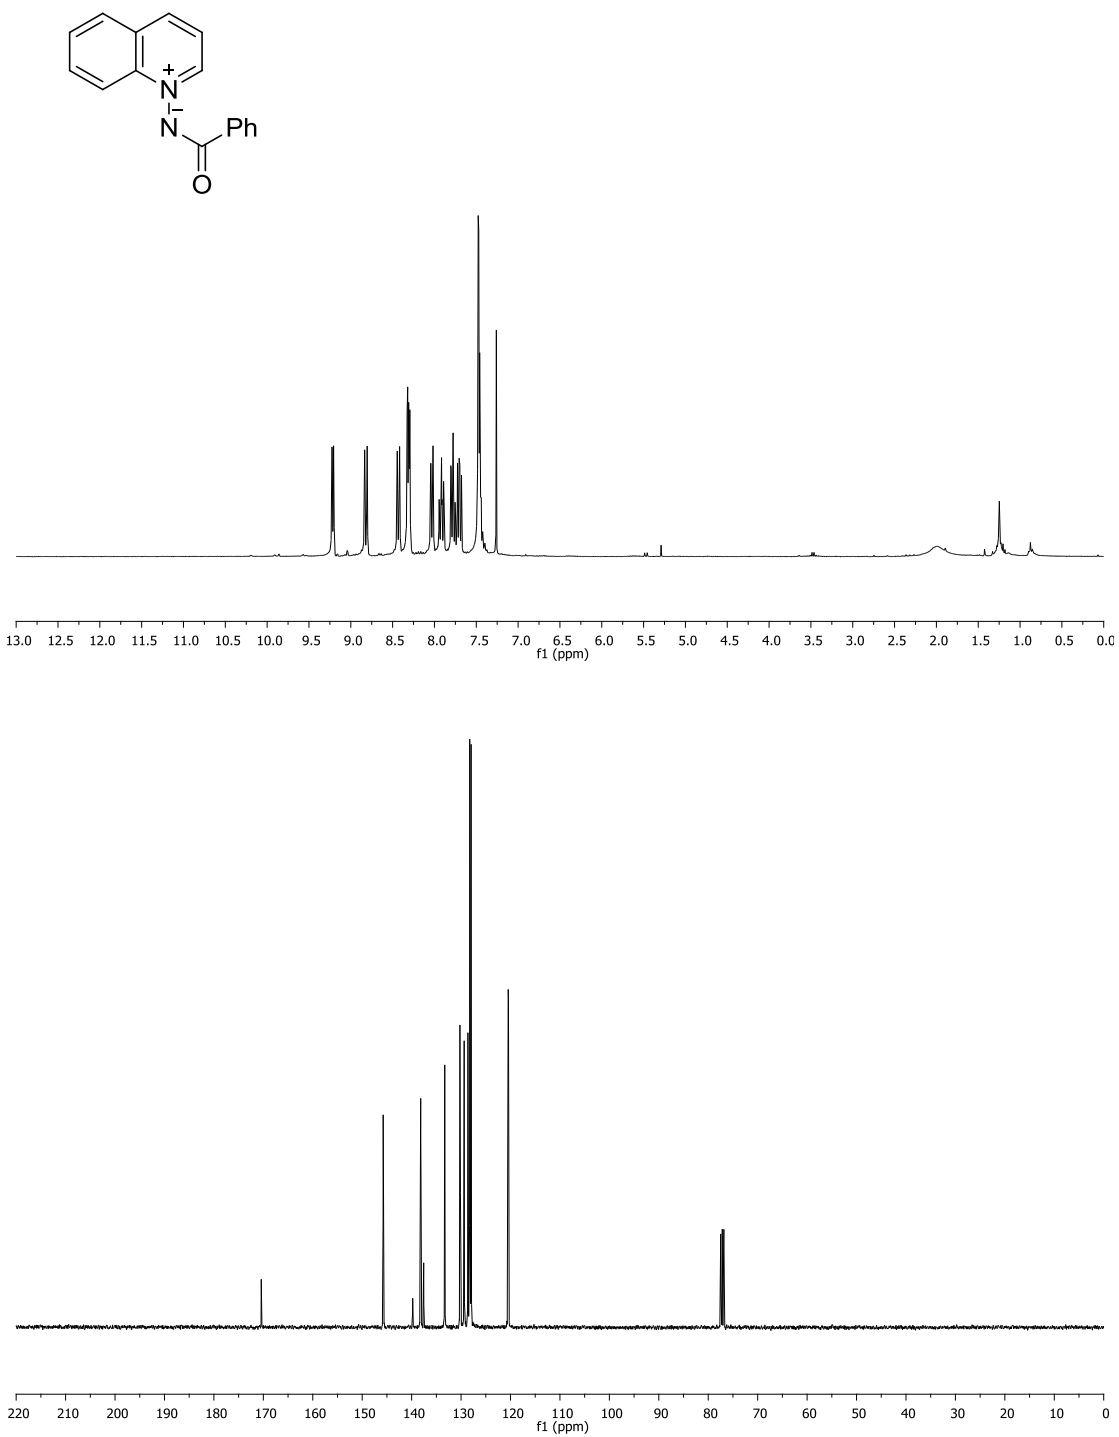

Compound 2aIV

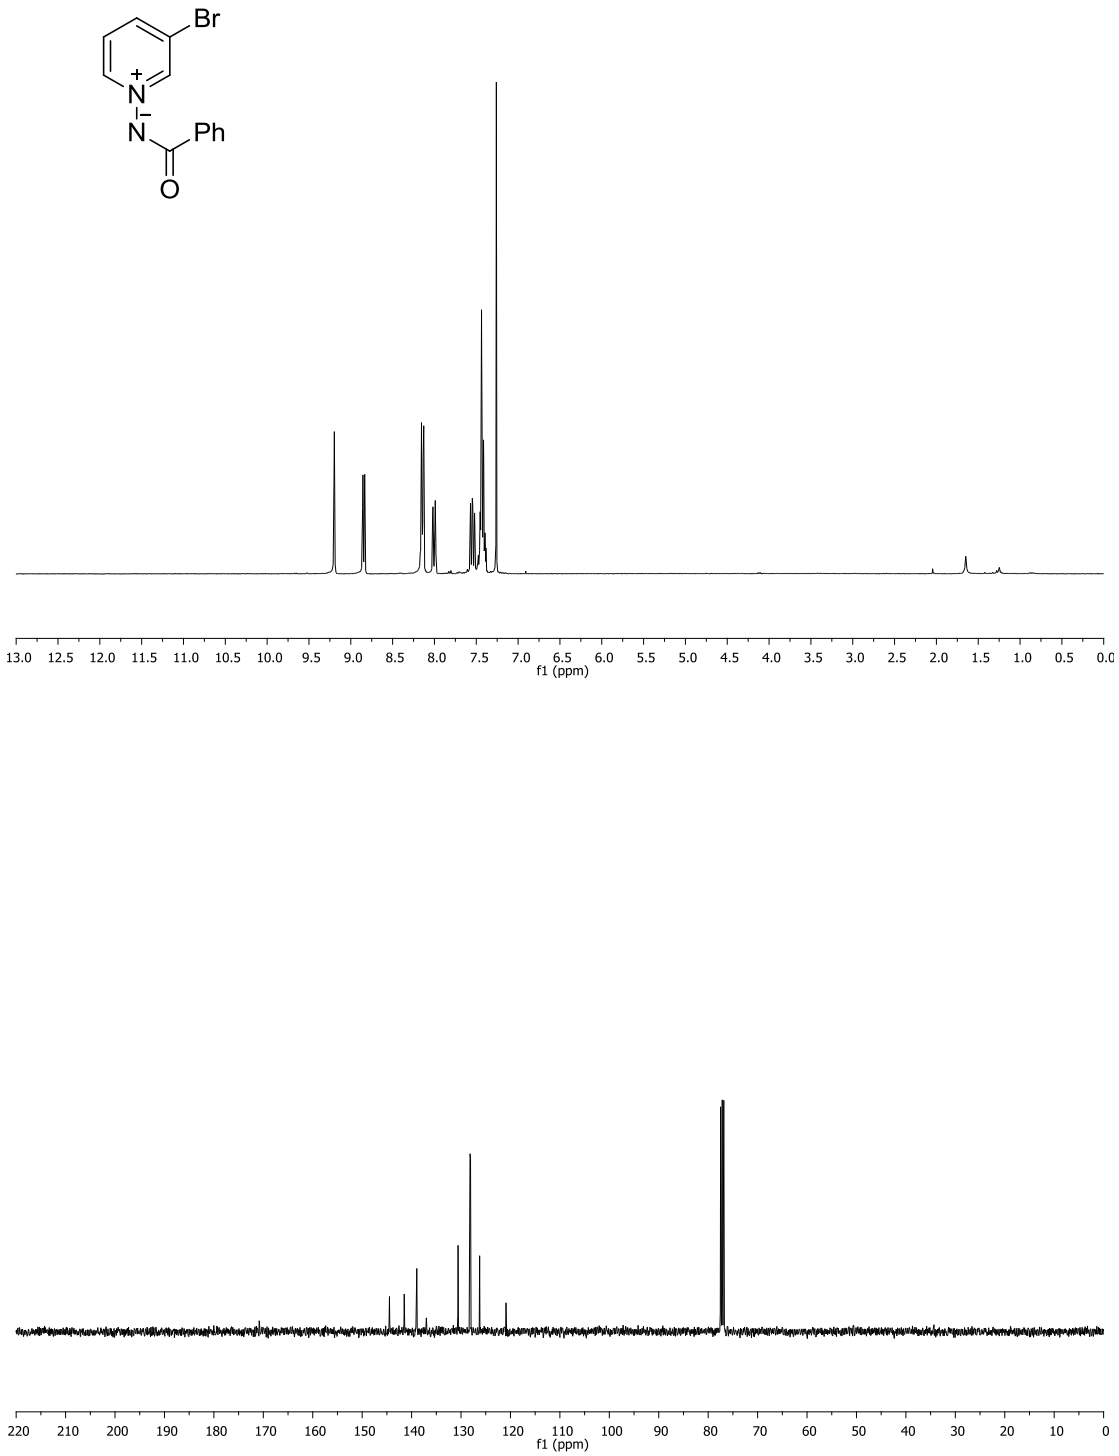



Compound 2aV

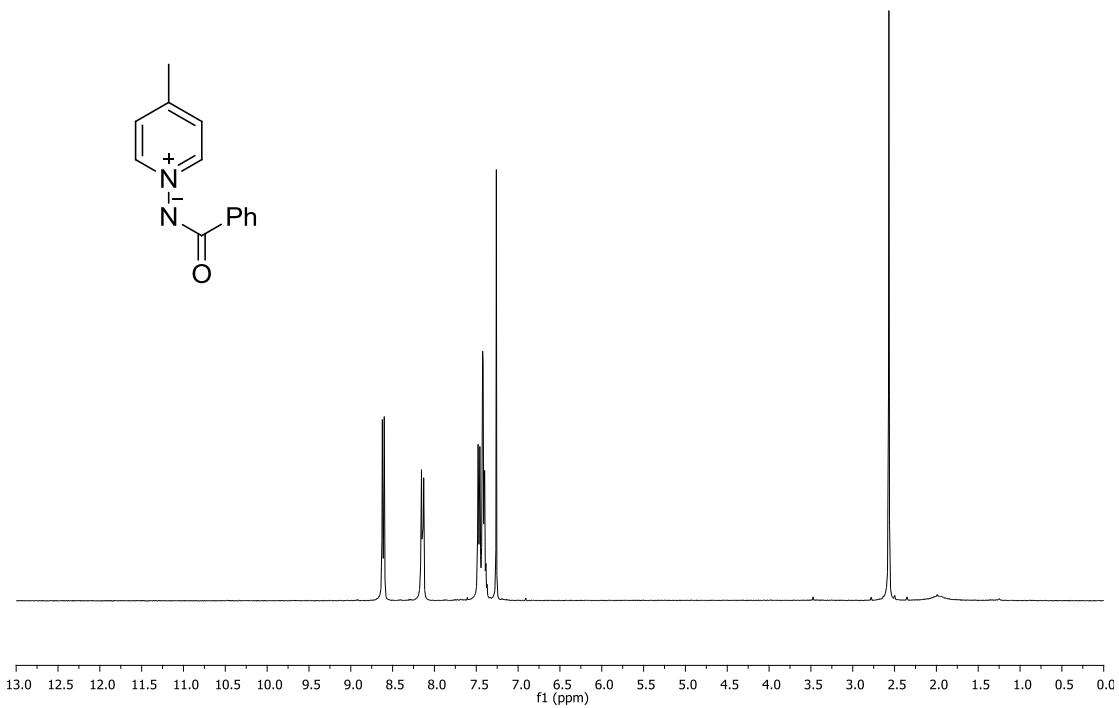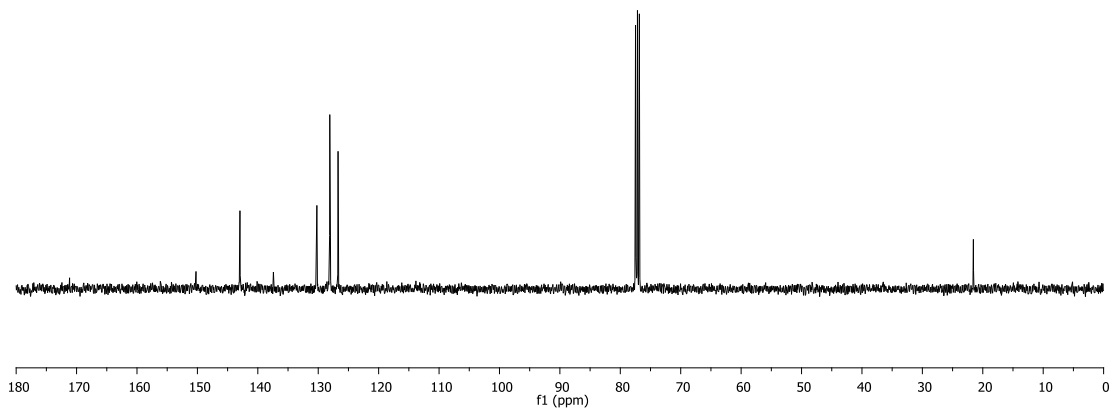

Compound 4a

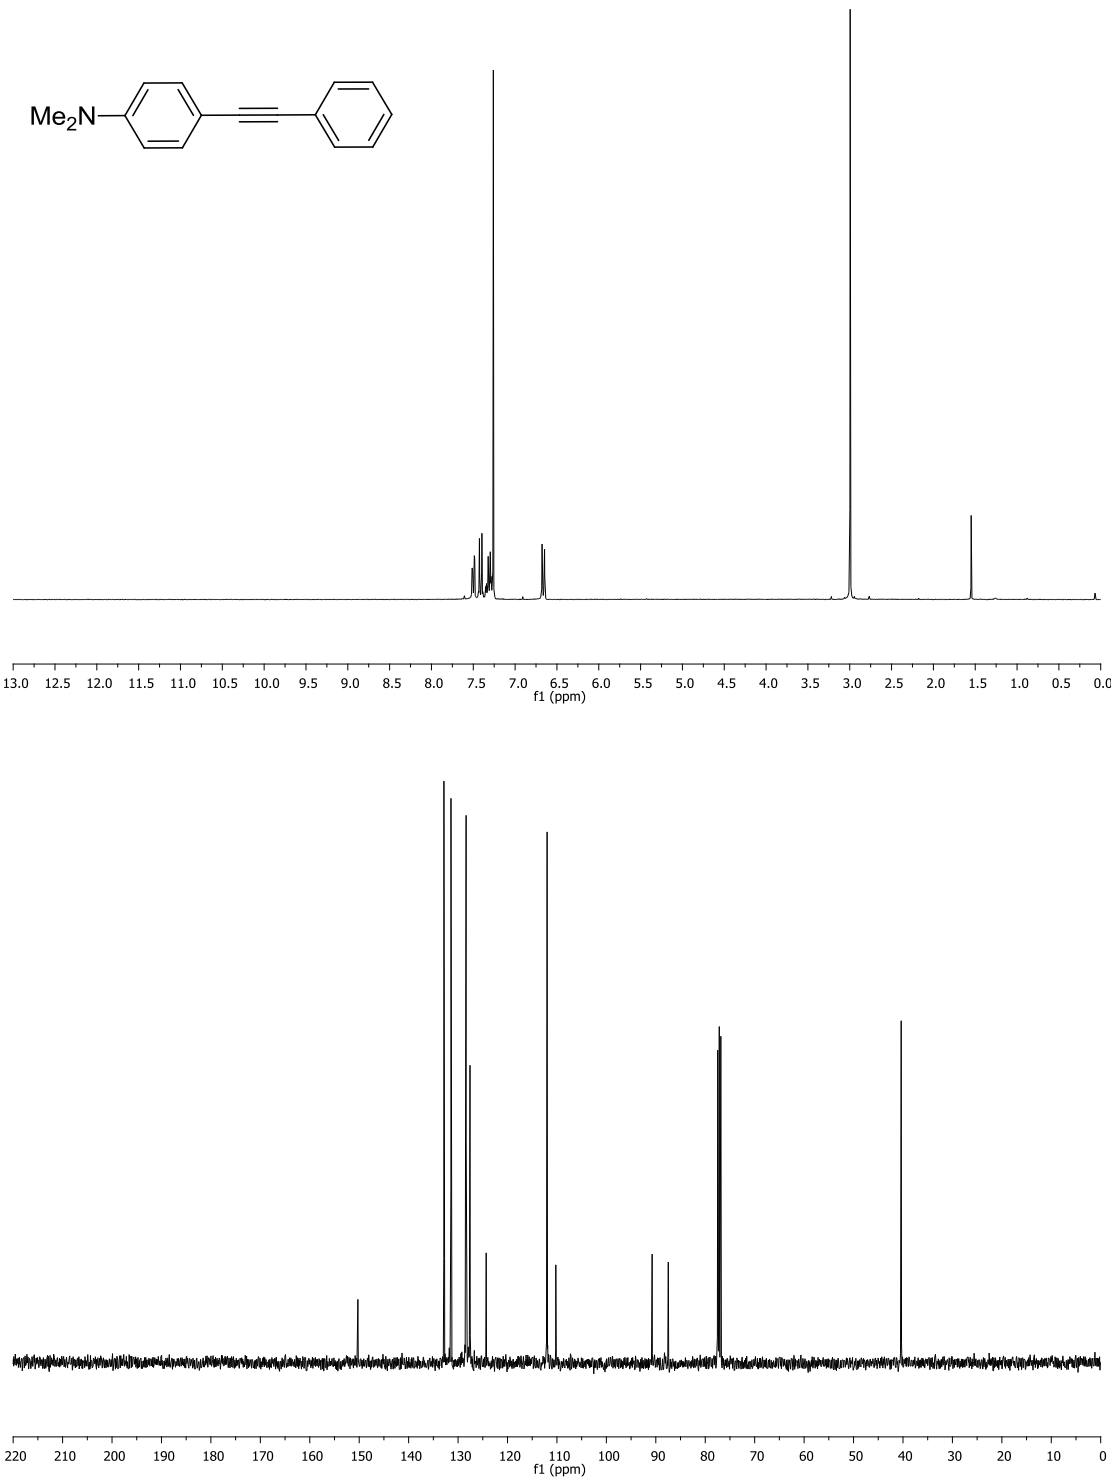

Compound 4b

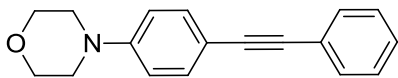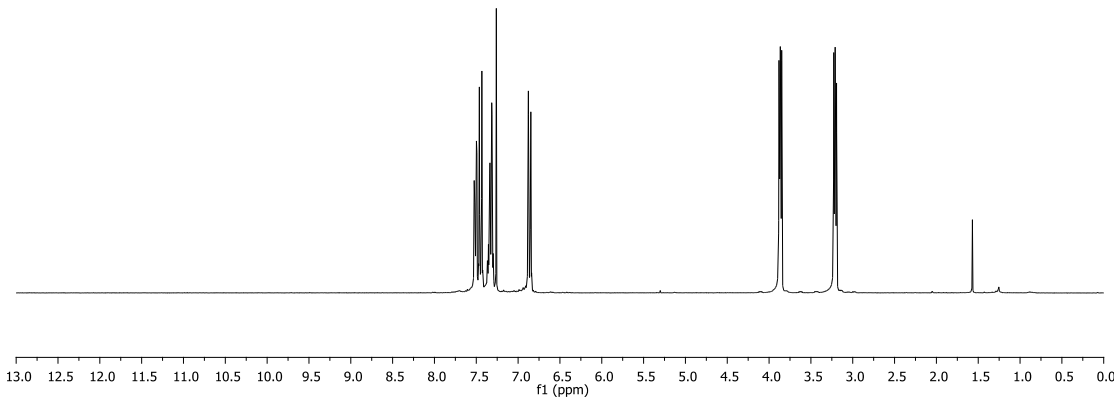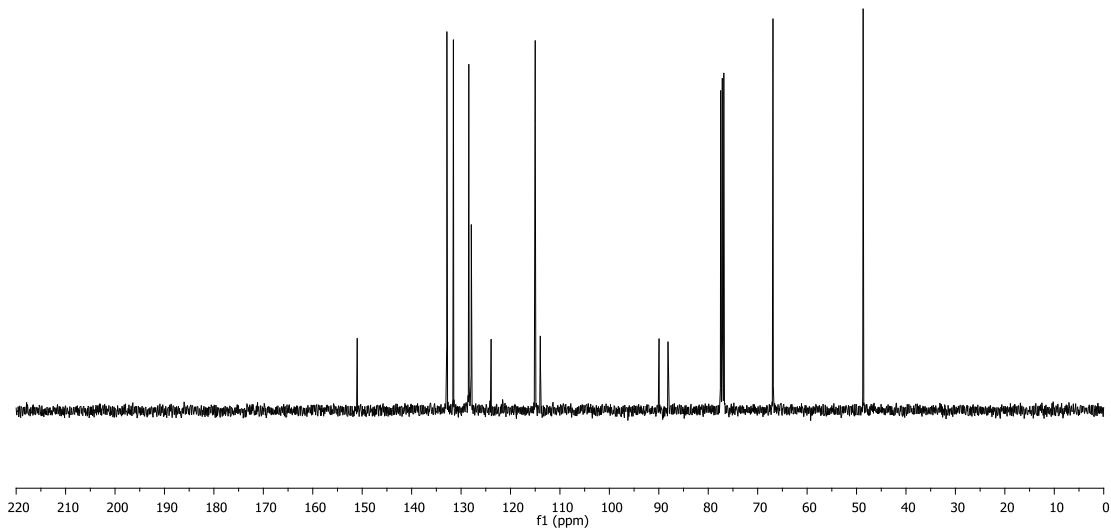

Compound 4c

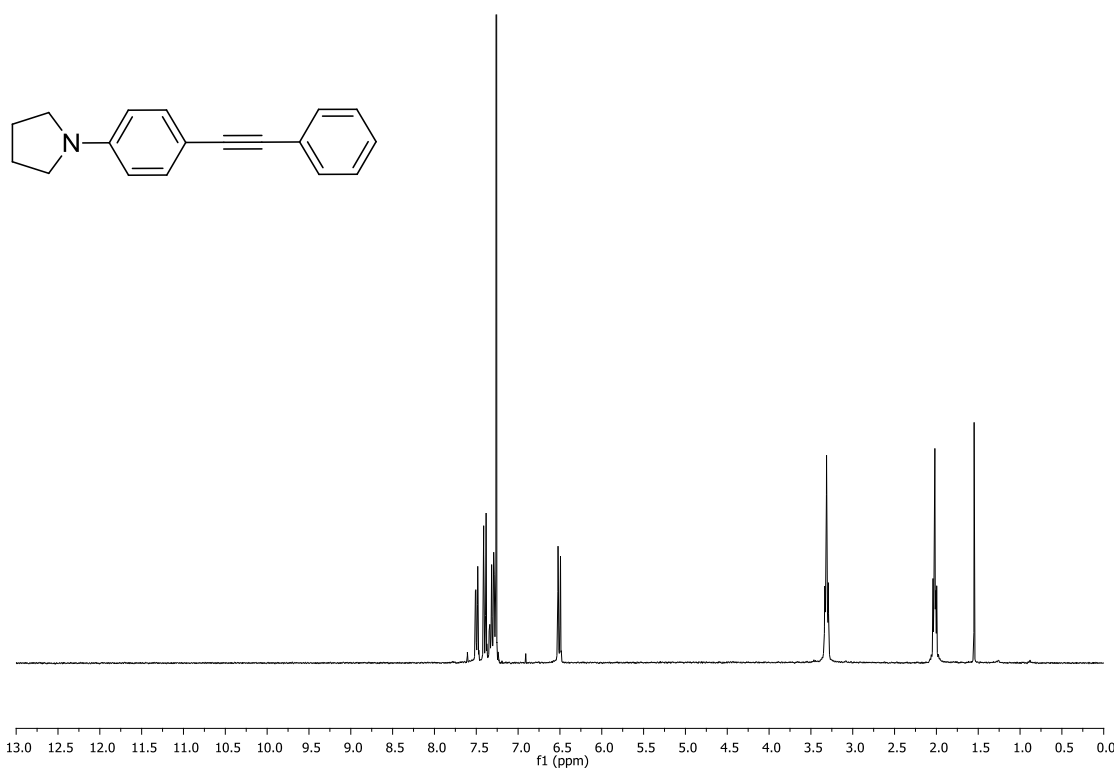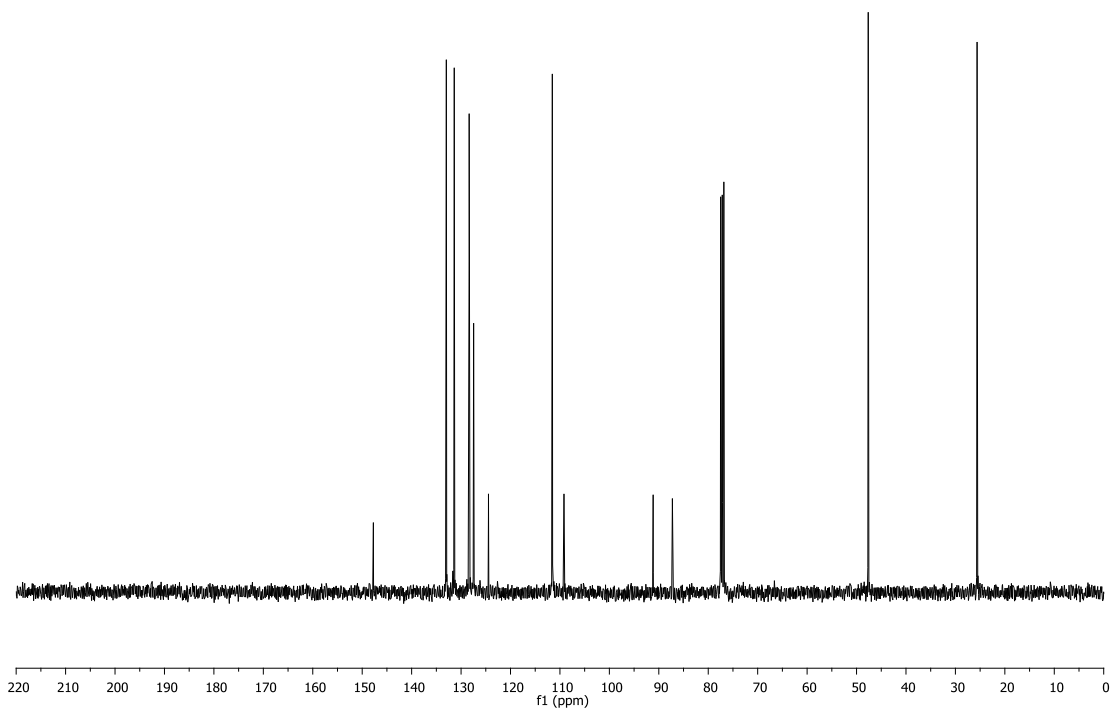

Compound 4d

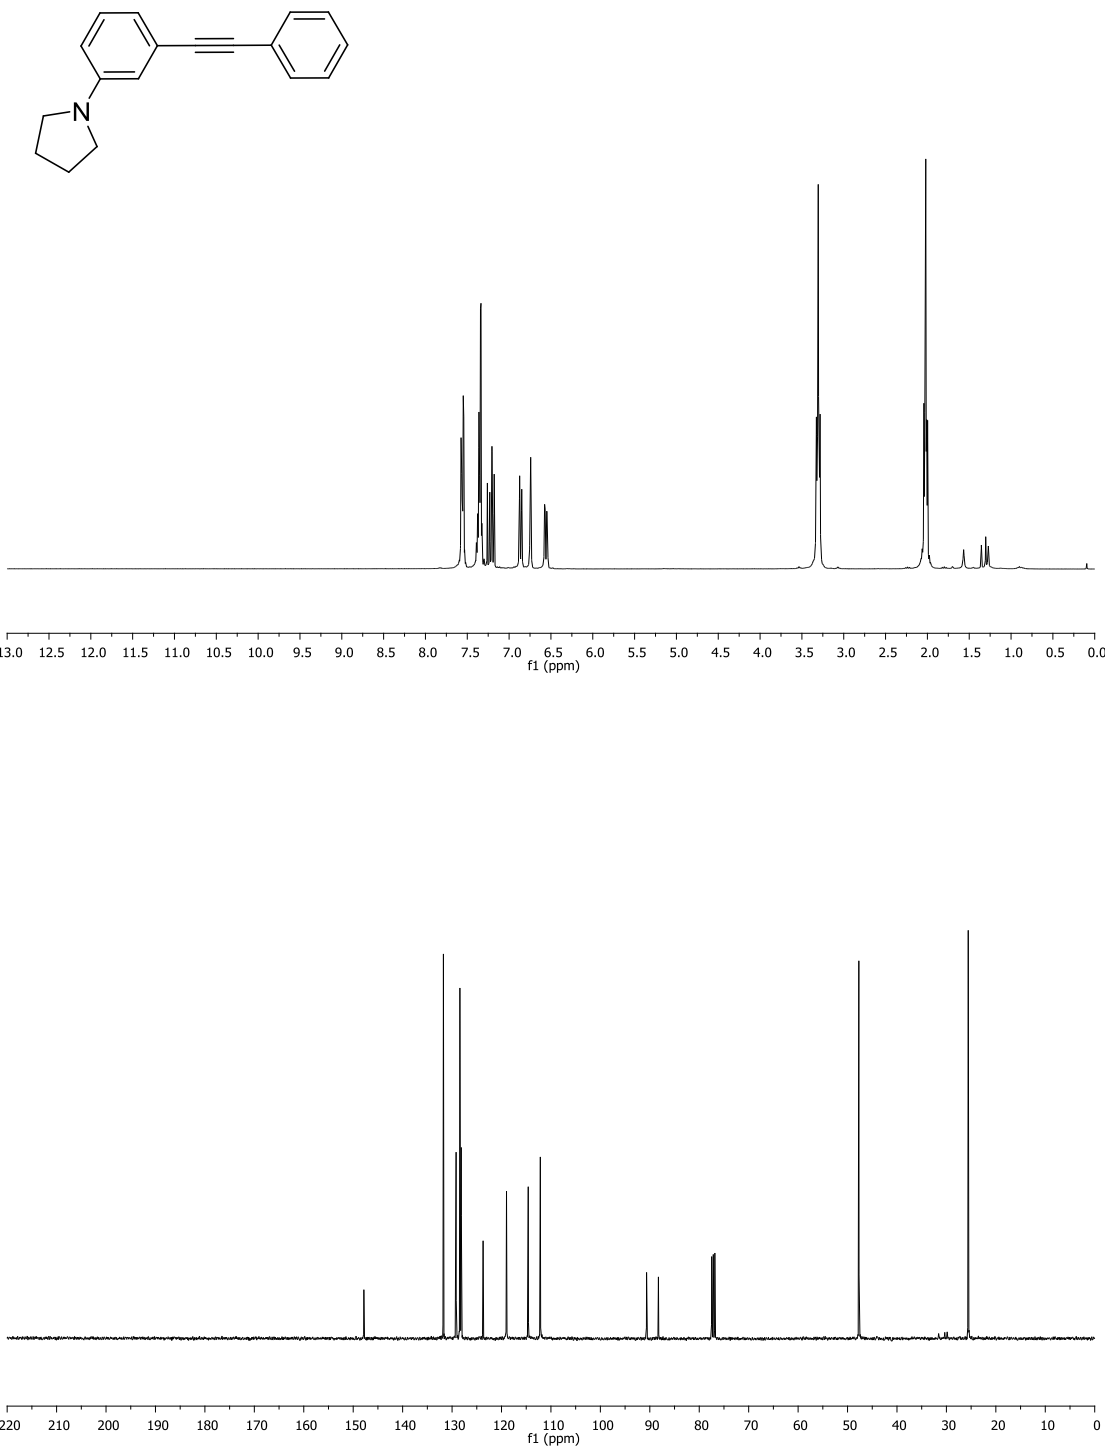

Compound 4e

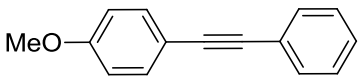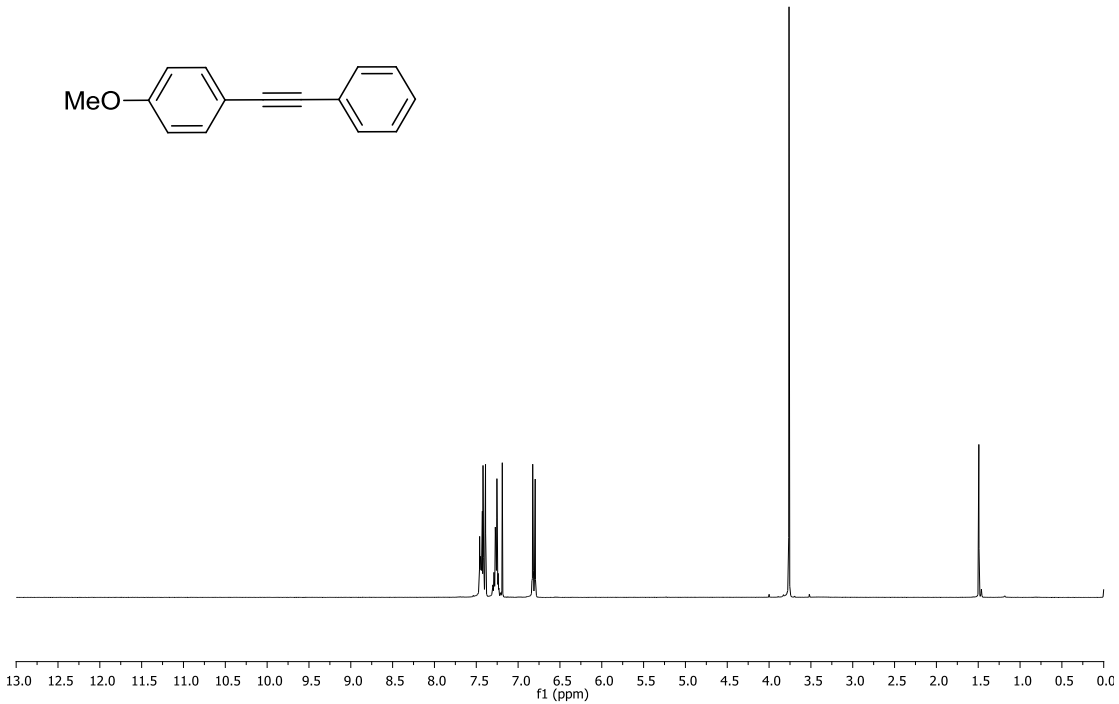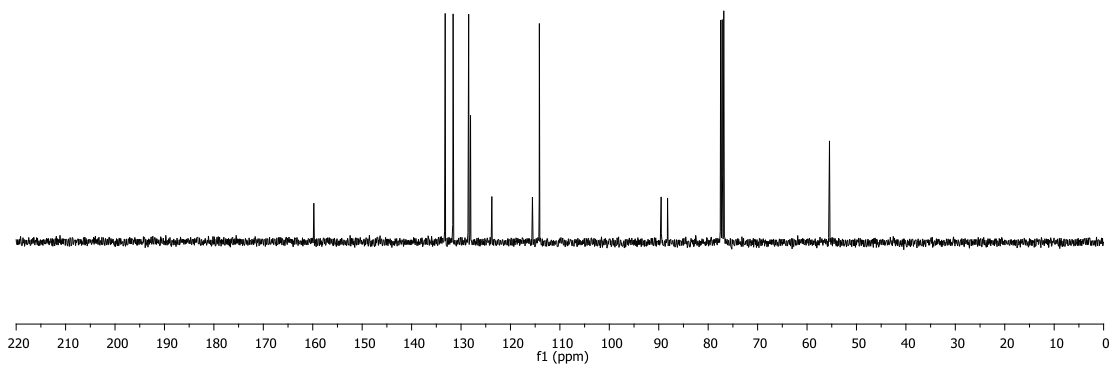

Compound 6

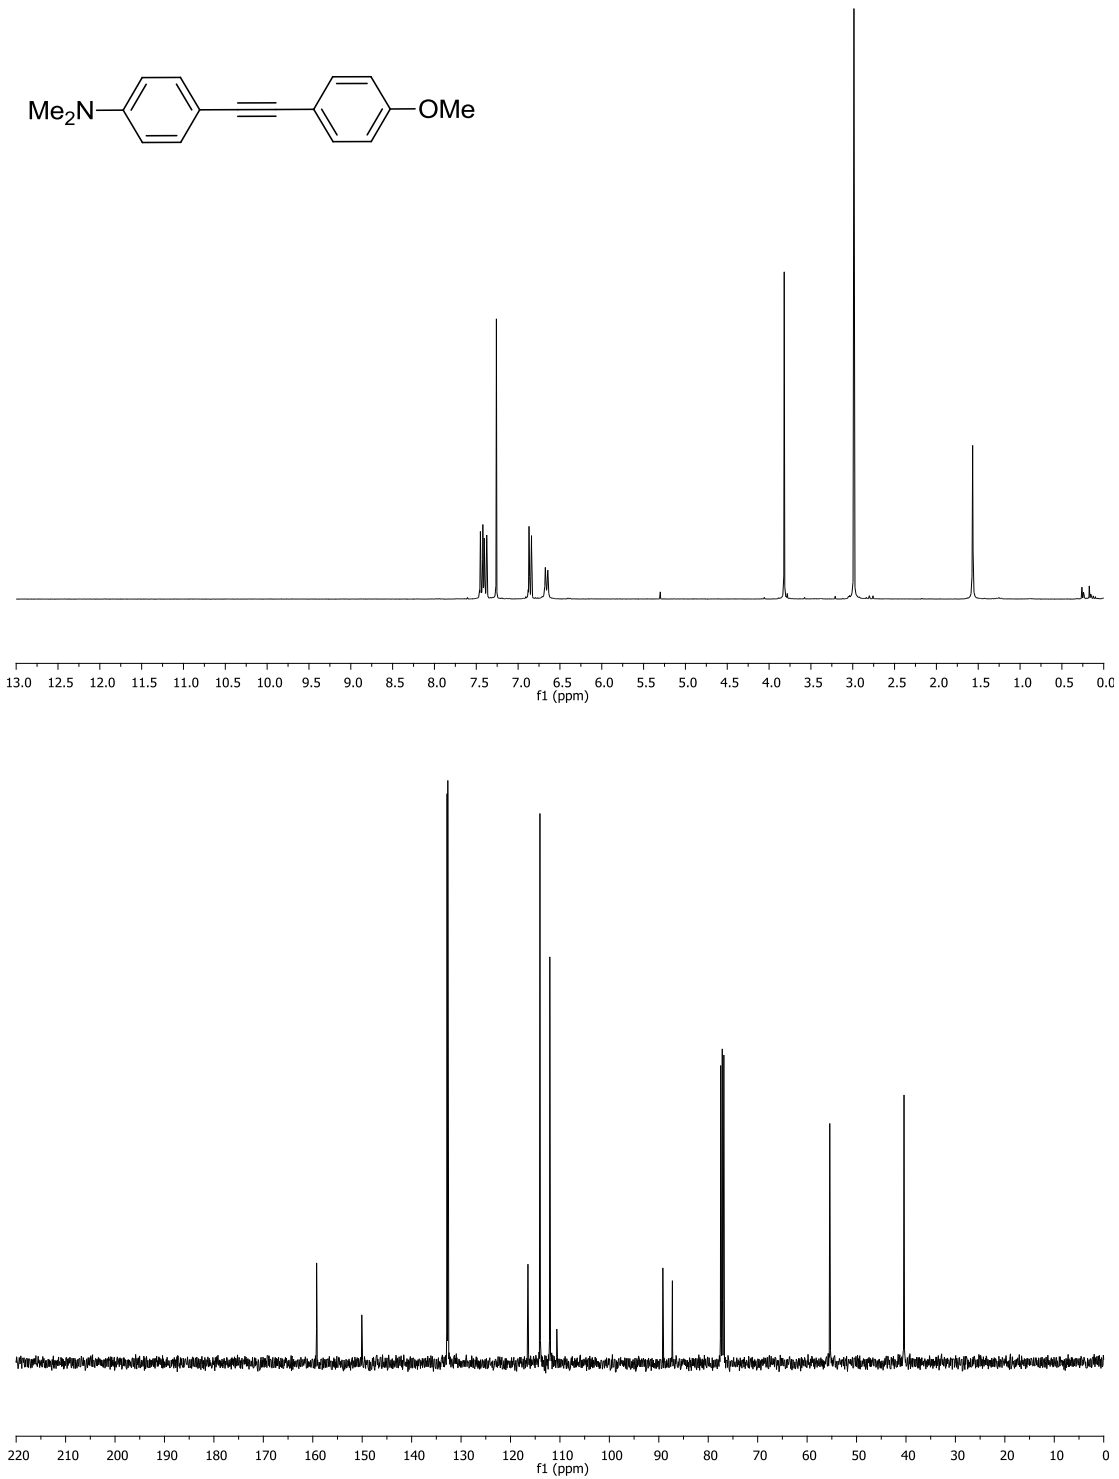

Compound 3aa

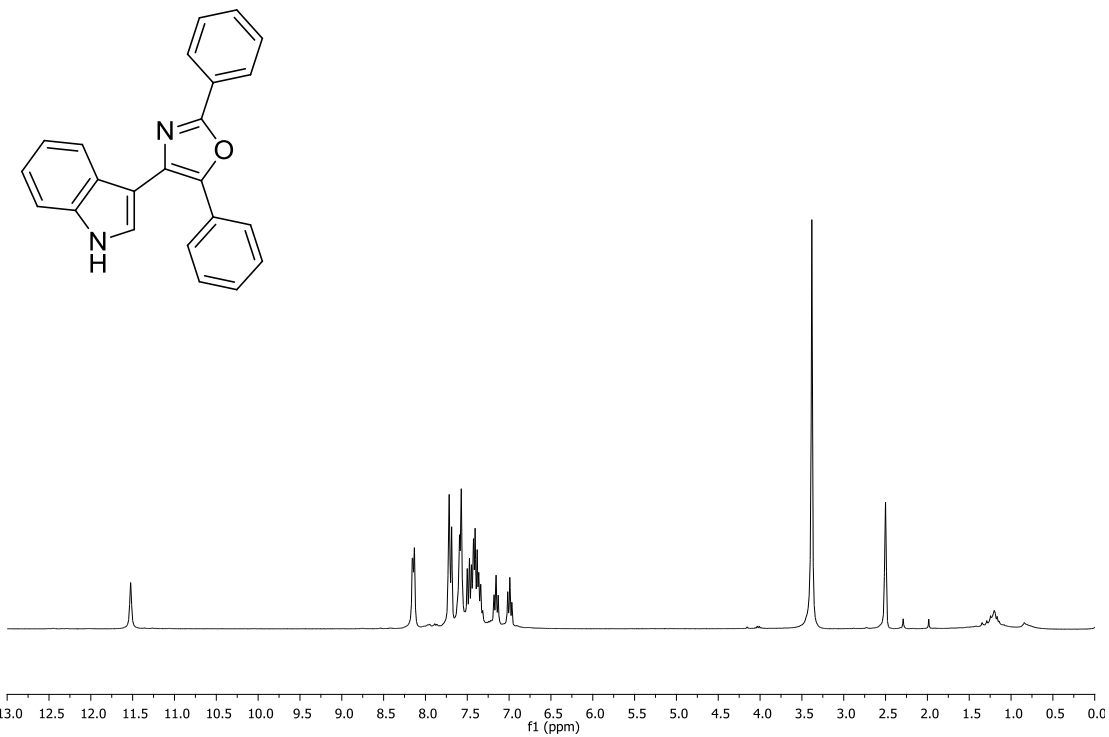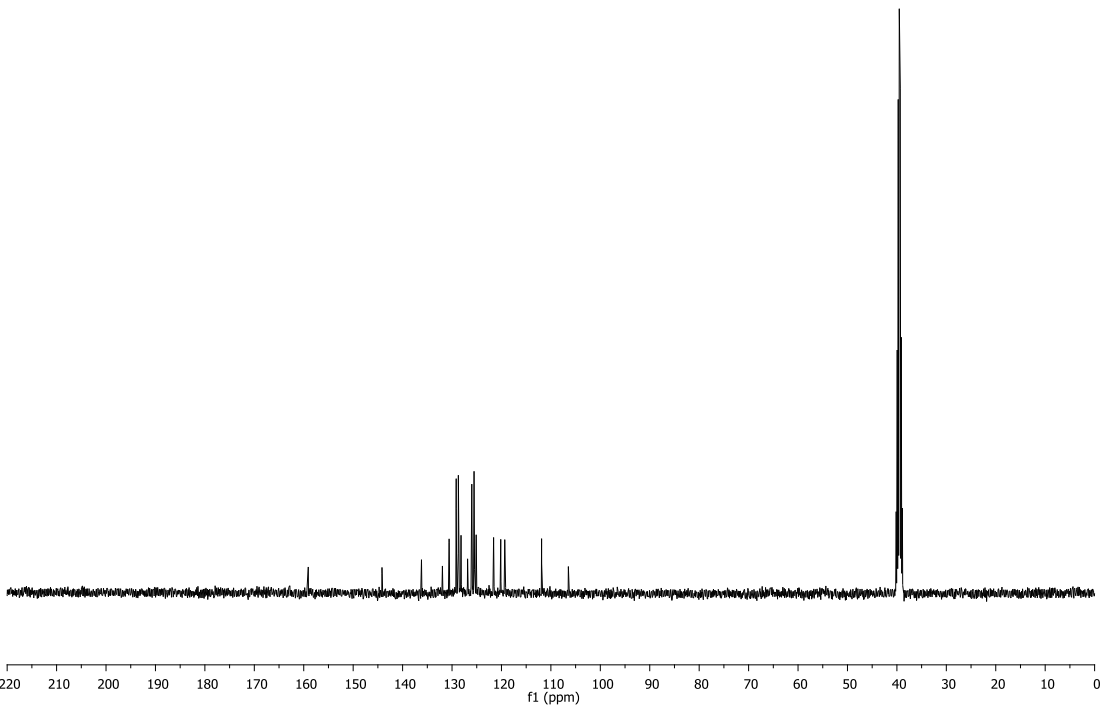



Compound 3ba

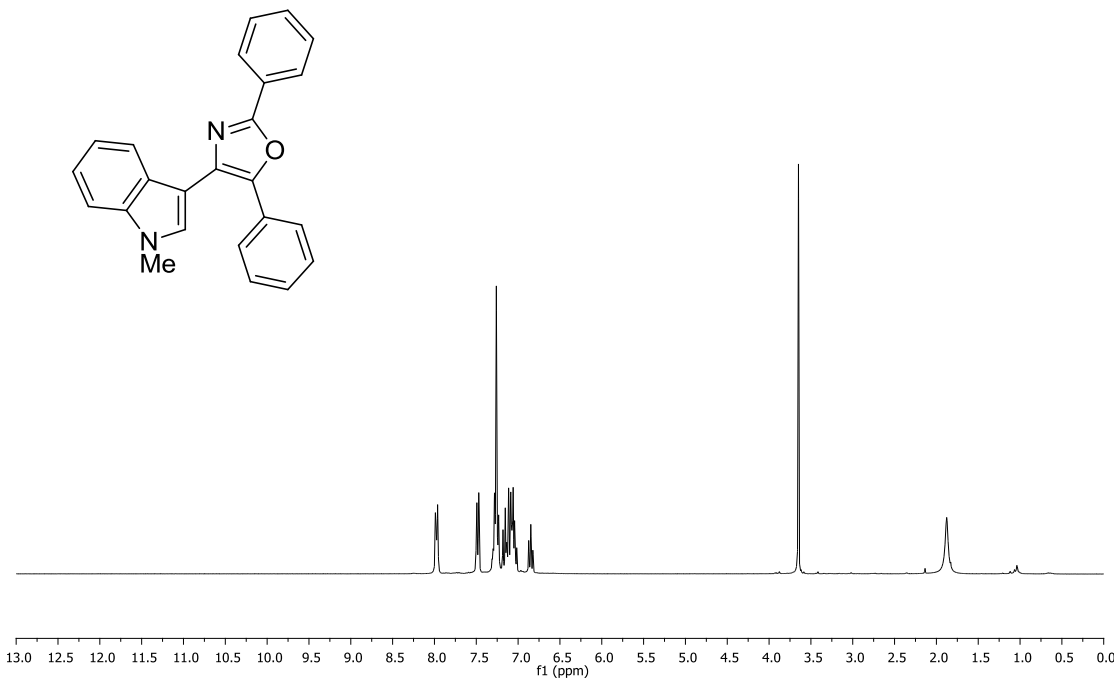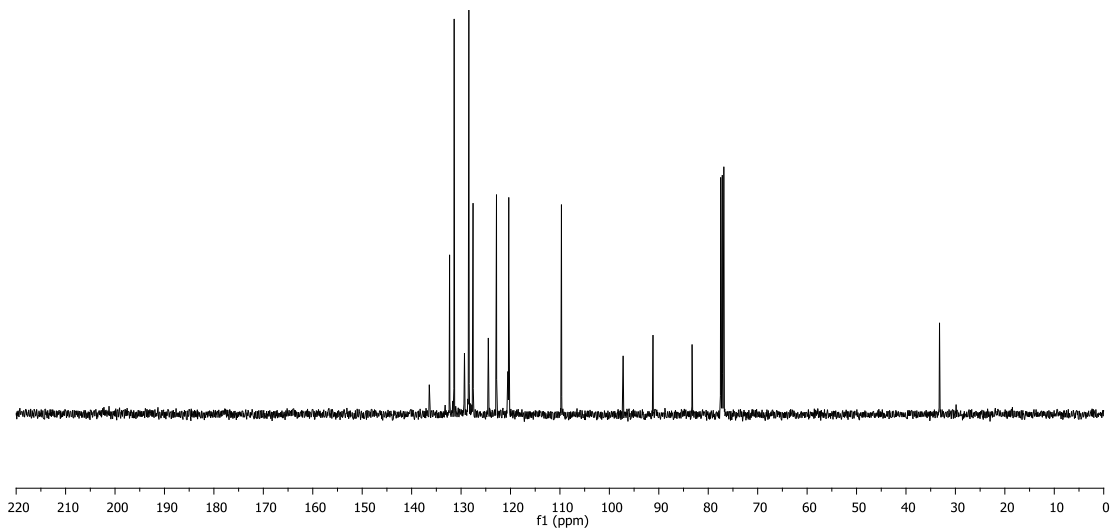

Compound 3ca

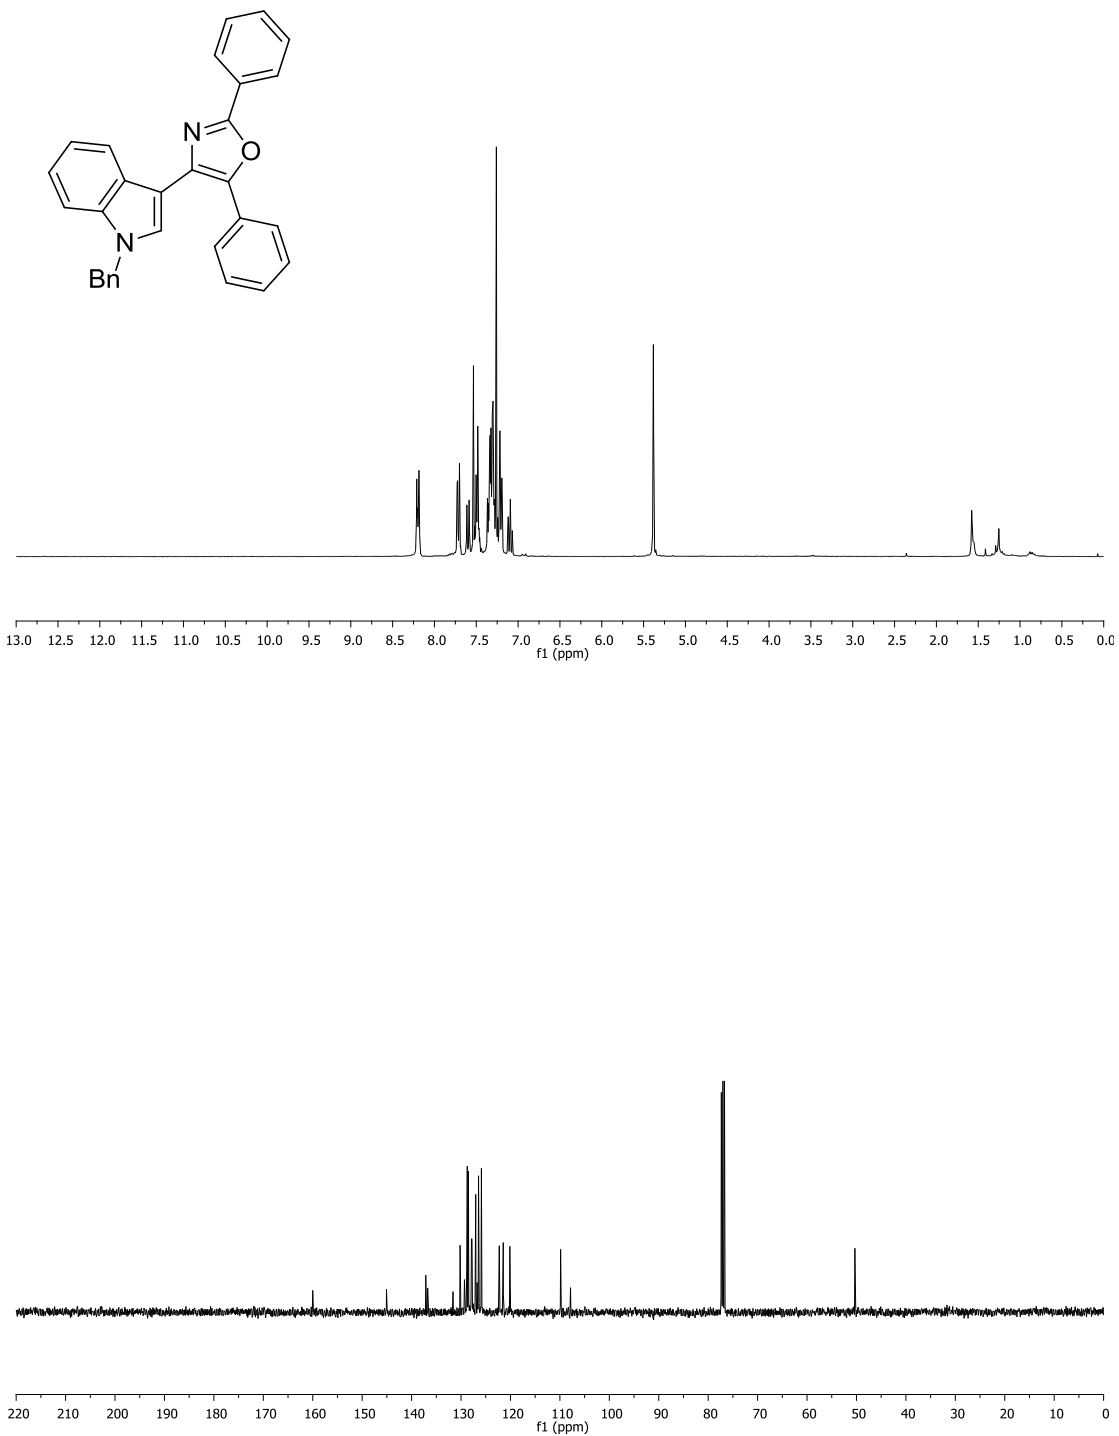

Compound 3da

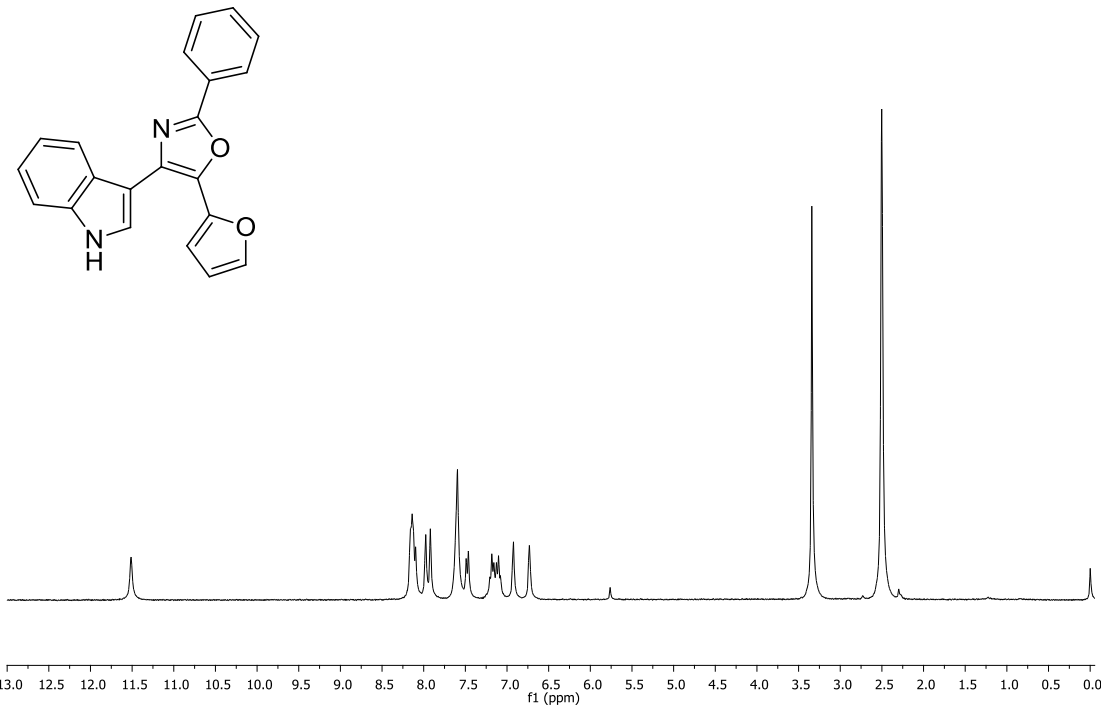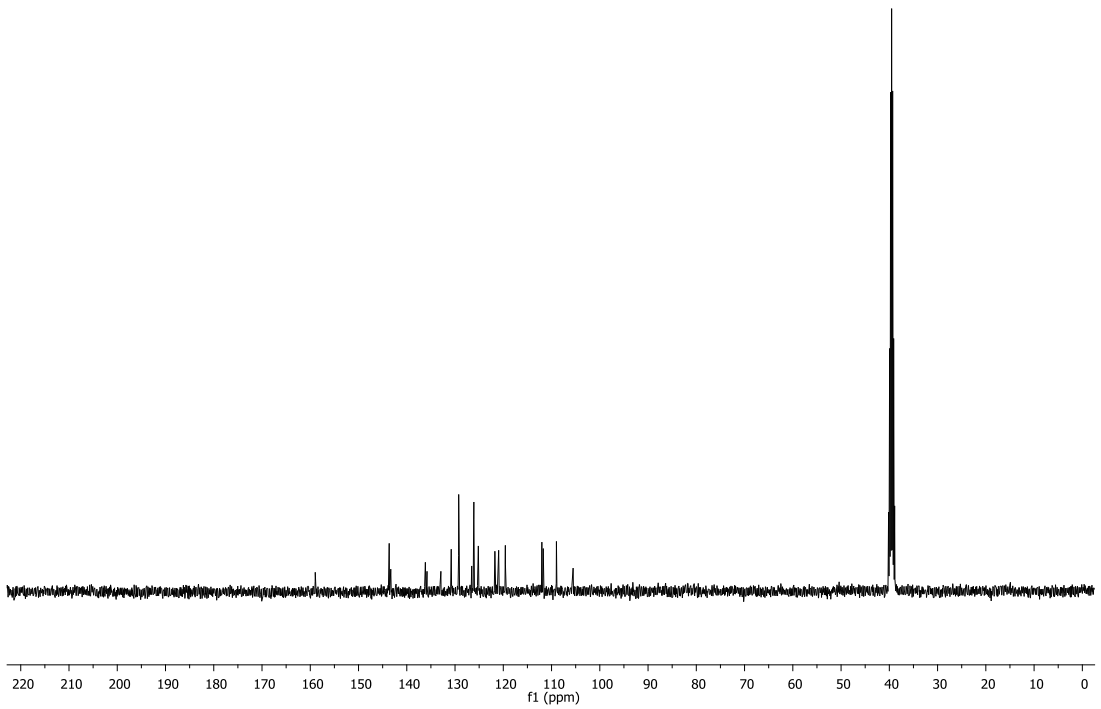

Compound 3ea

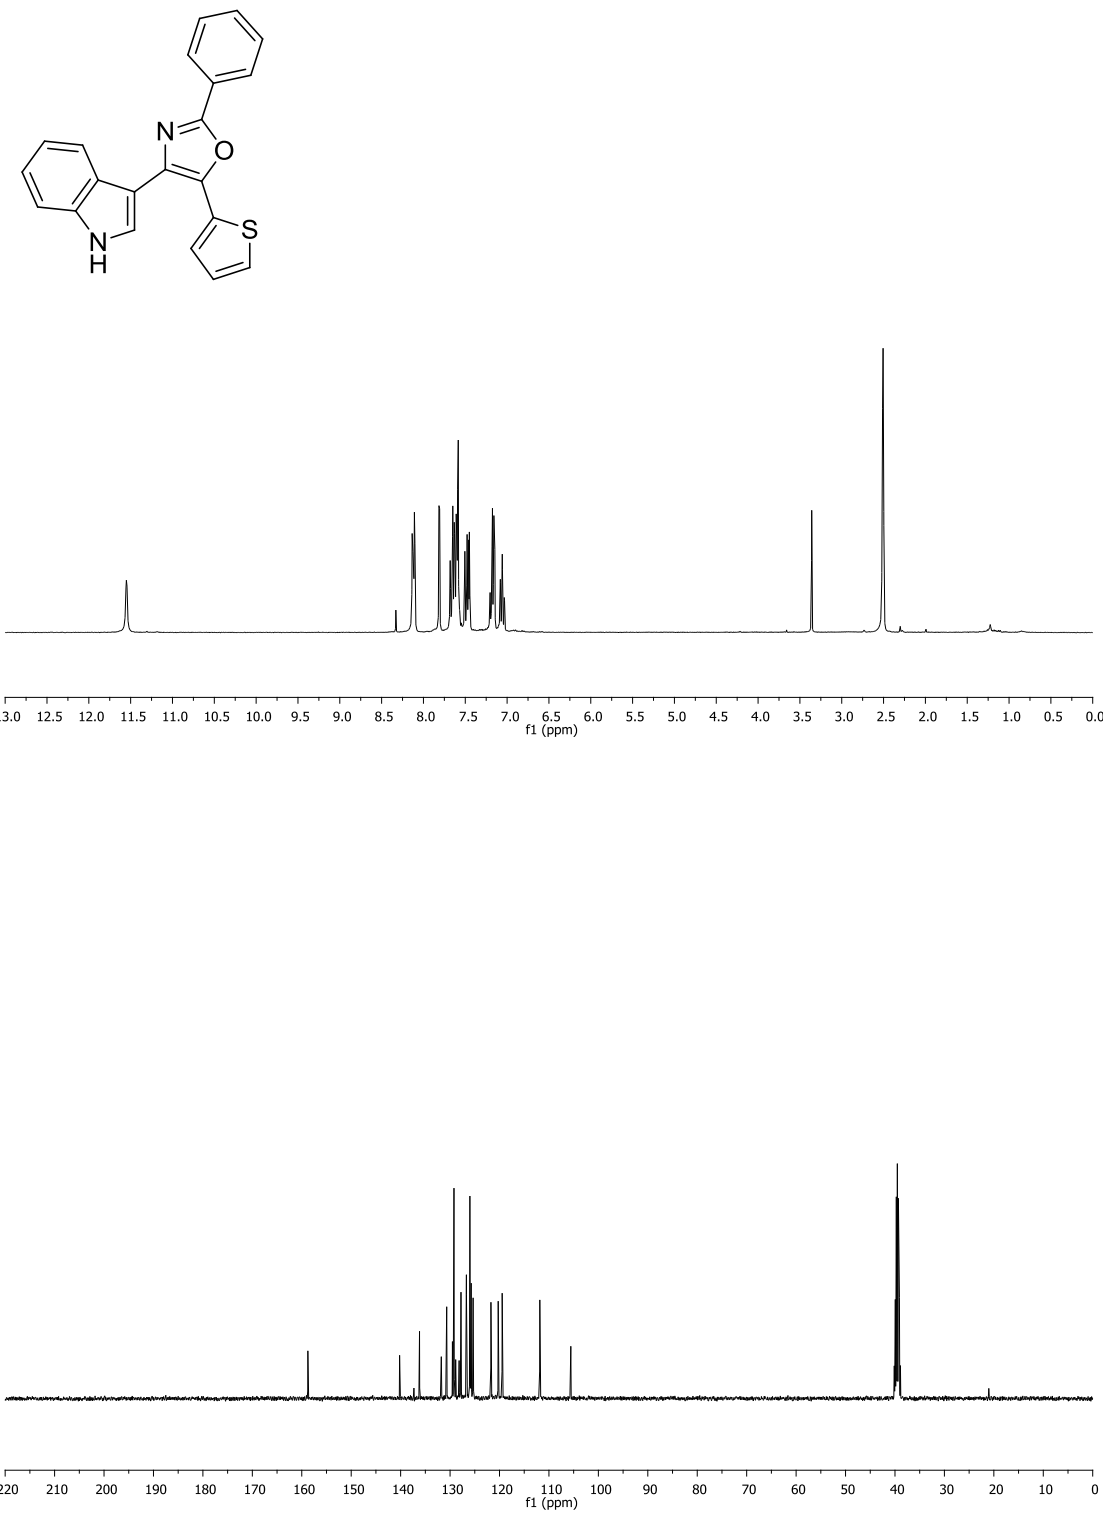

Compound 3fa

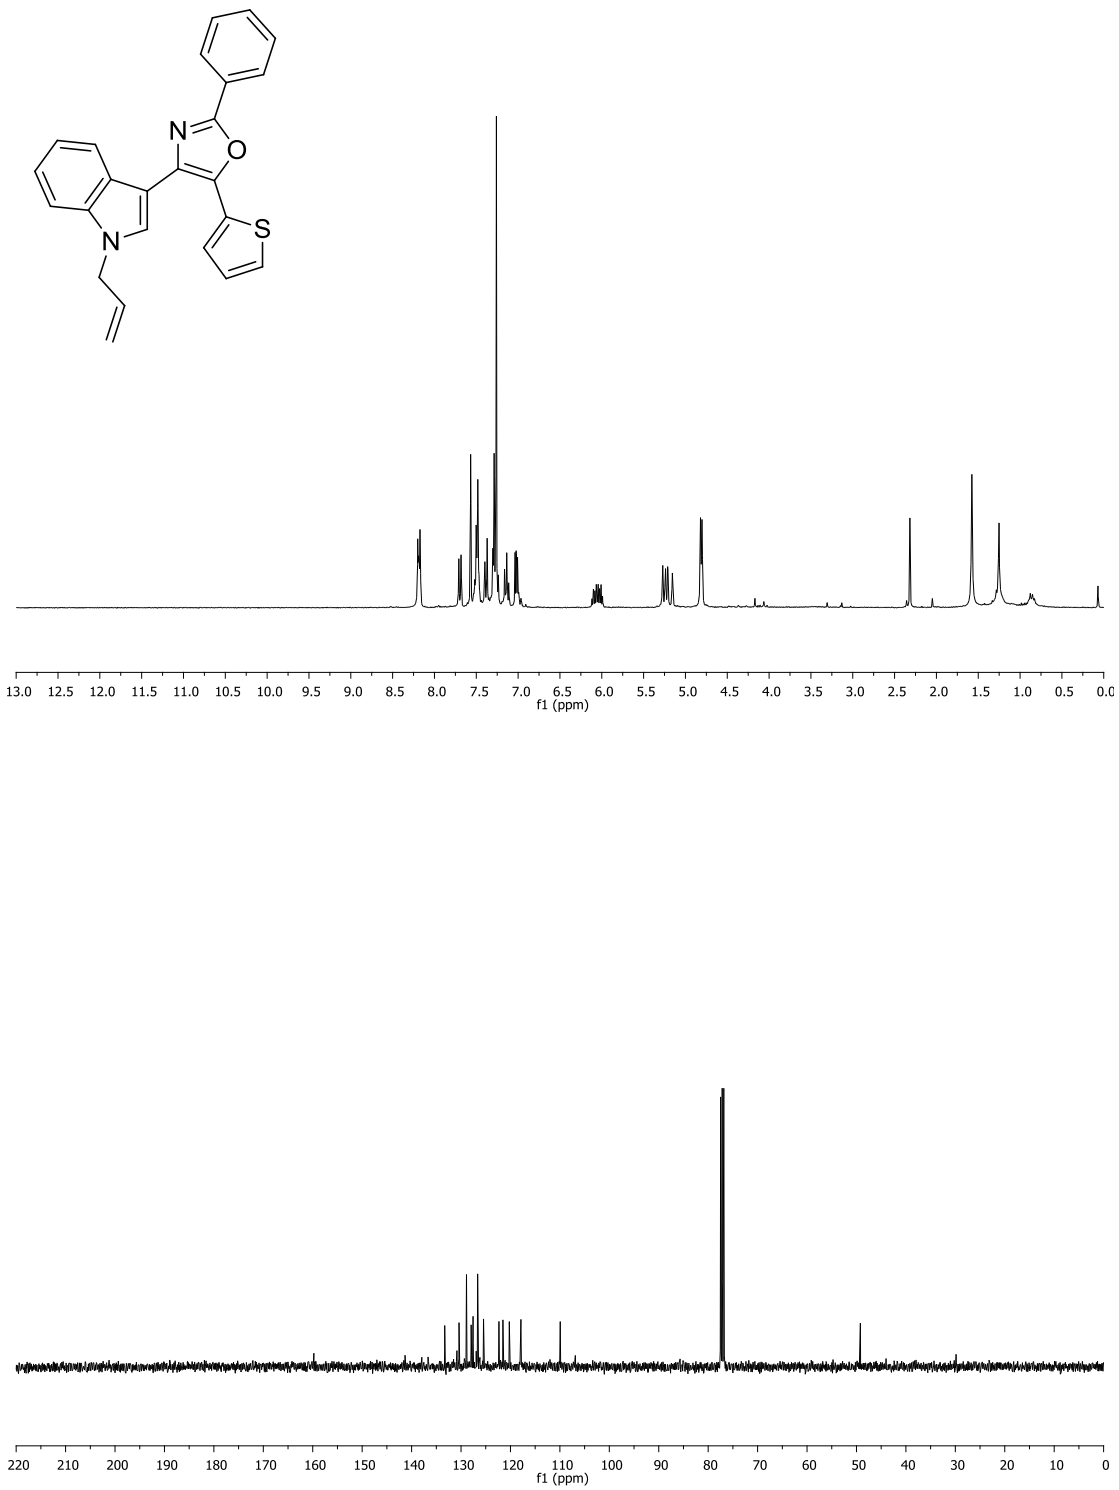

Compound 3ga

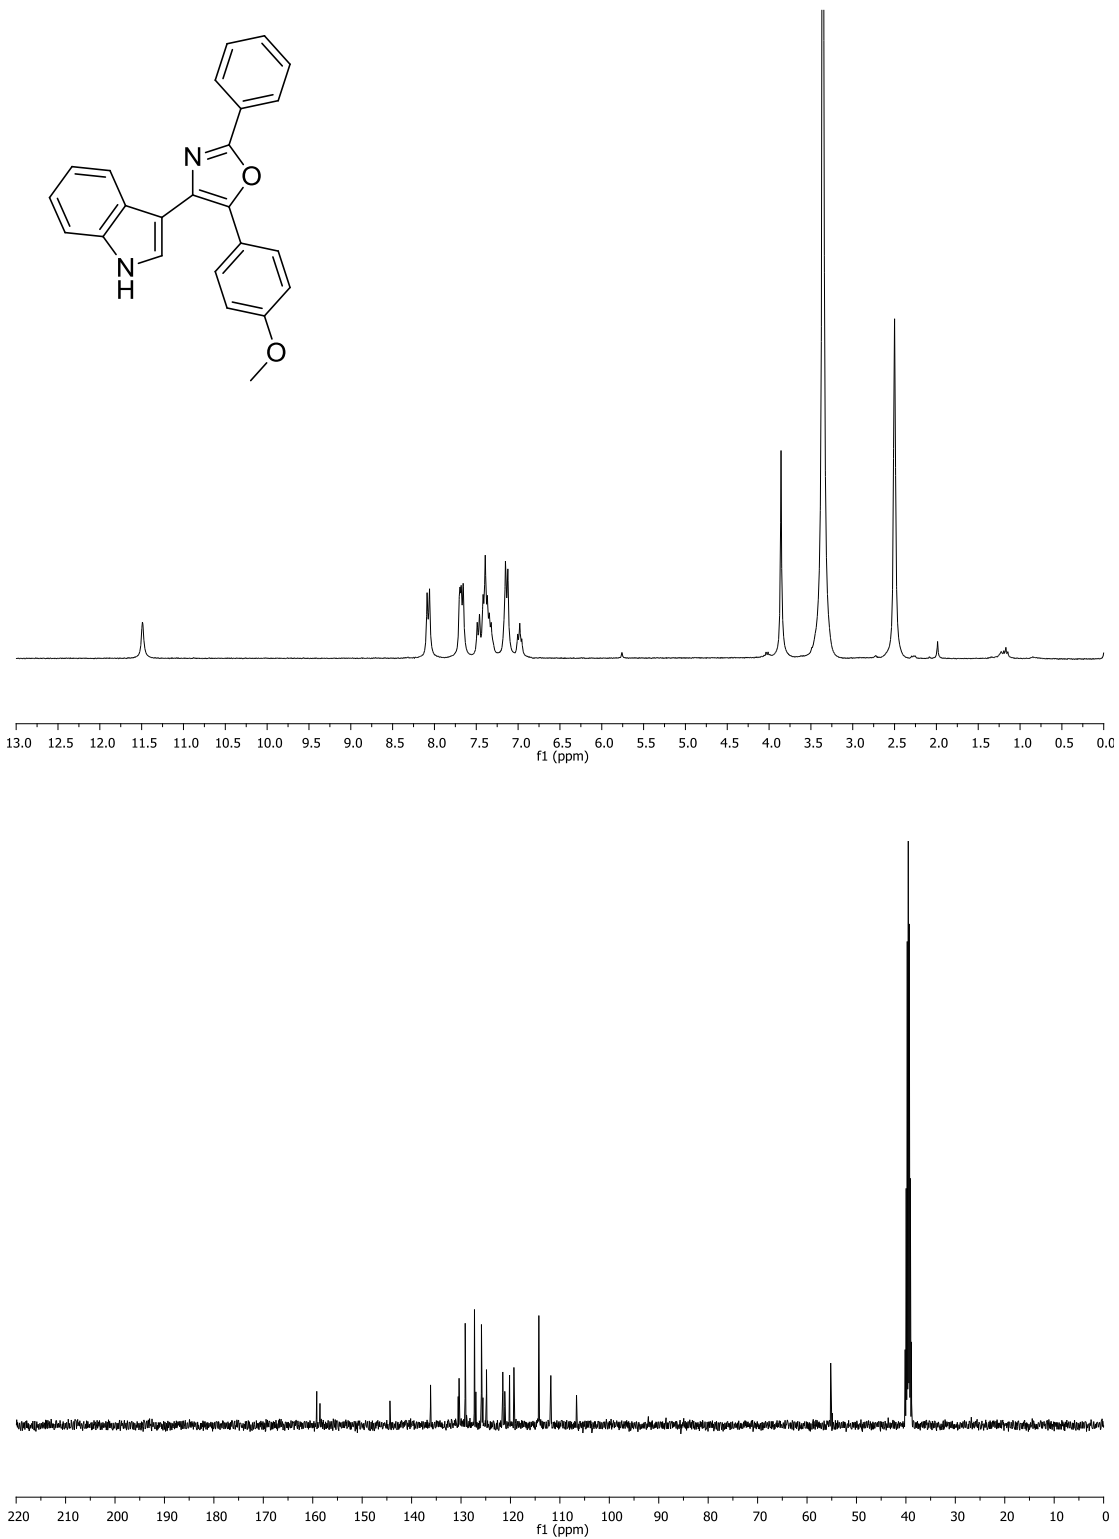

Compound 3ha

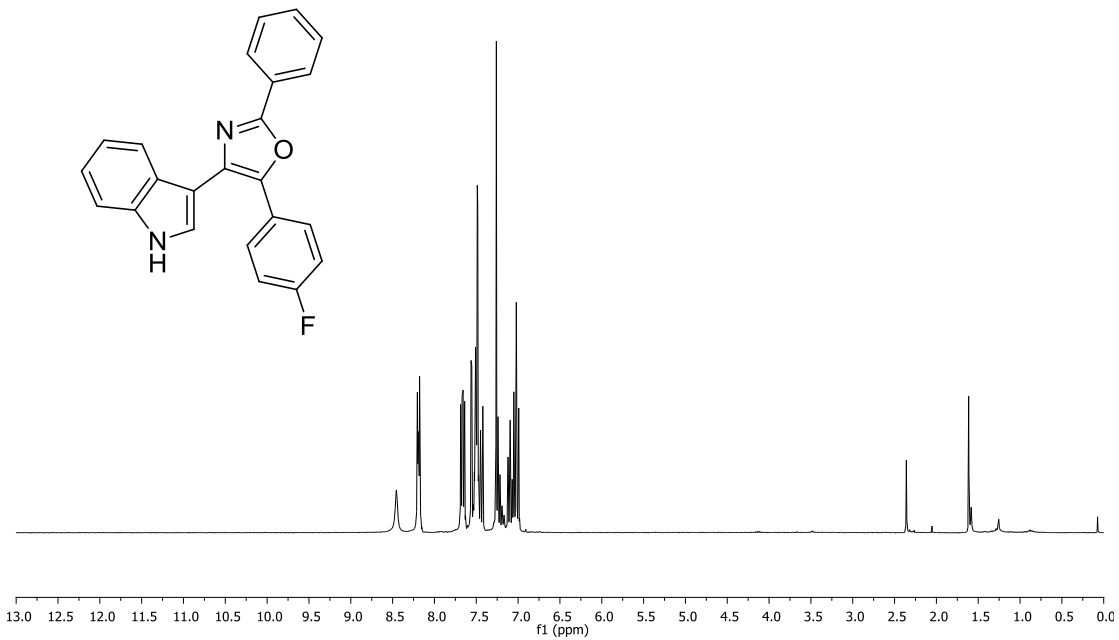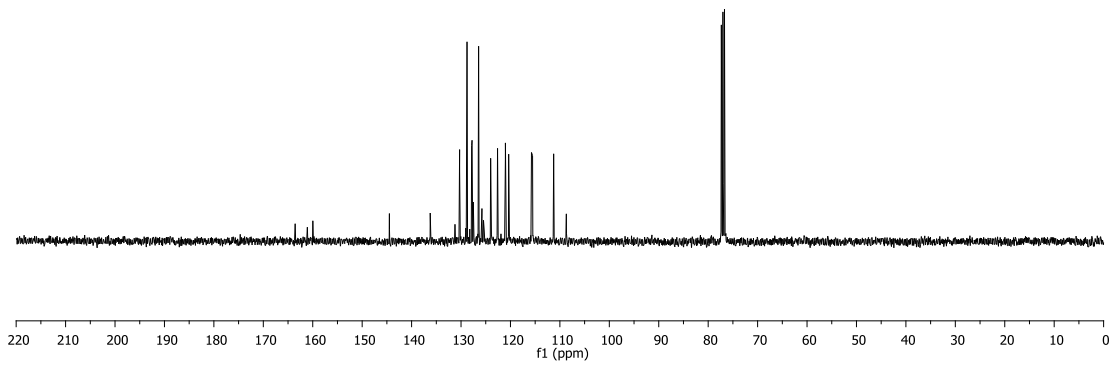

Compound 3ia

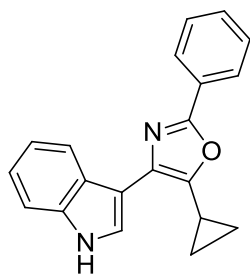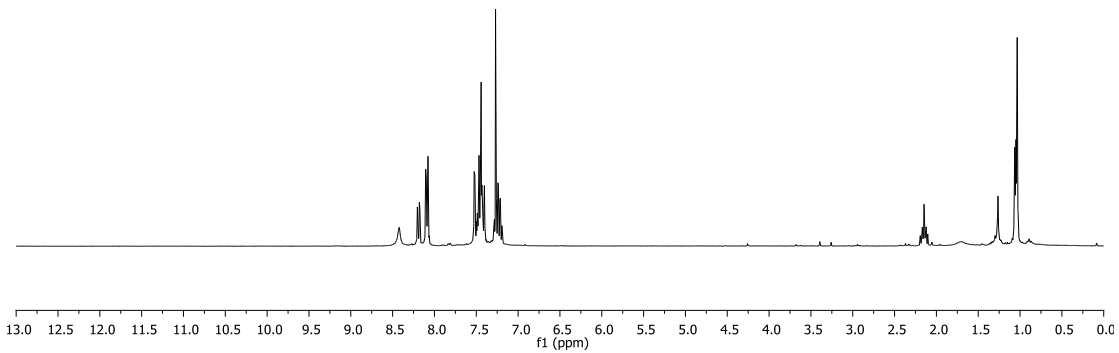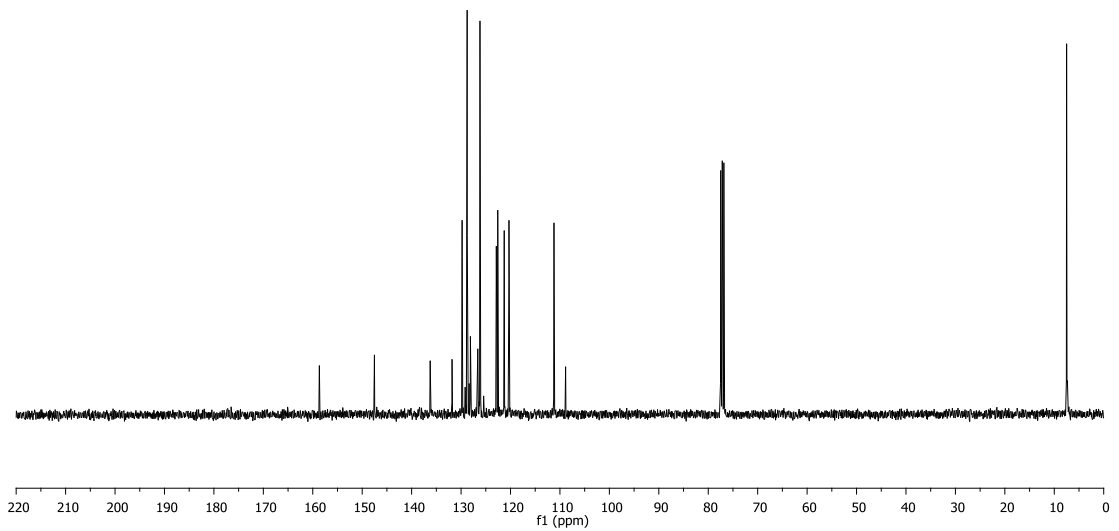



Compound 3ja

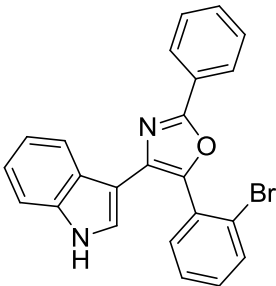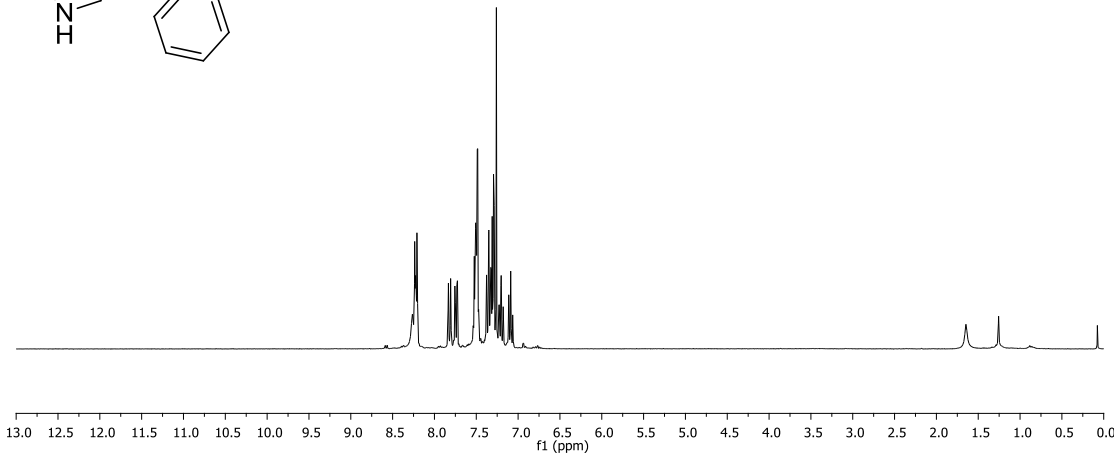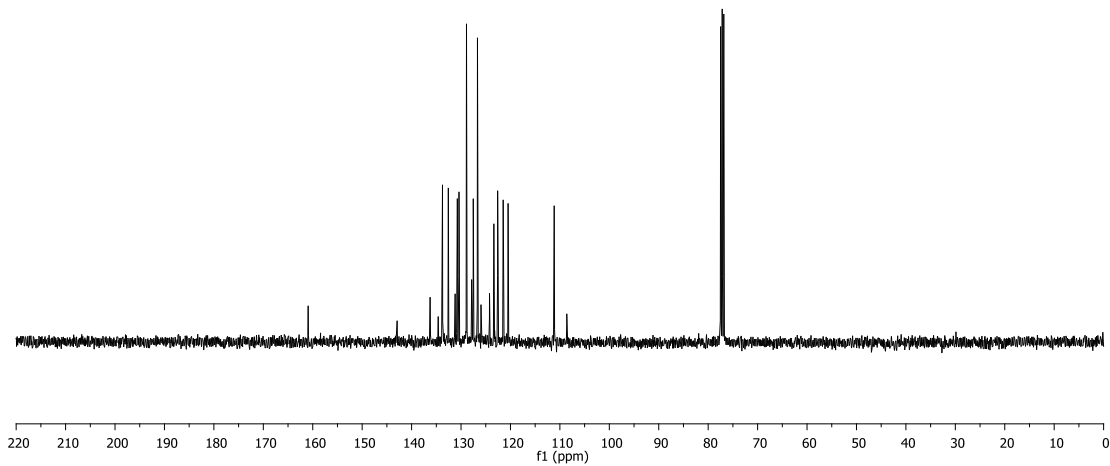

Compound 3ab

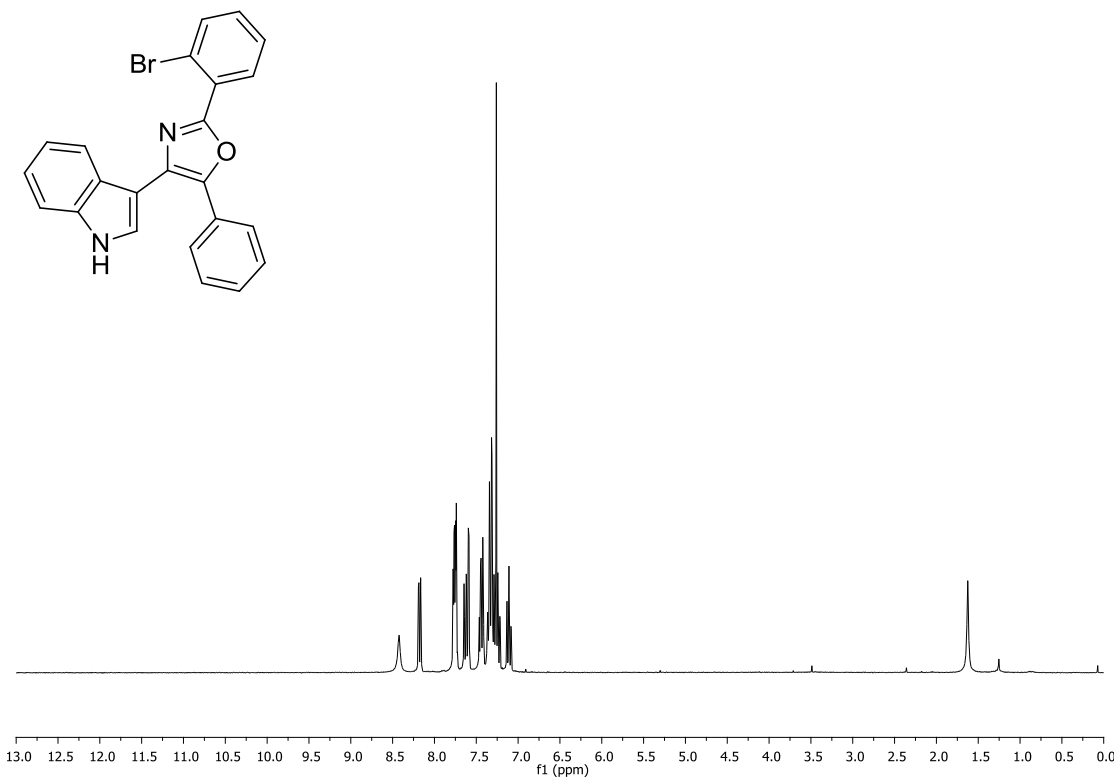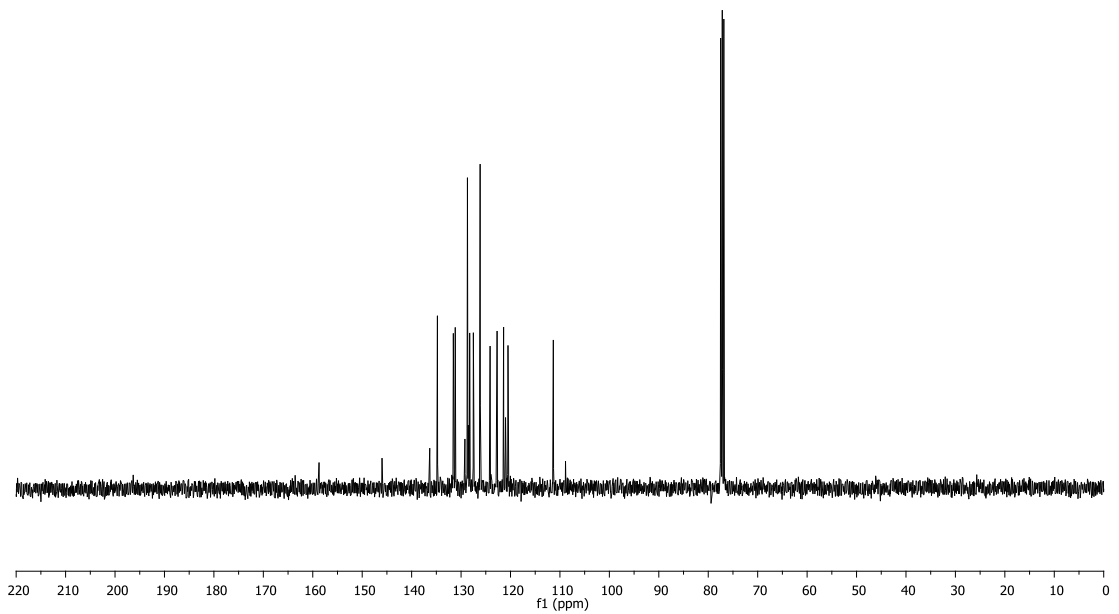

Compound 3hb

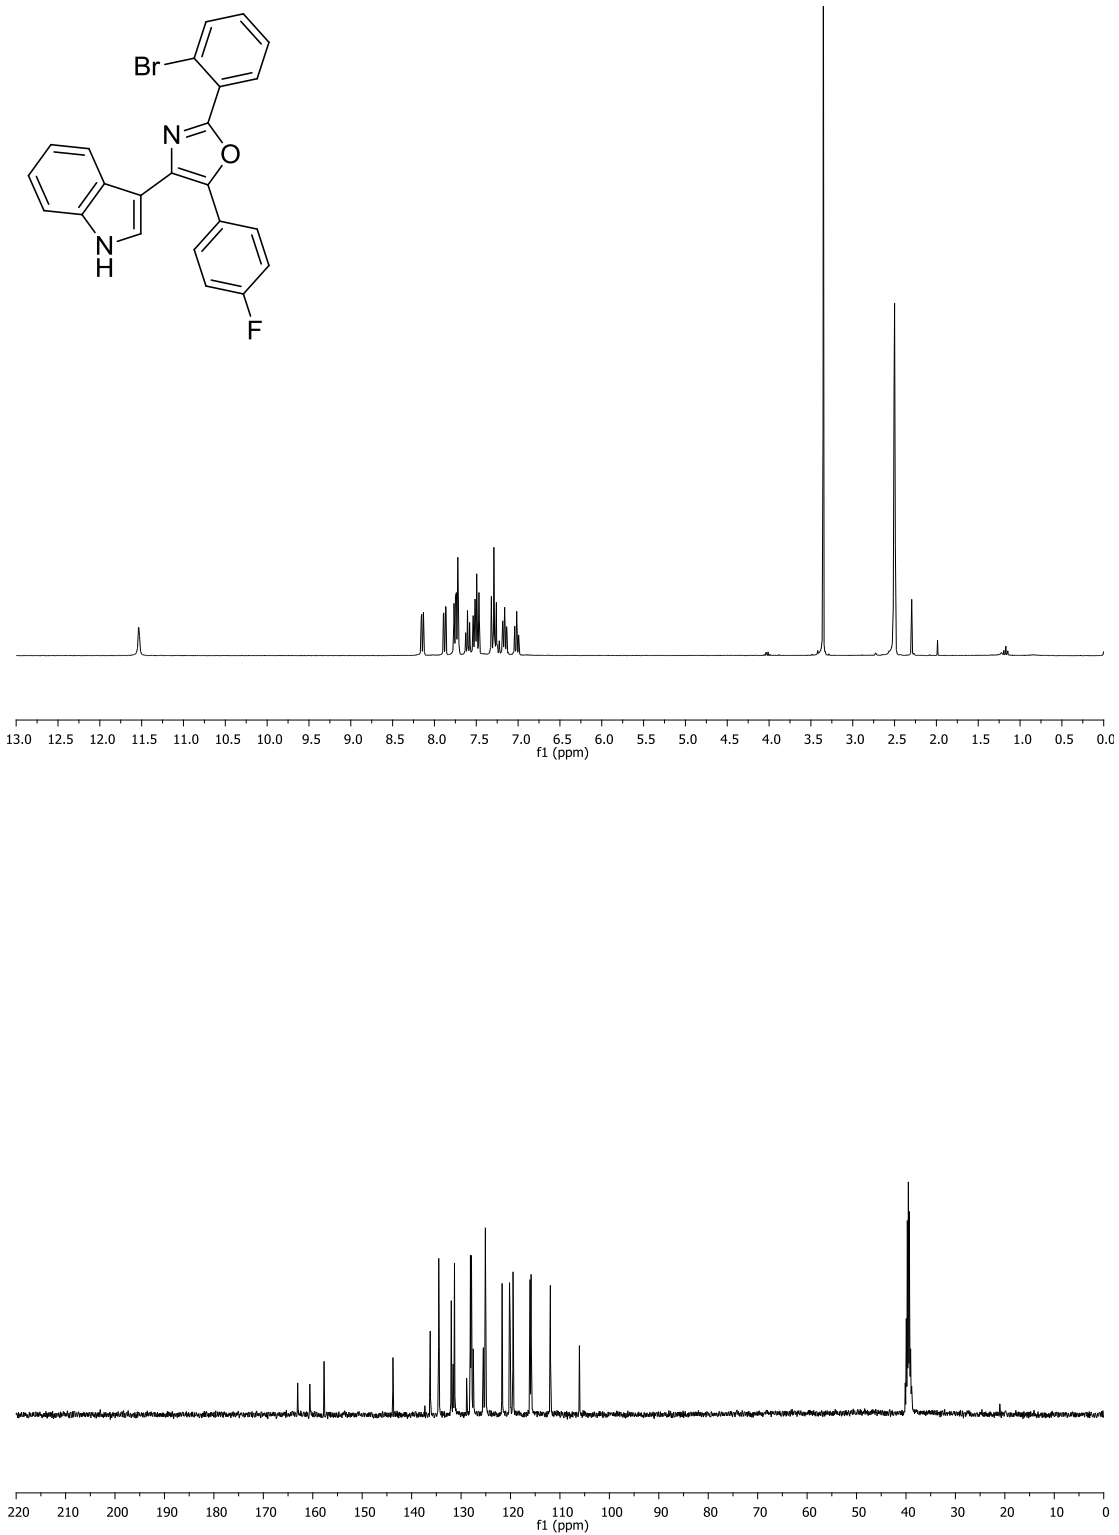

Compound 3ac

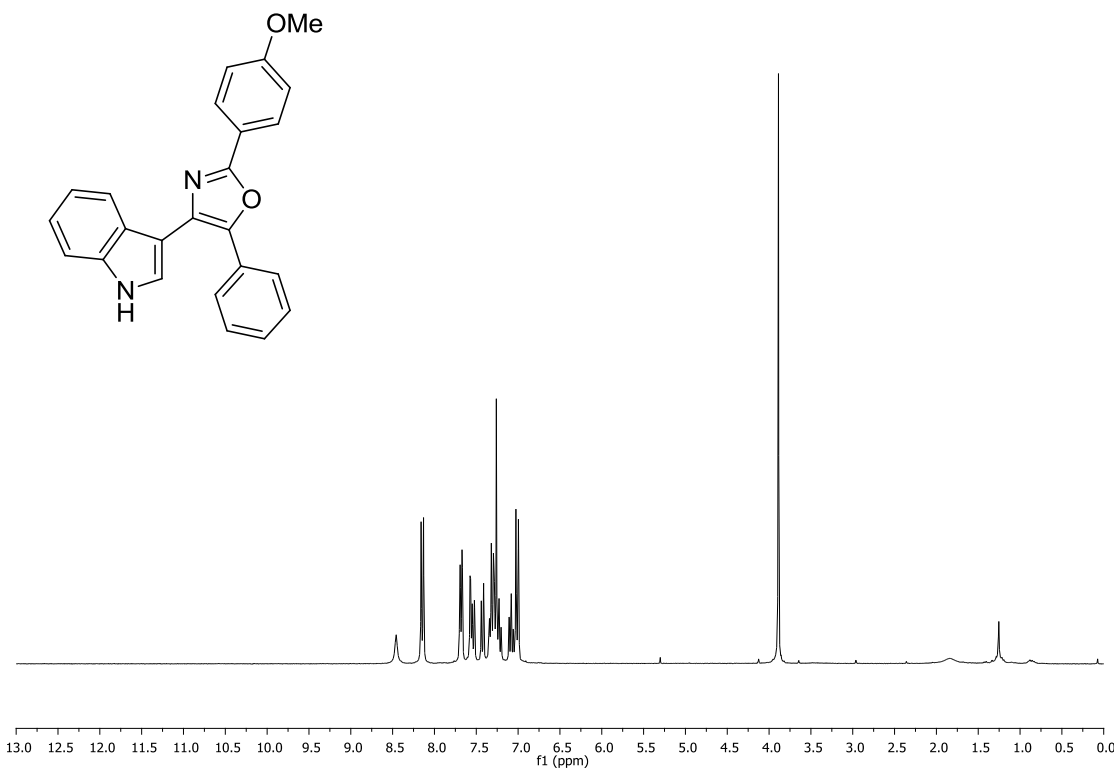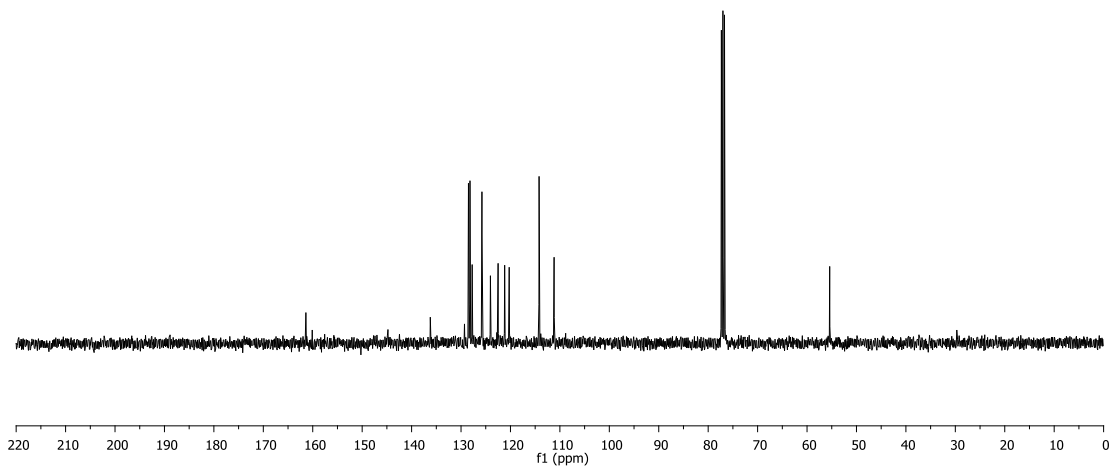

Compound 3ad

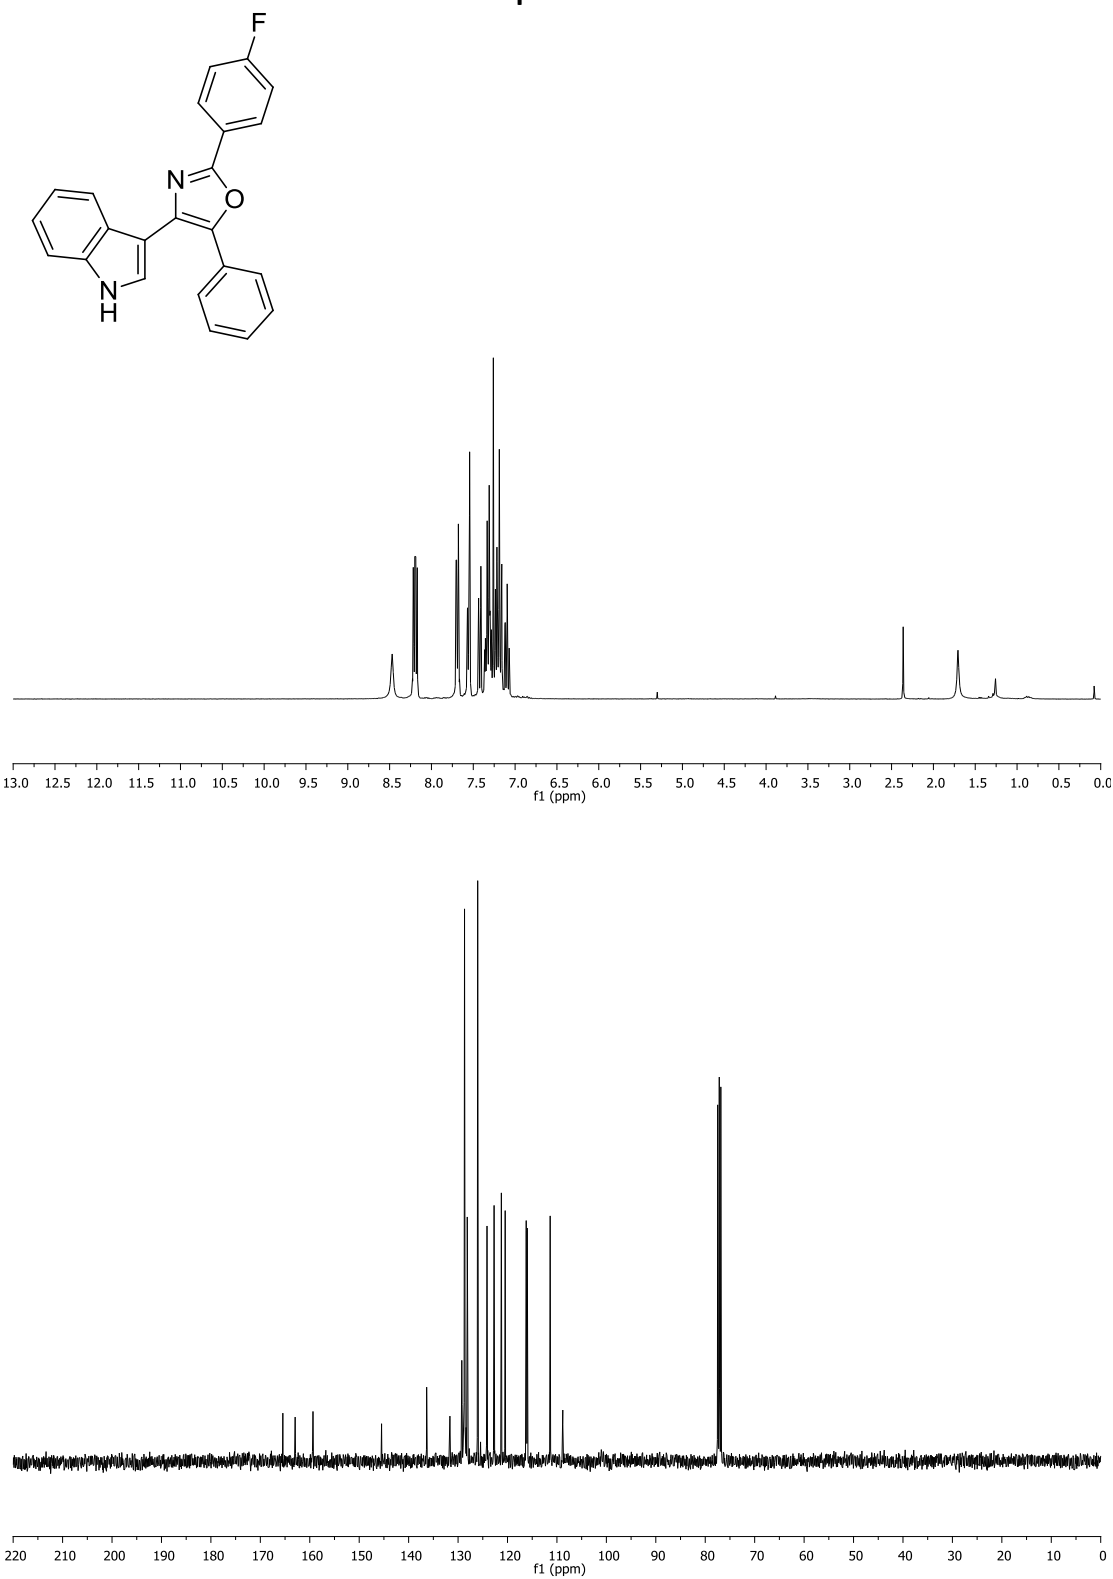

Compound 3hd

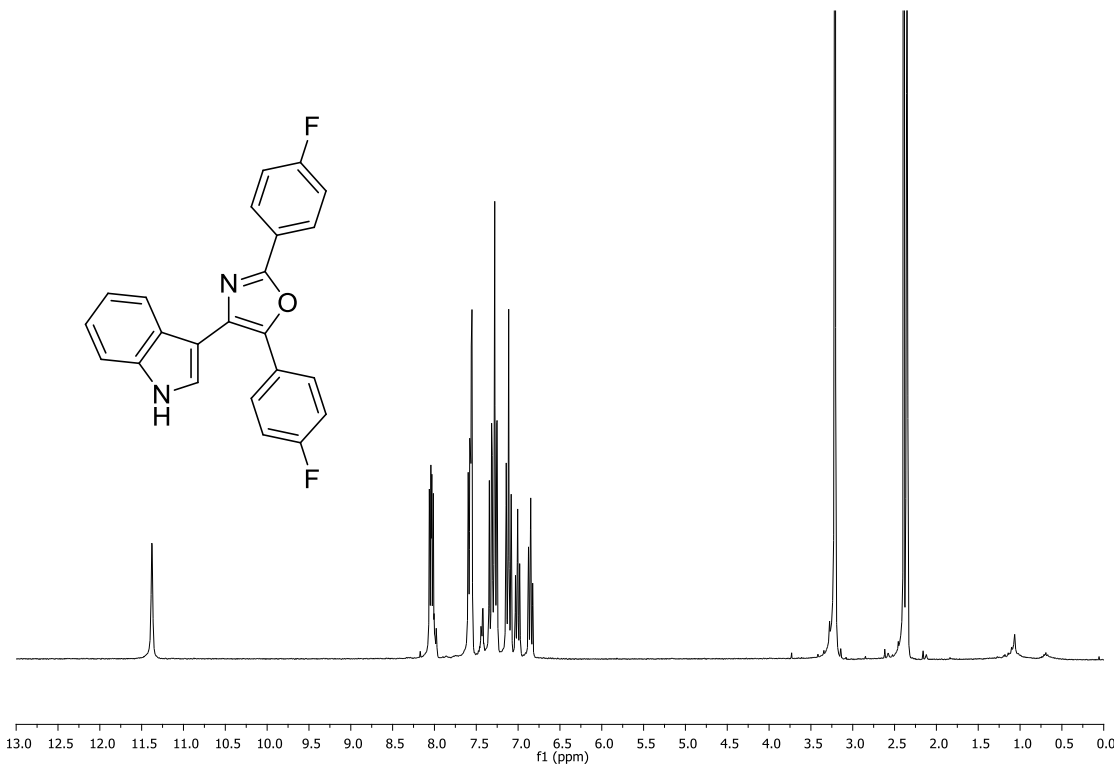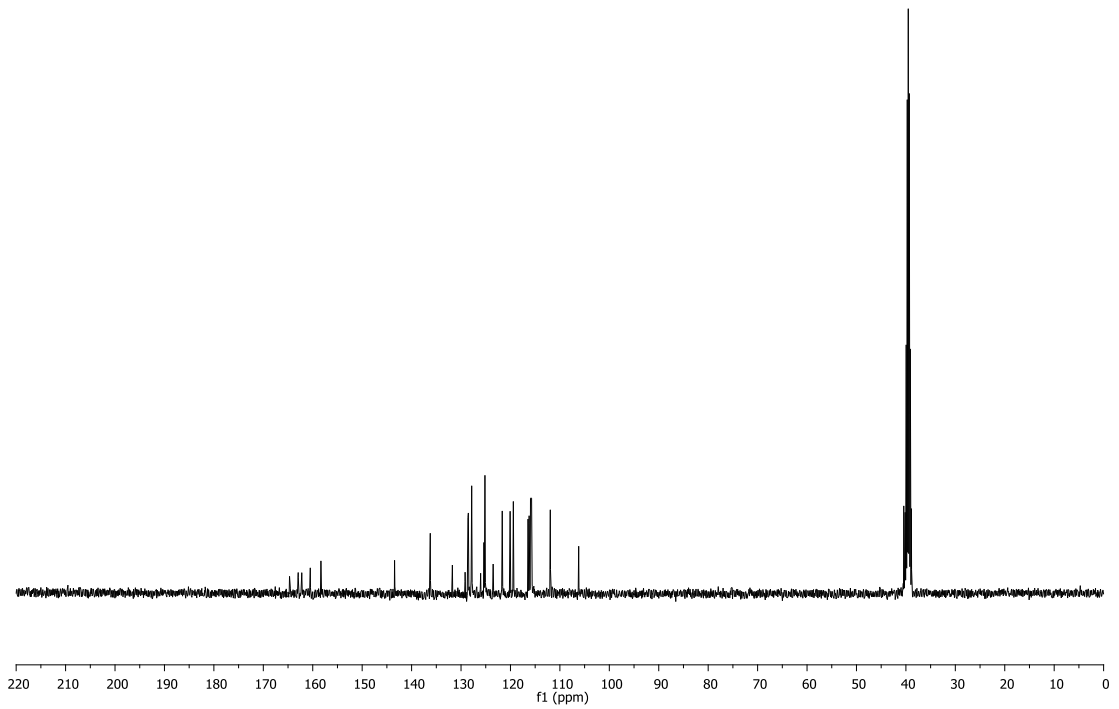

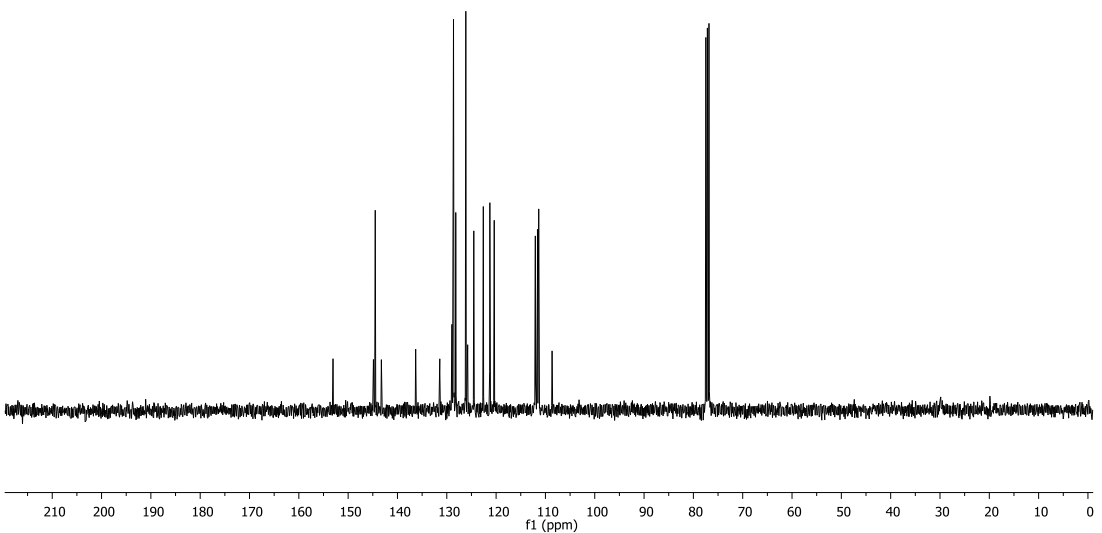

Compound 3ce

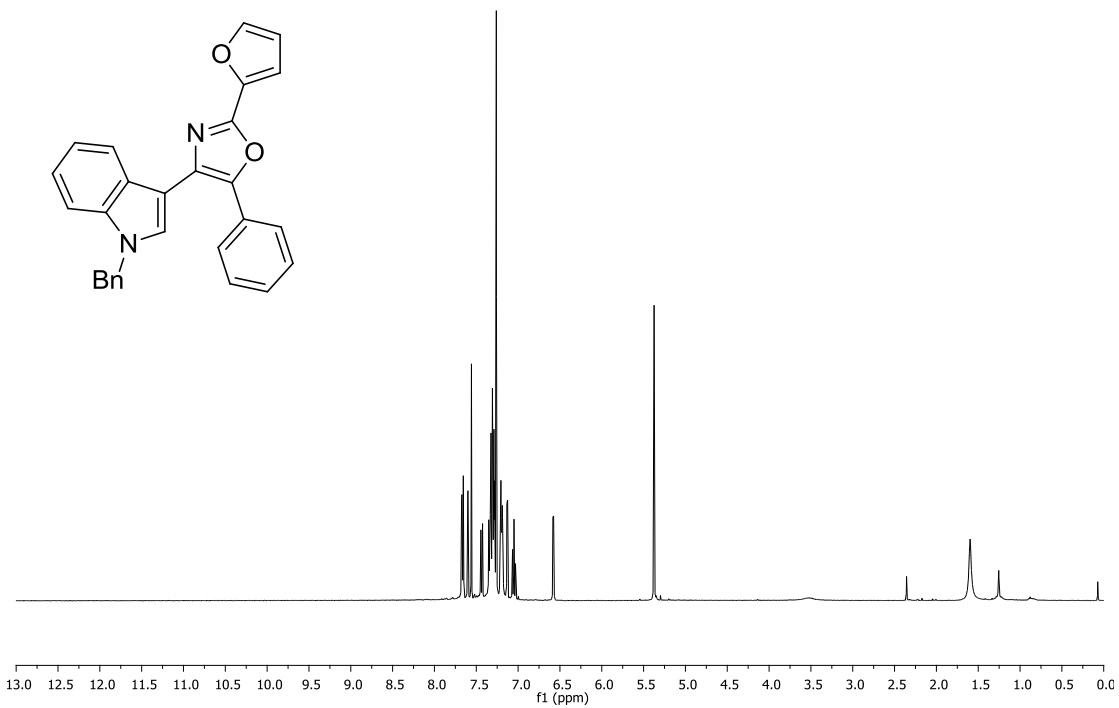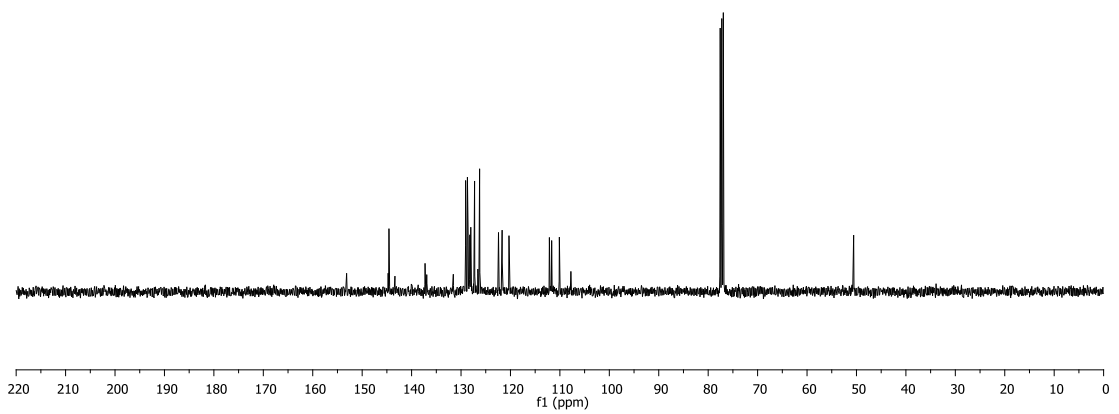



Compound 3af

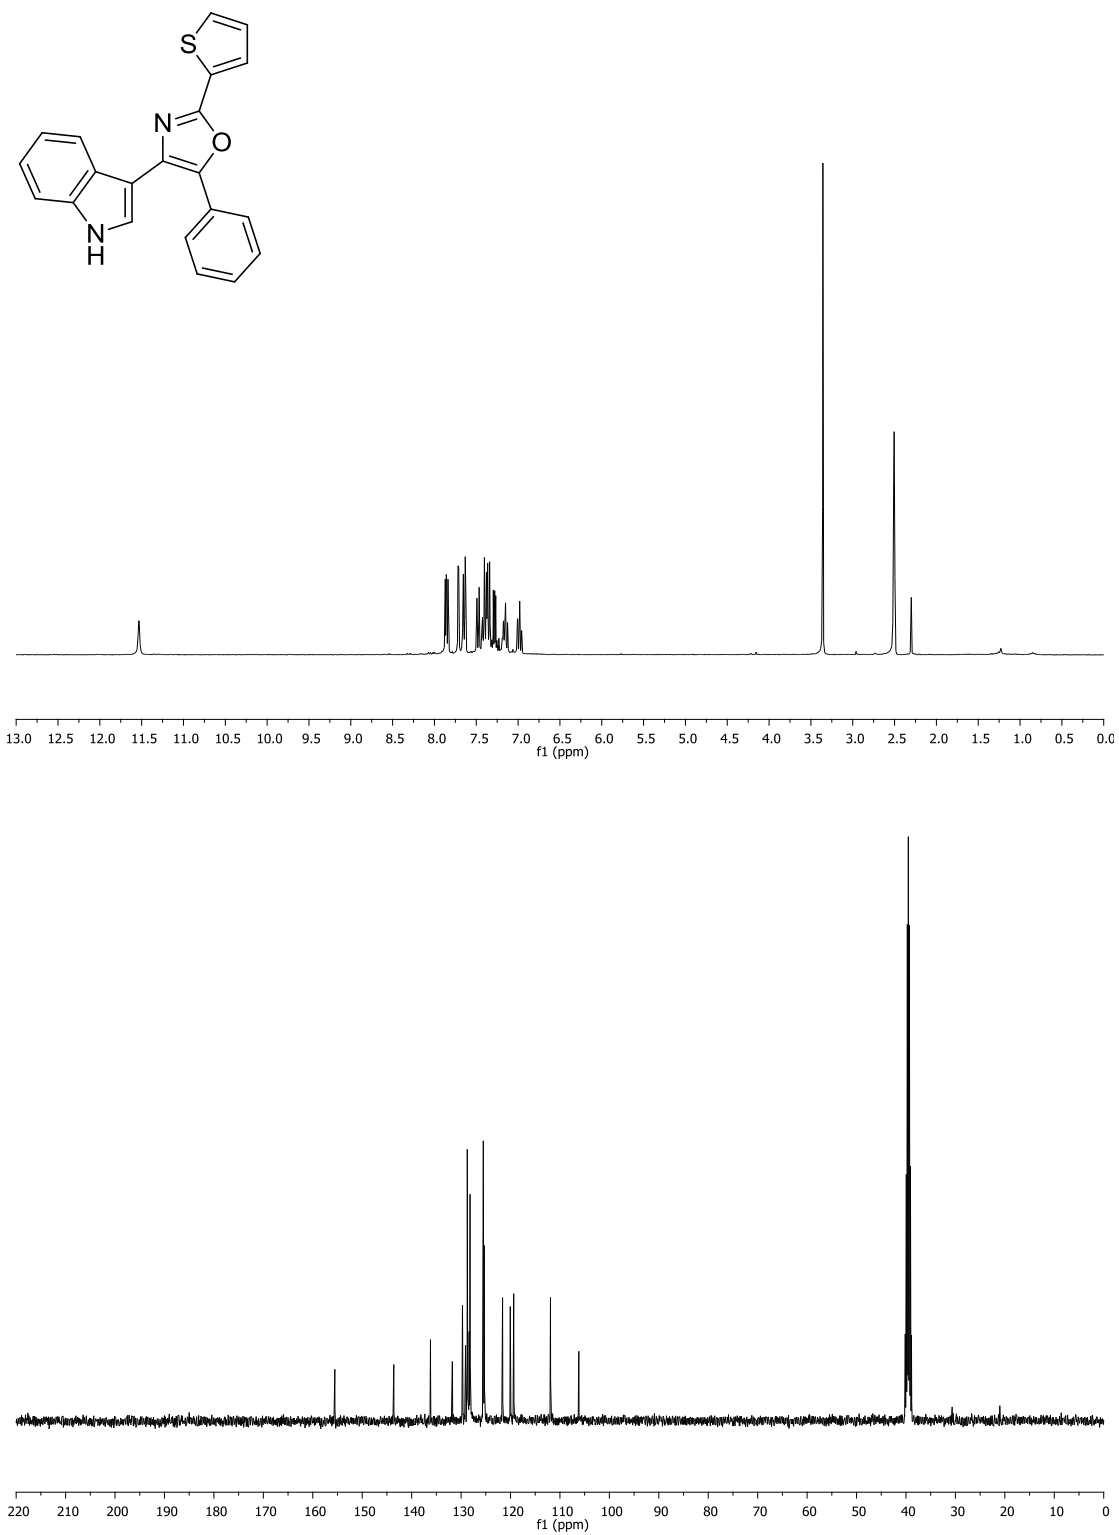

Compound 3ge

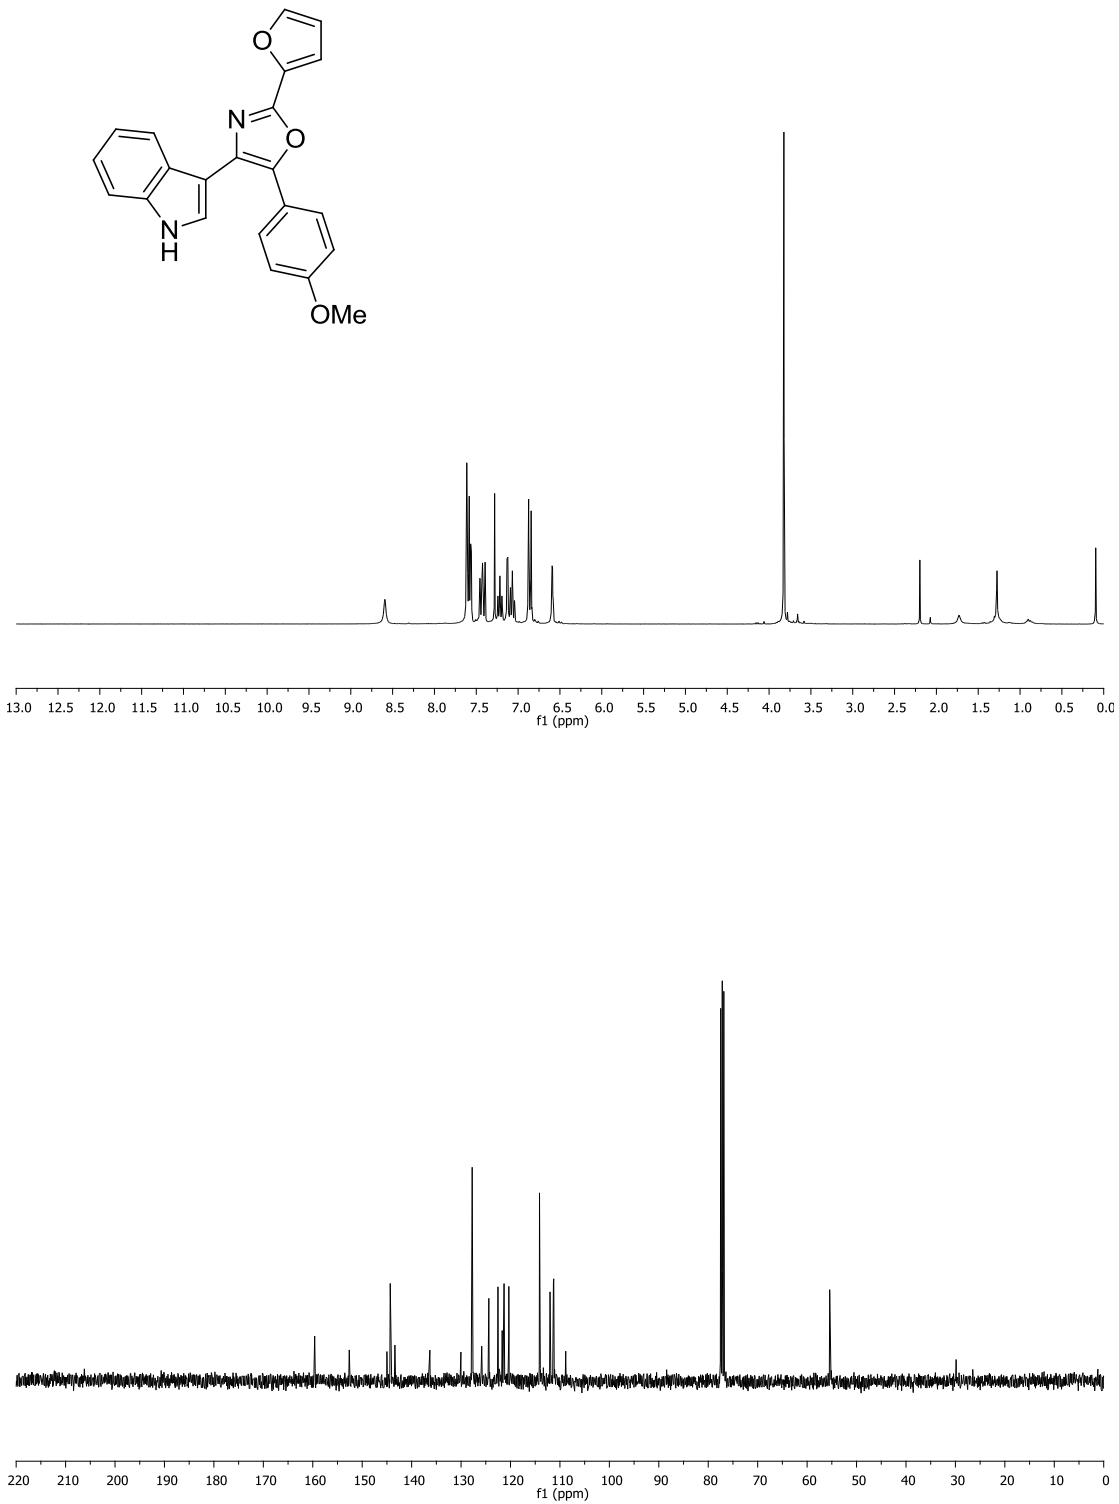

Compound 3ka

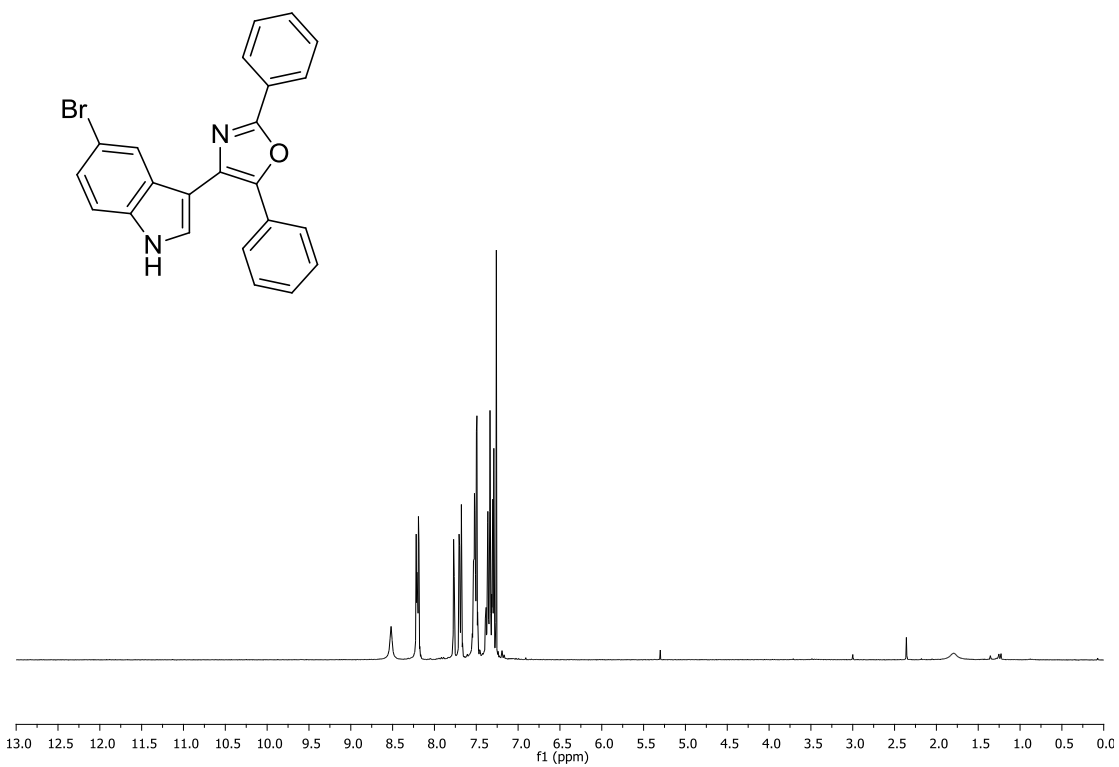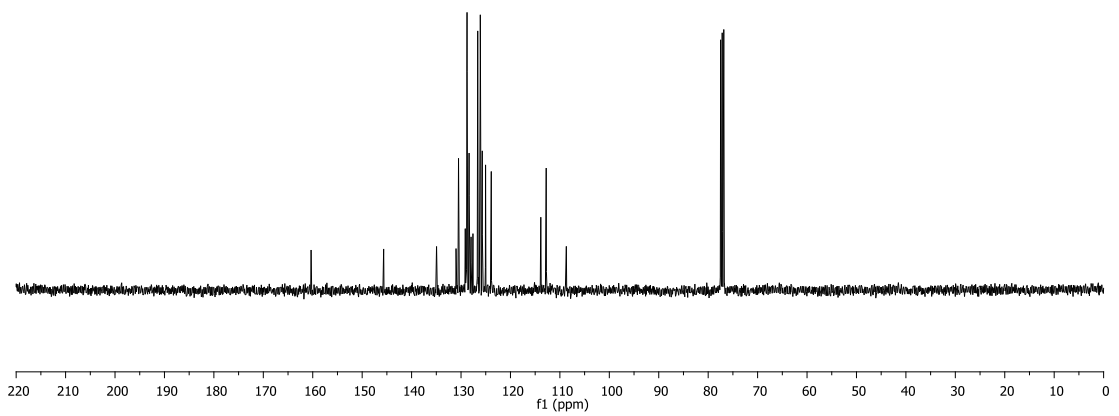

Compound 3kf

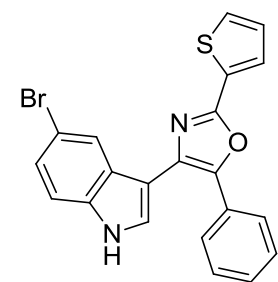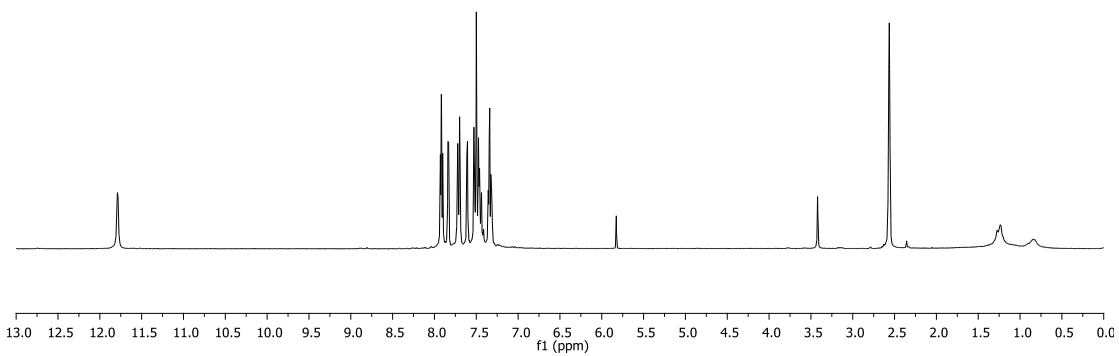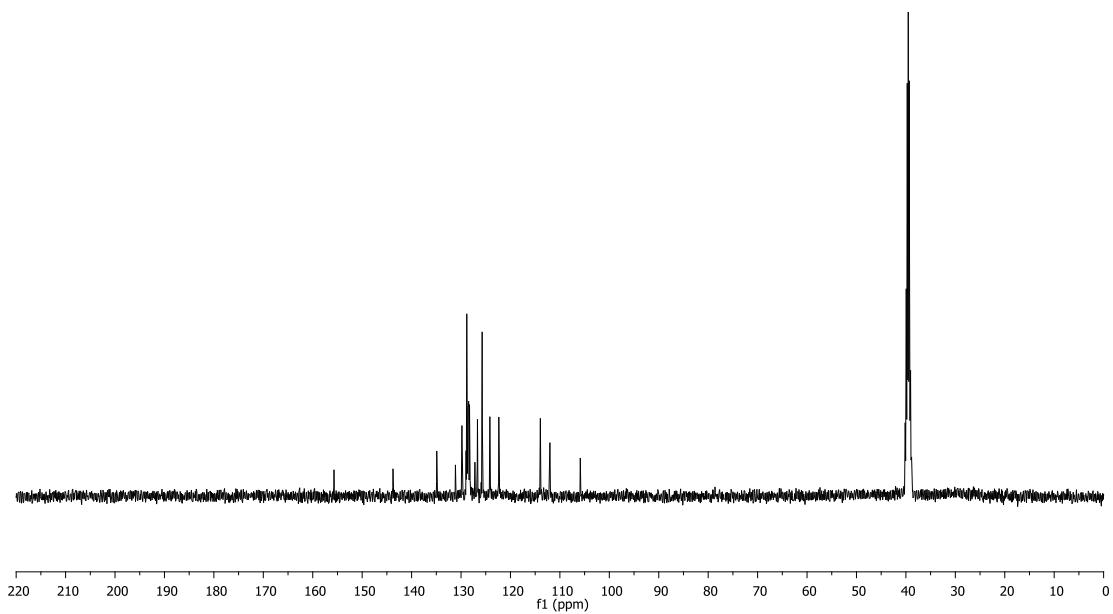

Compound 3fe

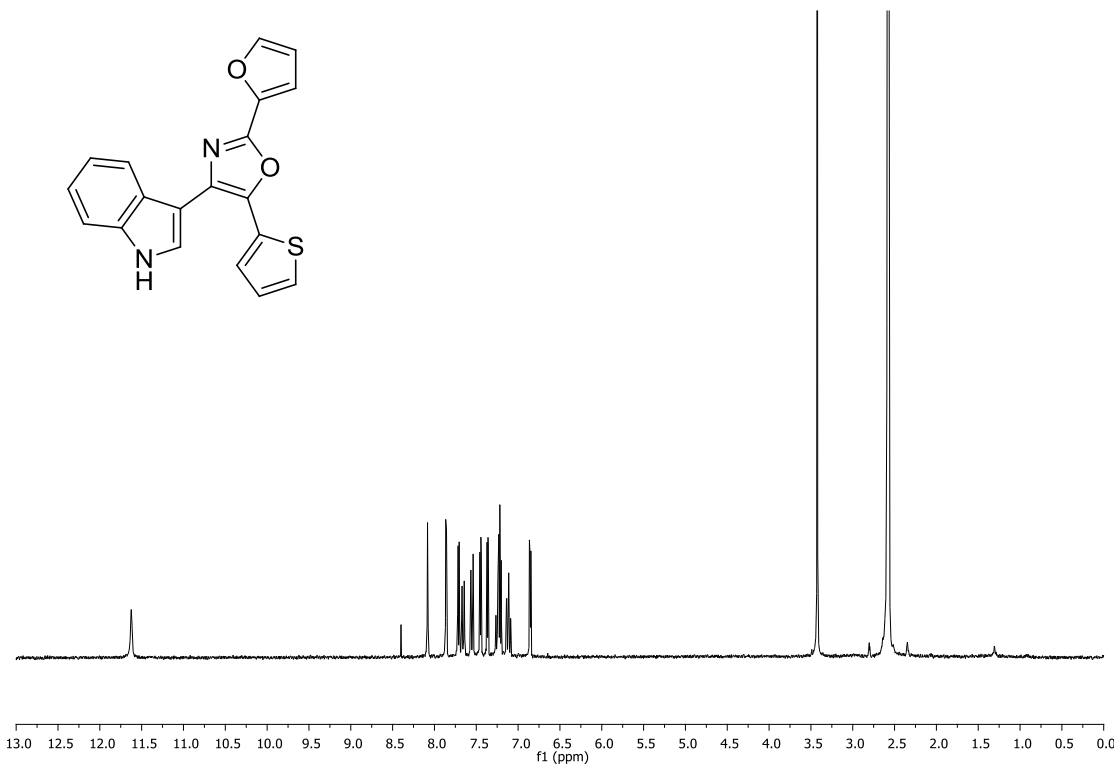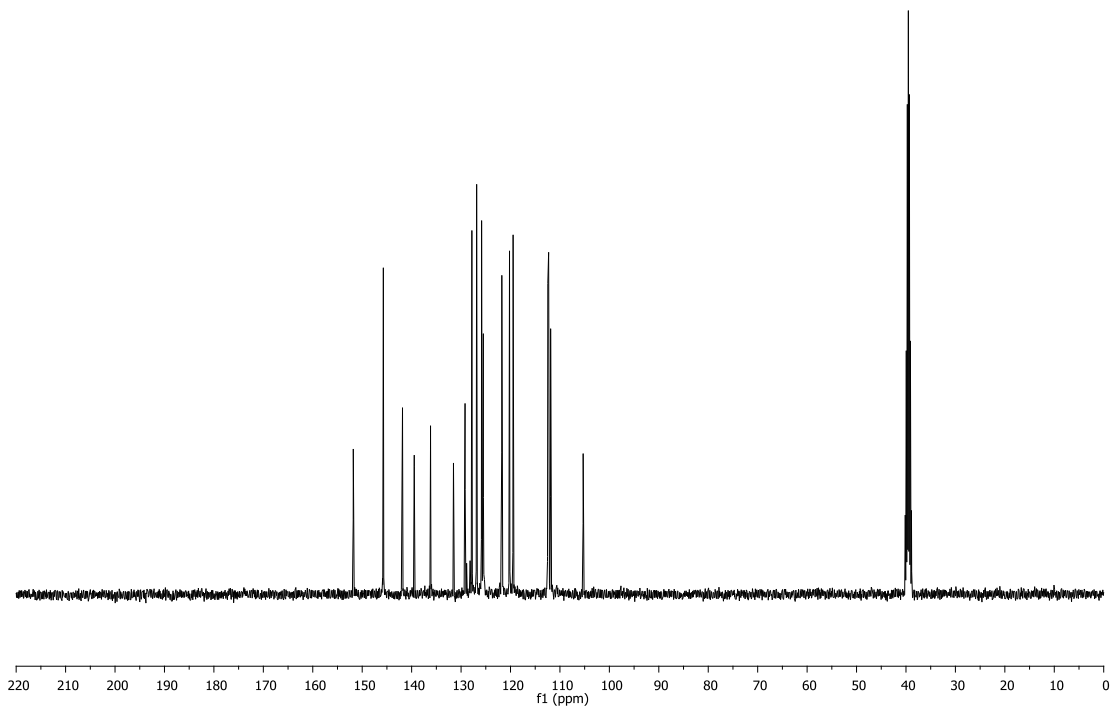

Compound 3ef

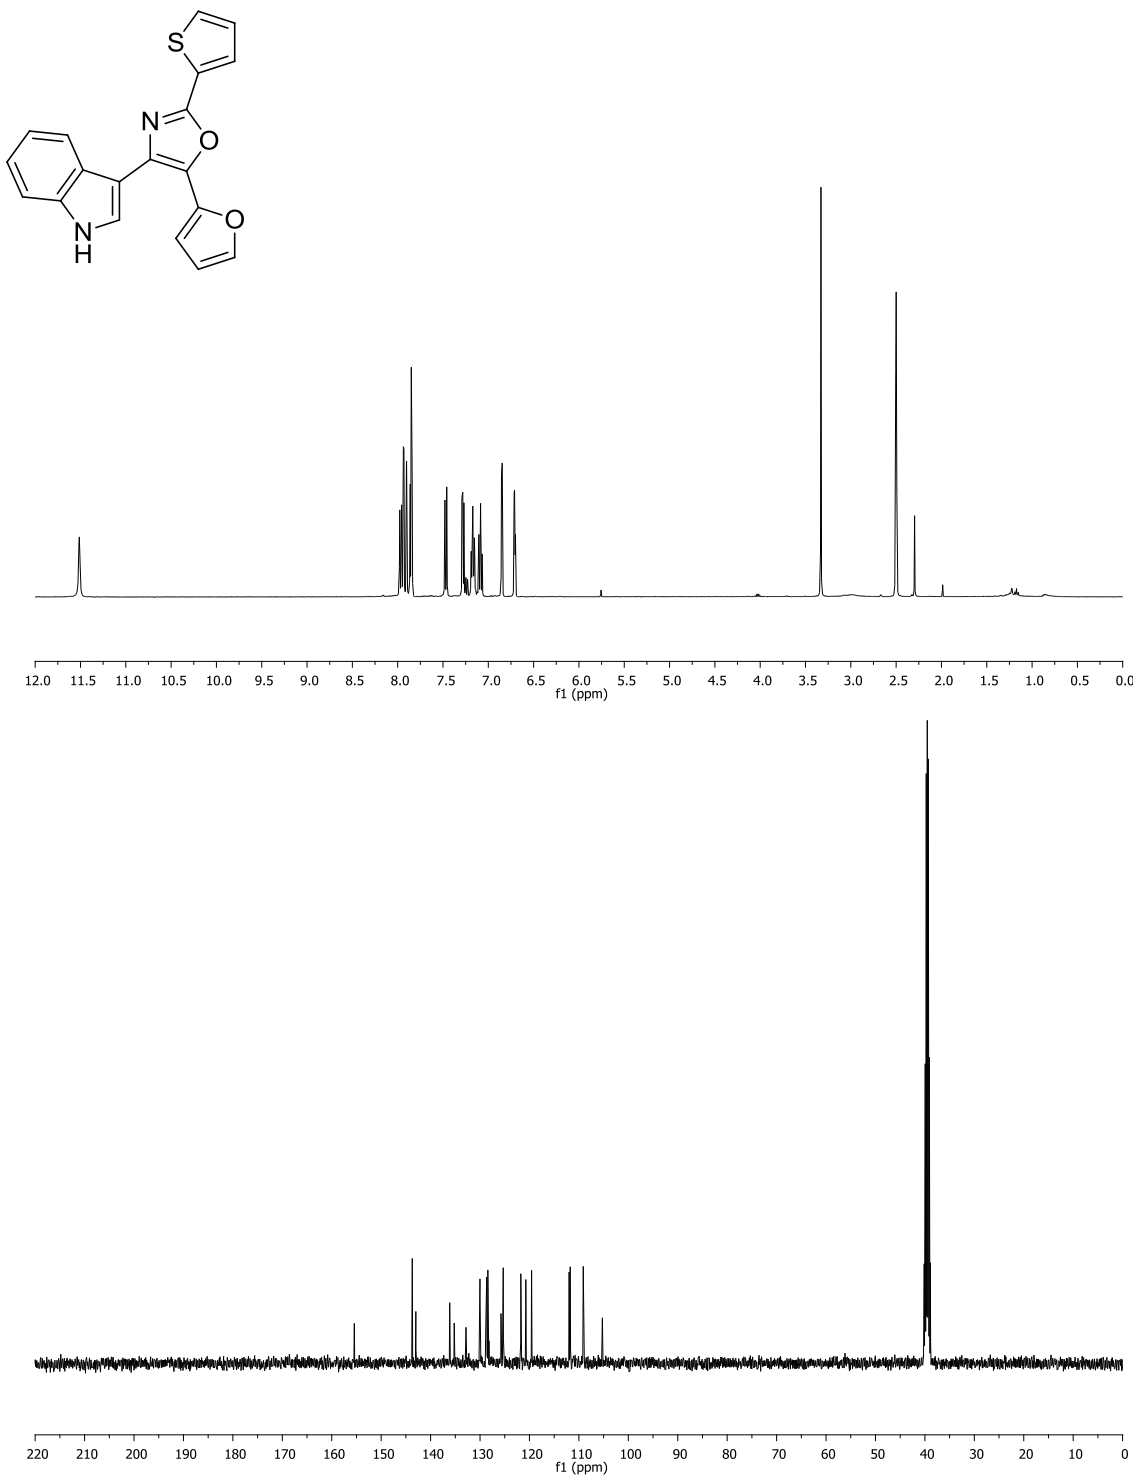

Compound 3la

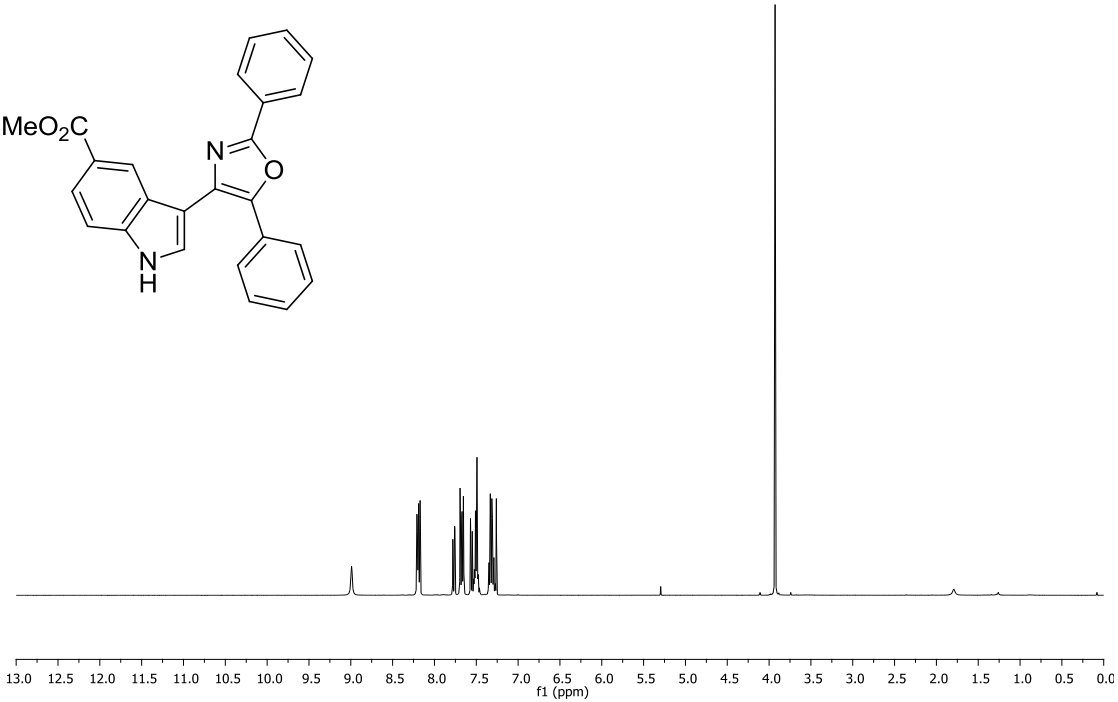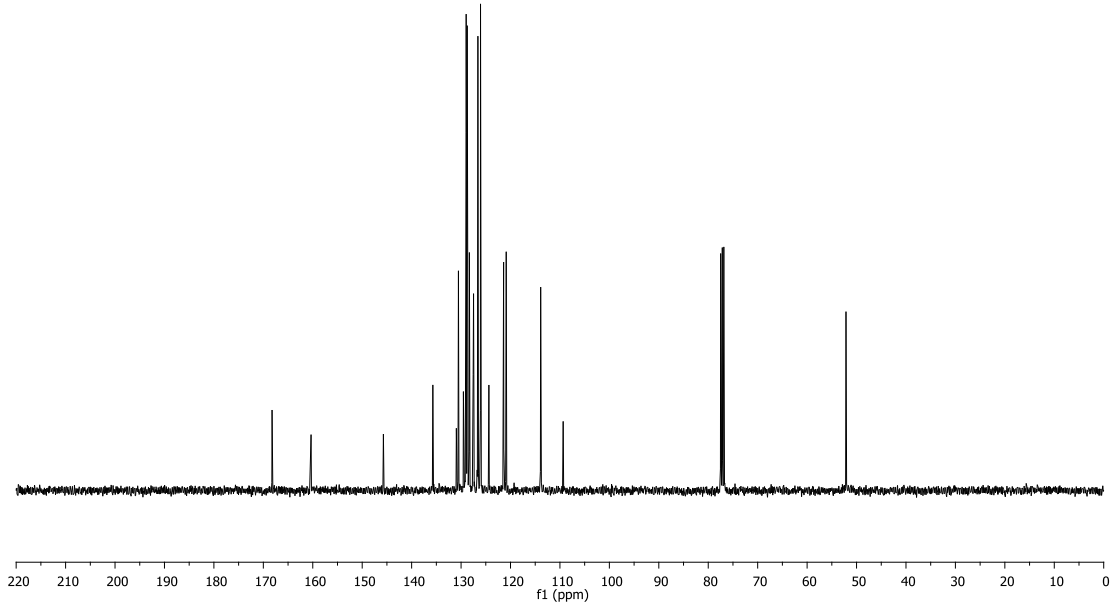

Compound 3le

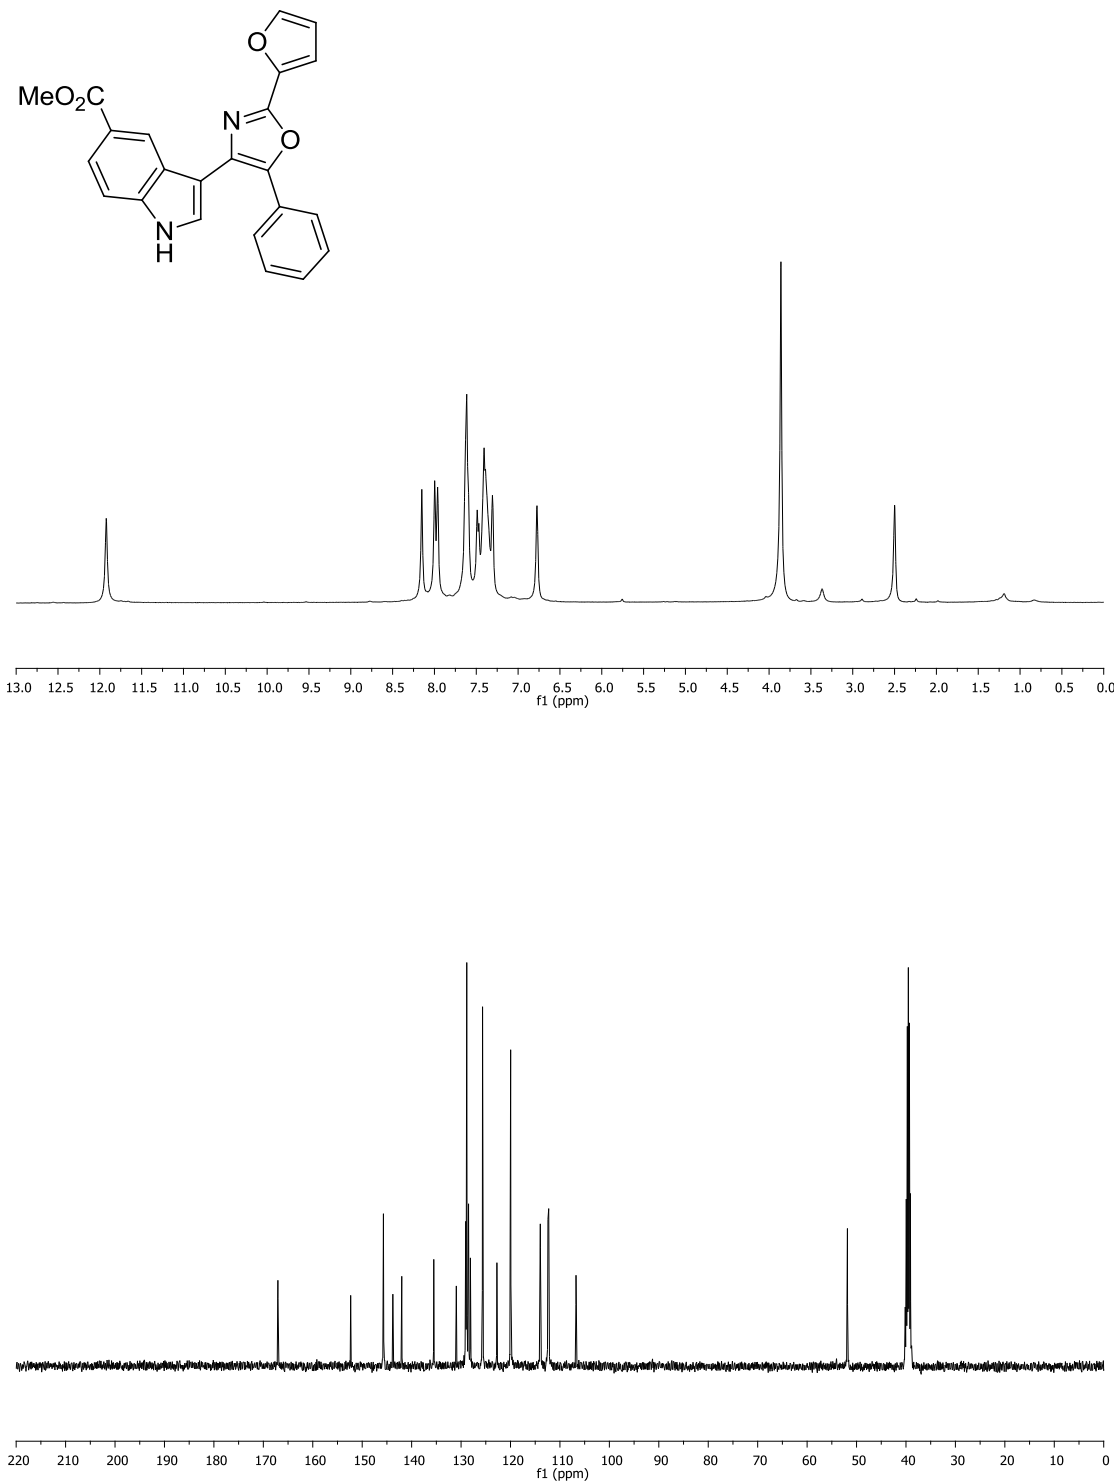



Compound 5aa

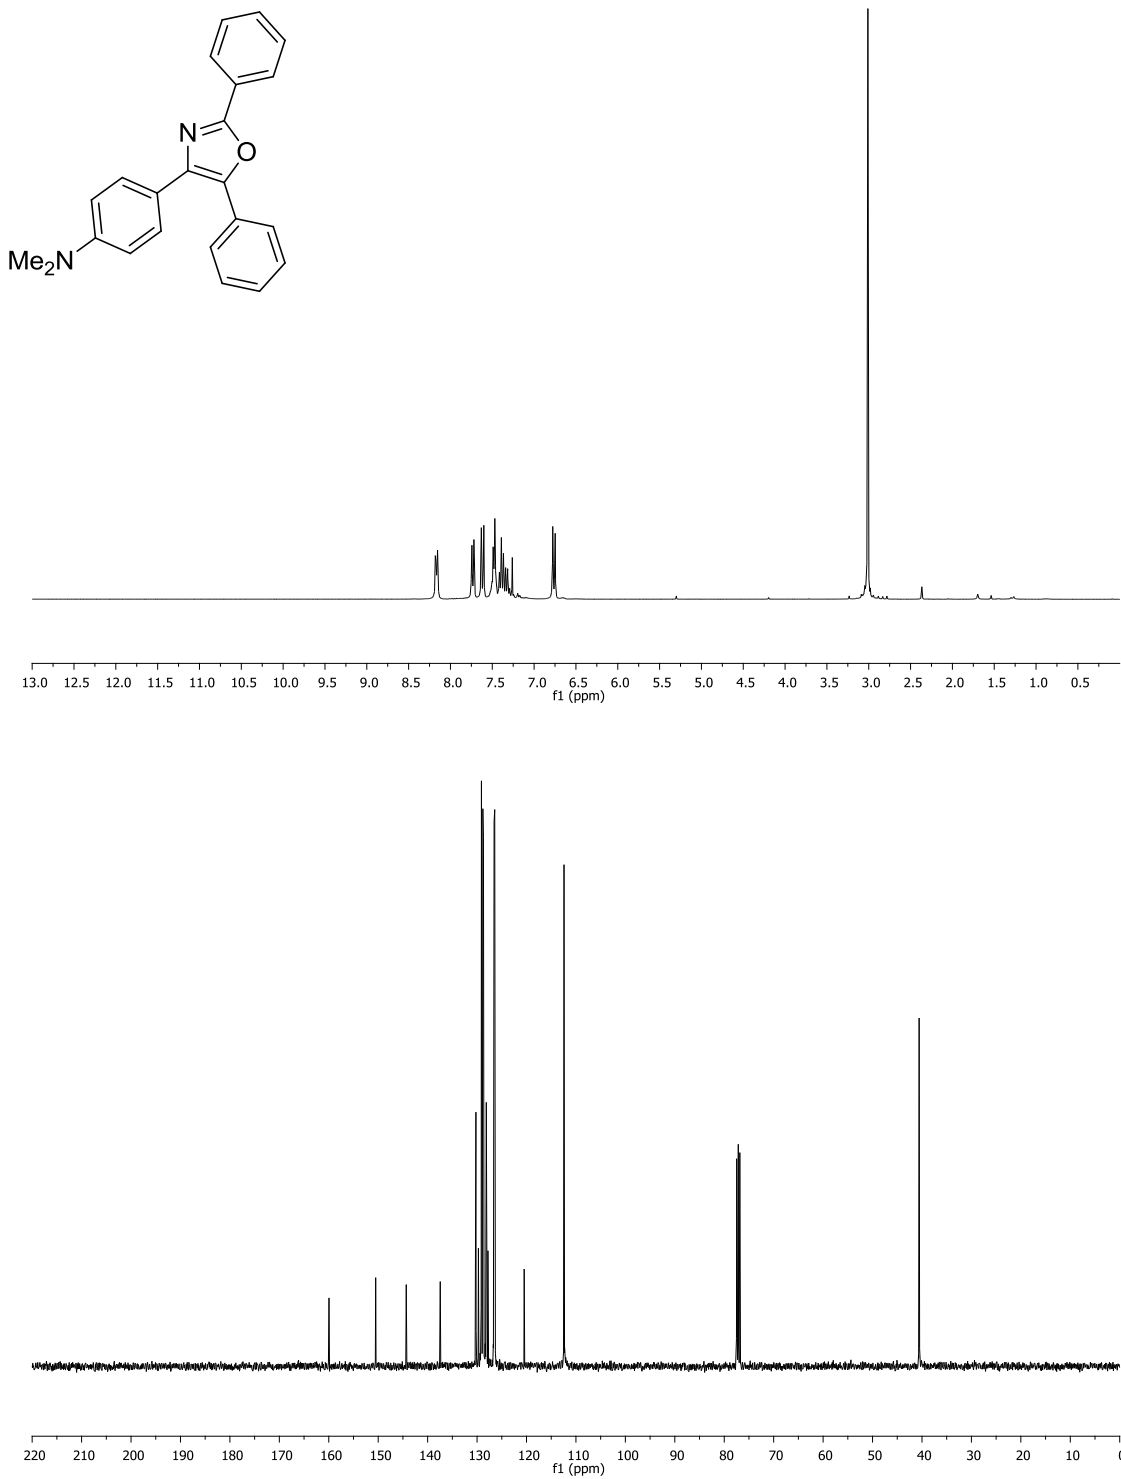

Compound 5ba

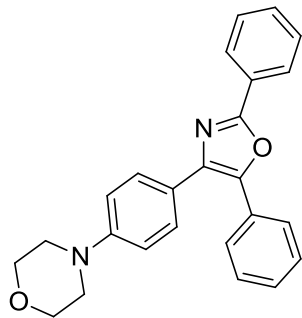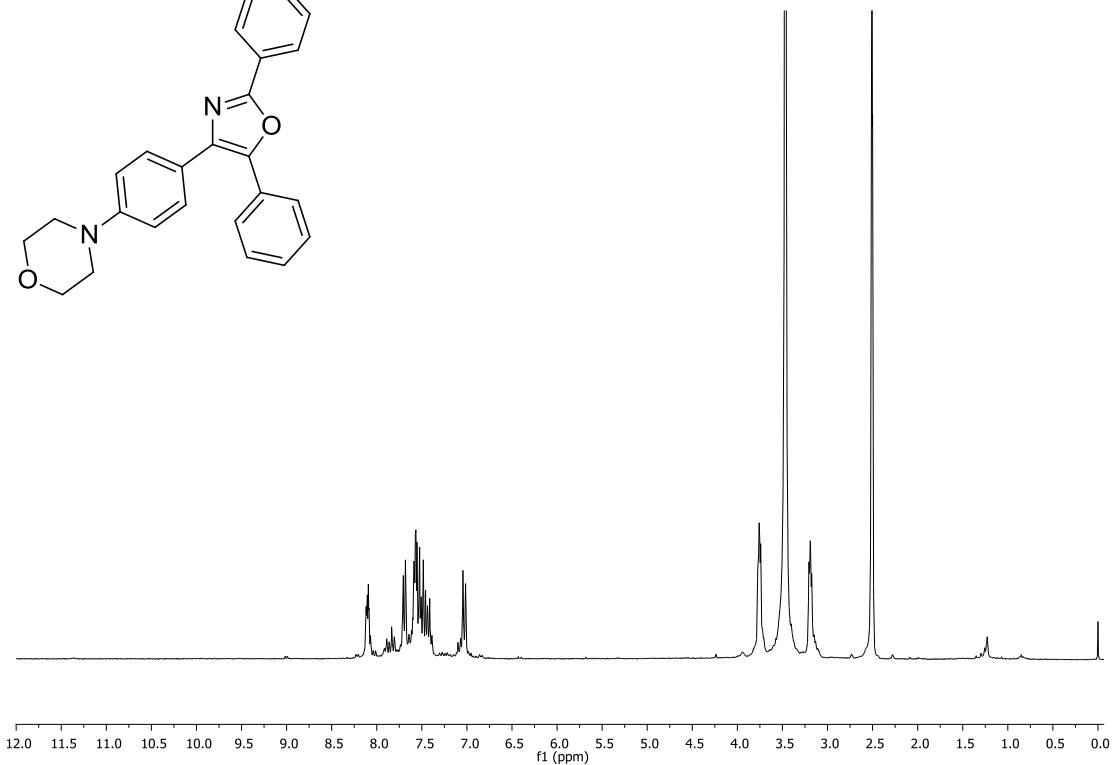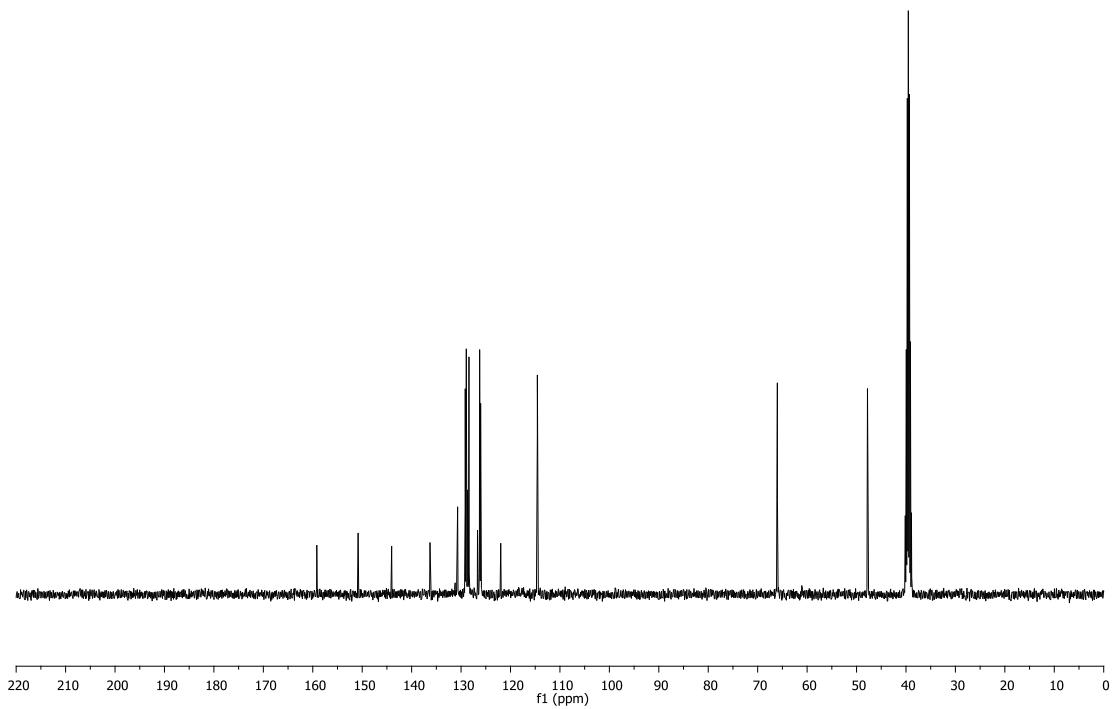

Compound 5ca

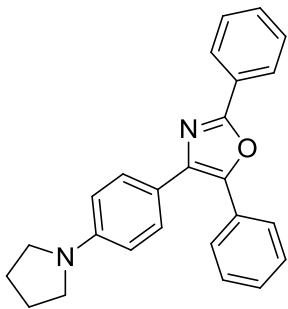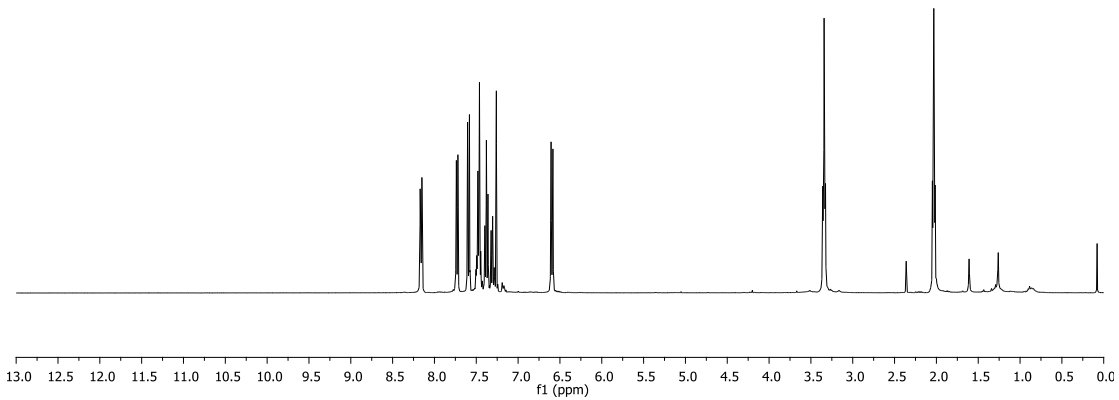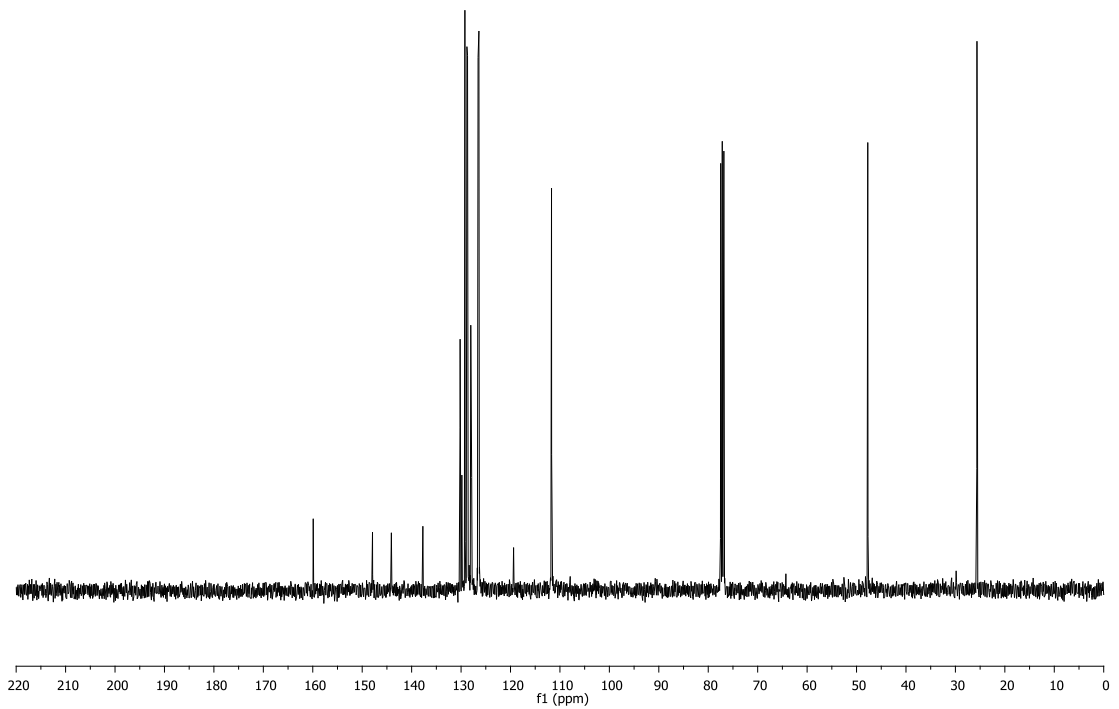

Compound 7

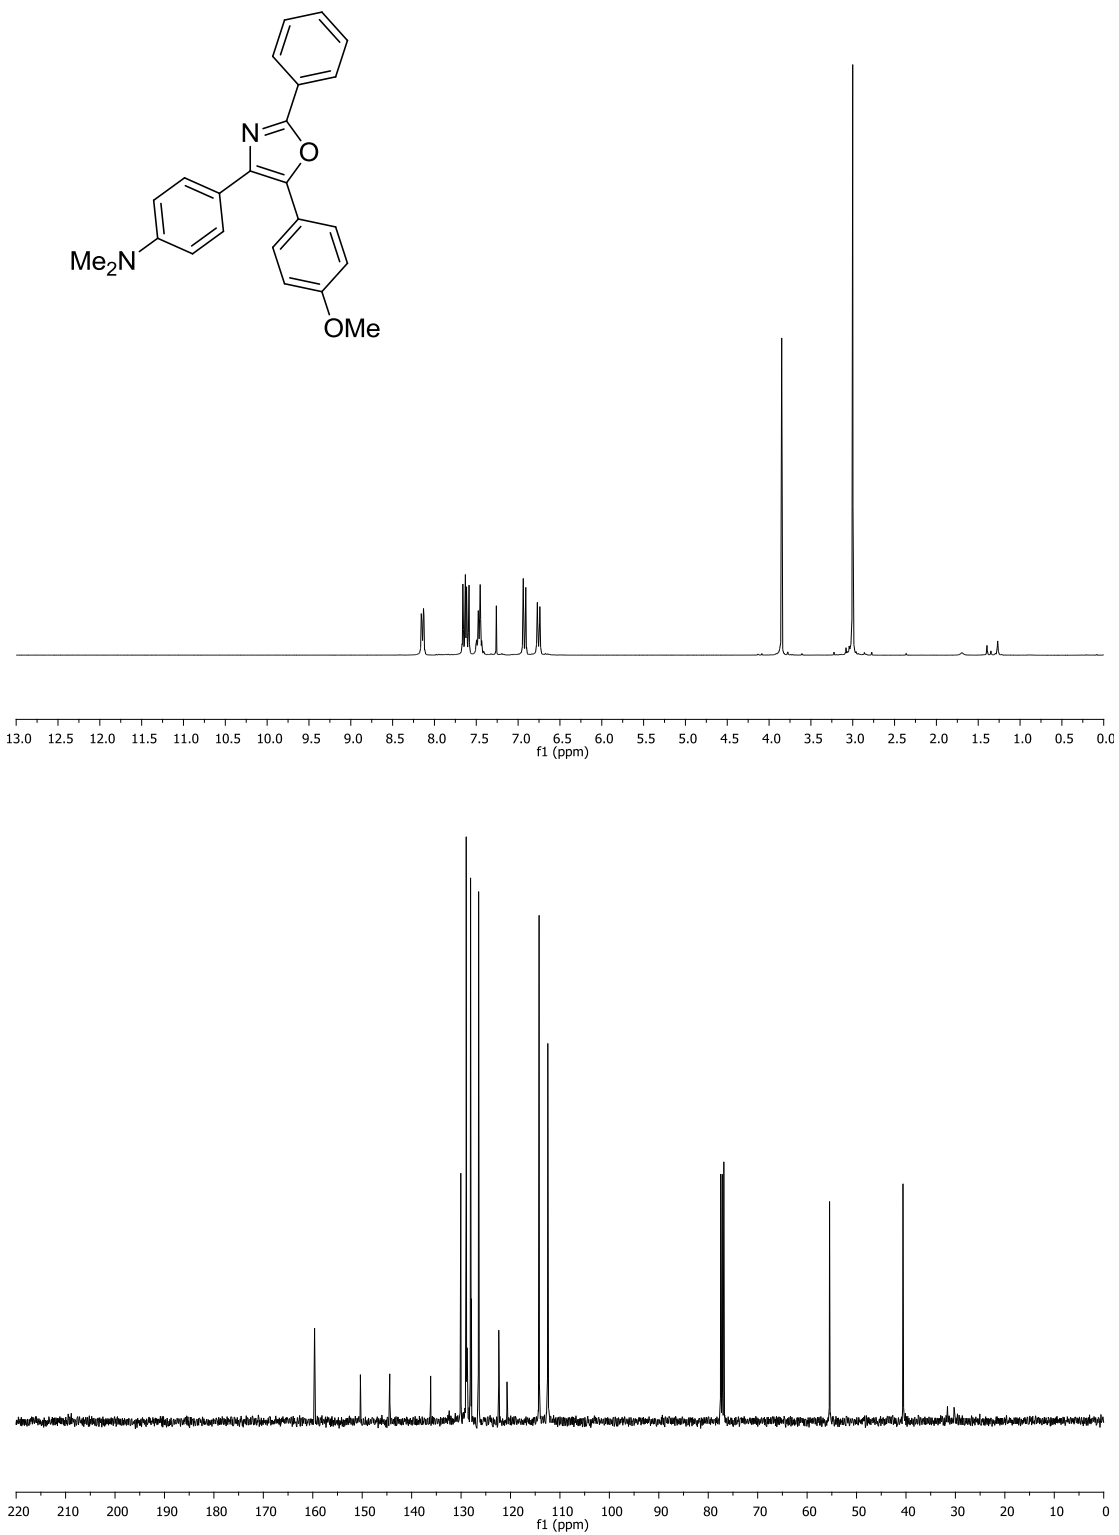

Compound 7 (HSQC spectrum)

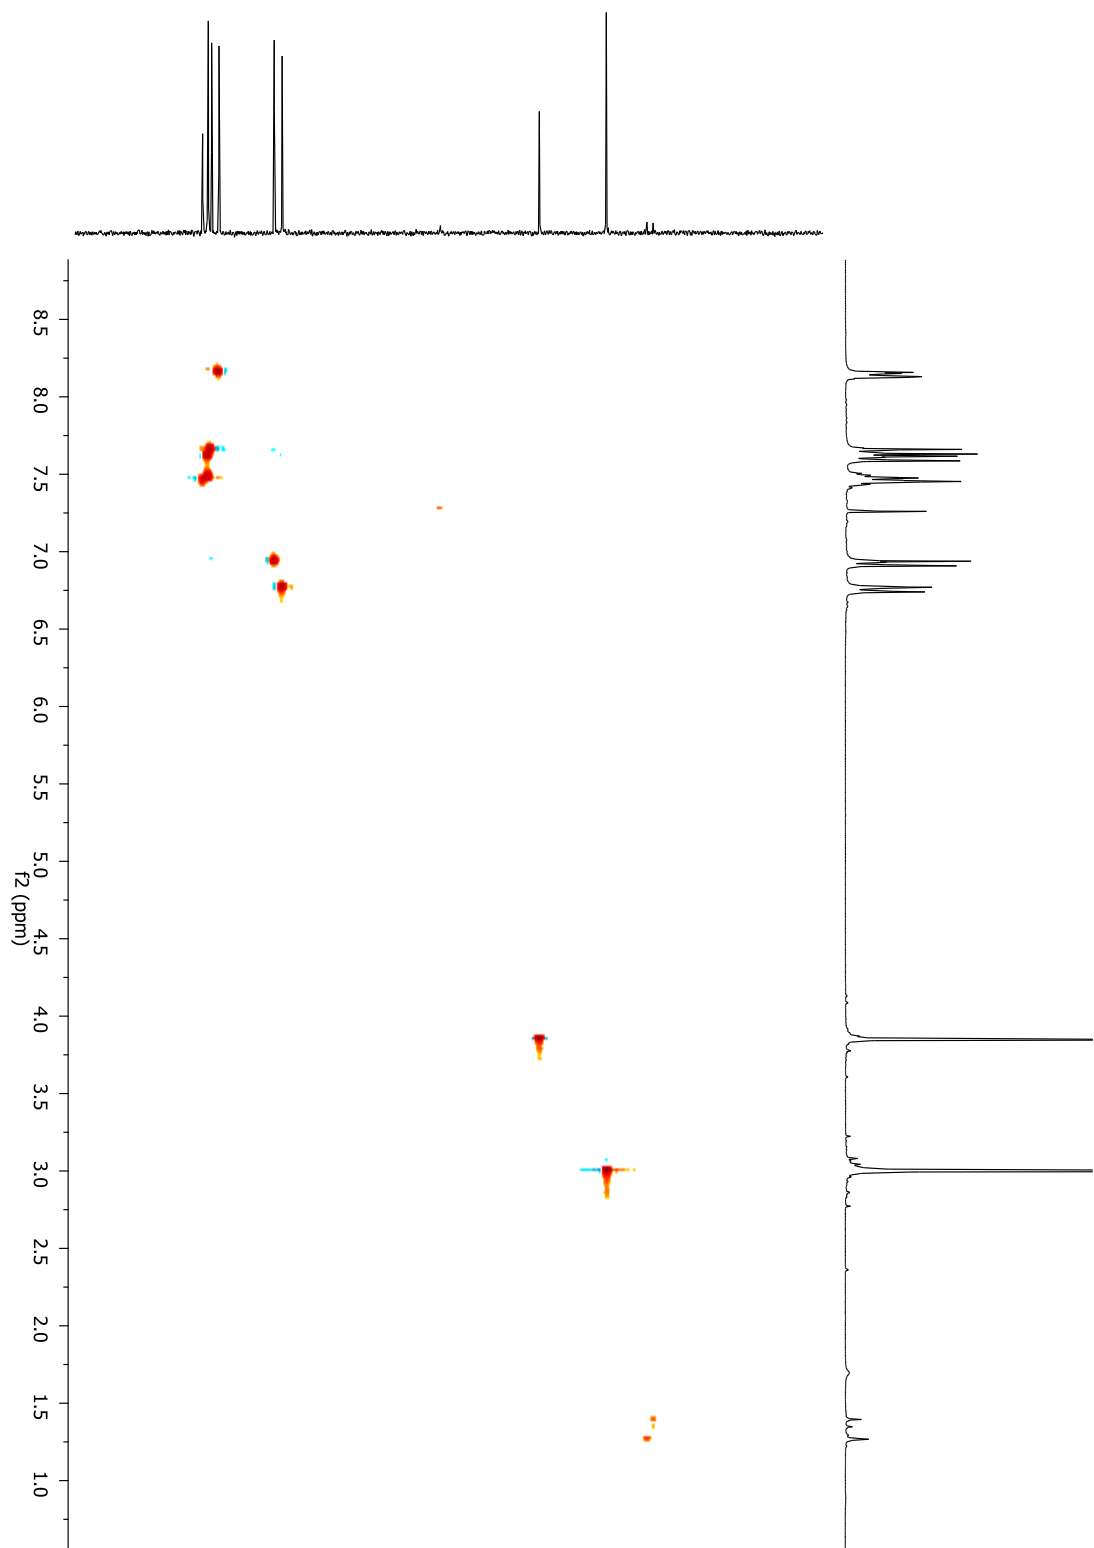

Compound 7 (HSQC spectrum-expanded version)

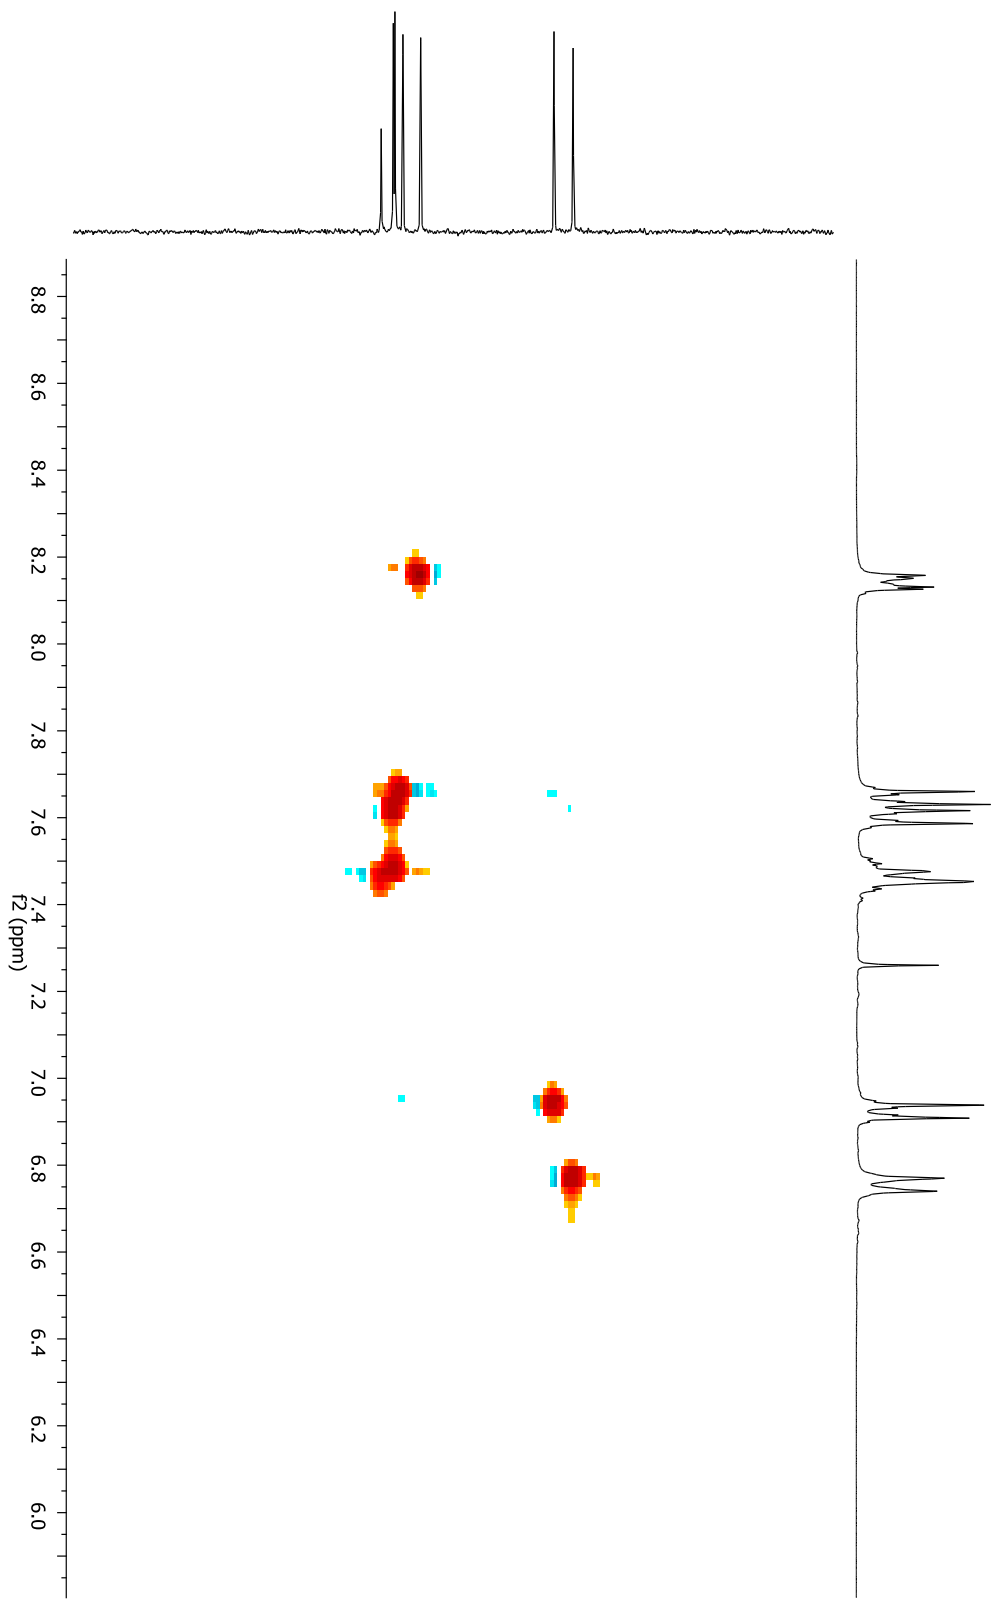

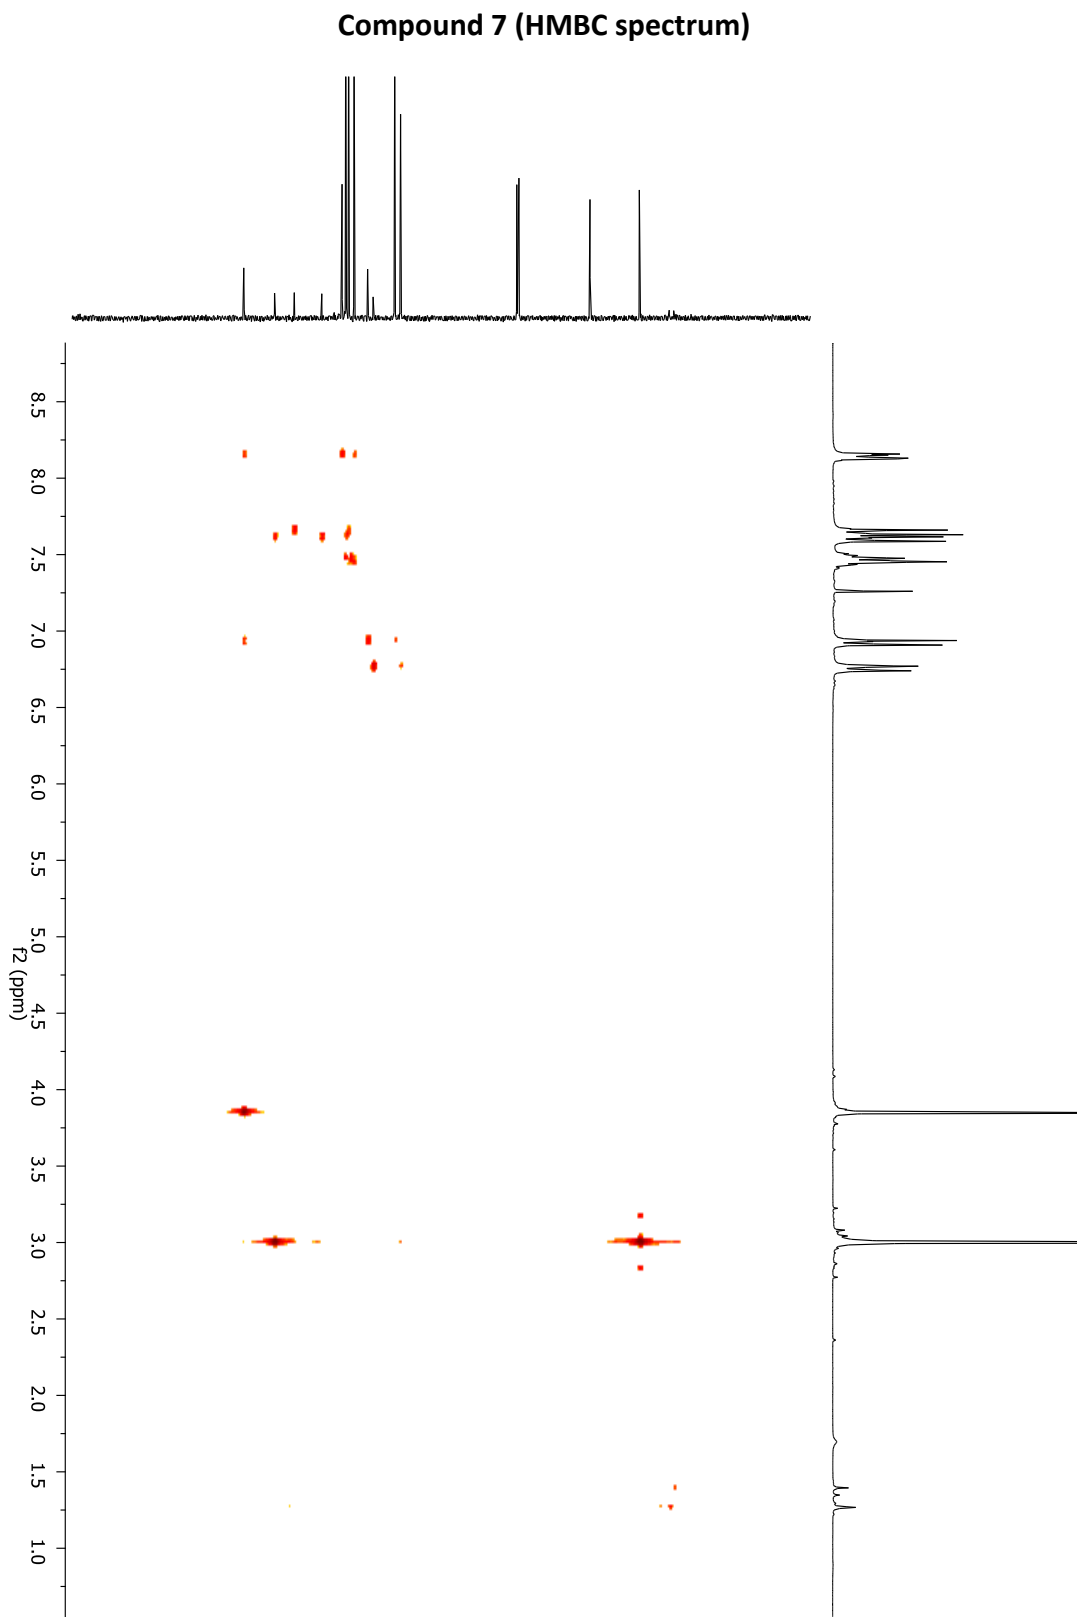

Compound 7 (HMBC spectrum-expanded version)

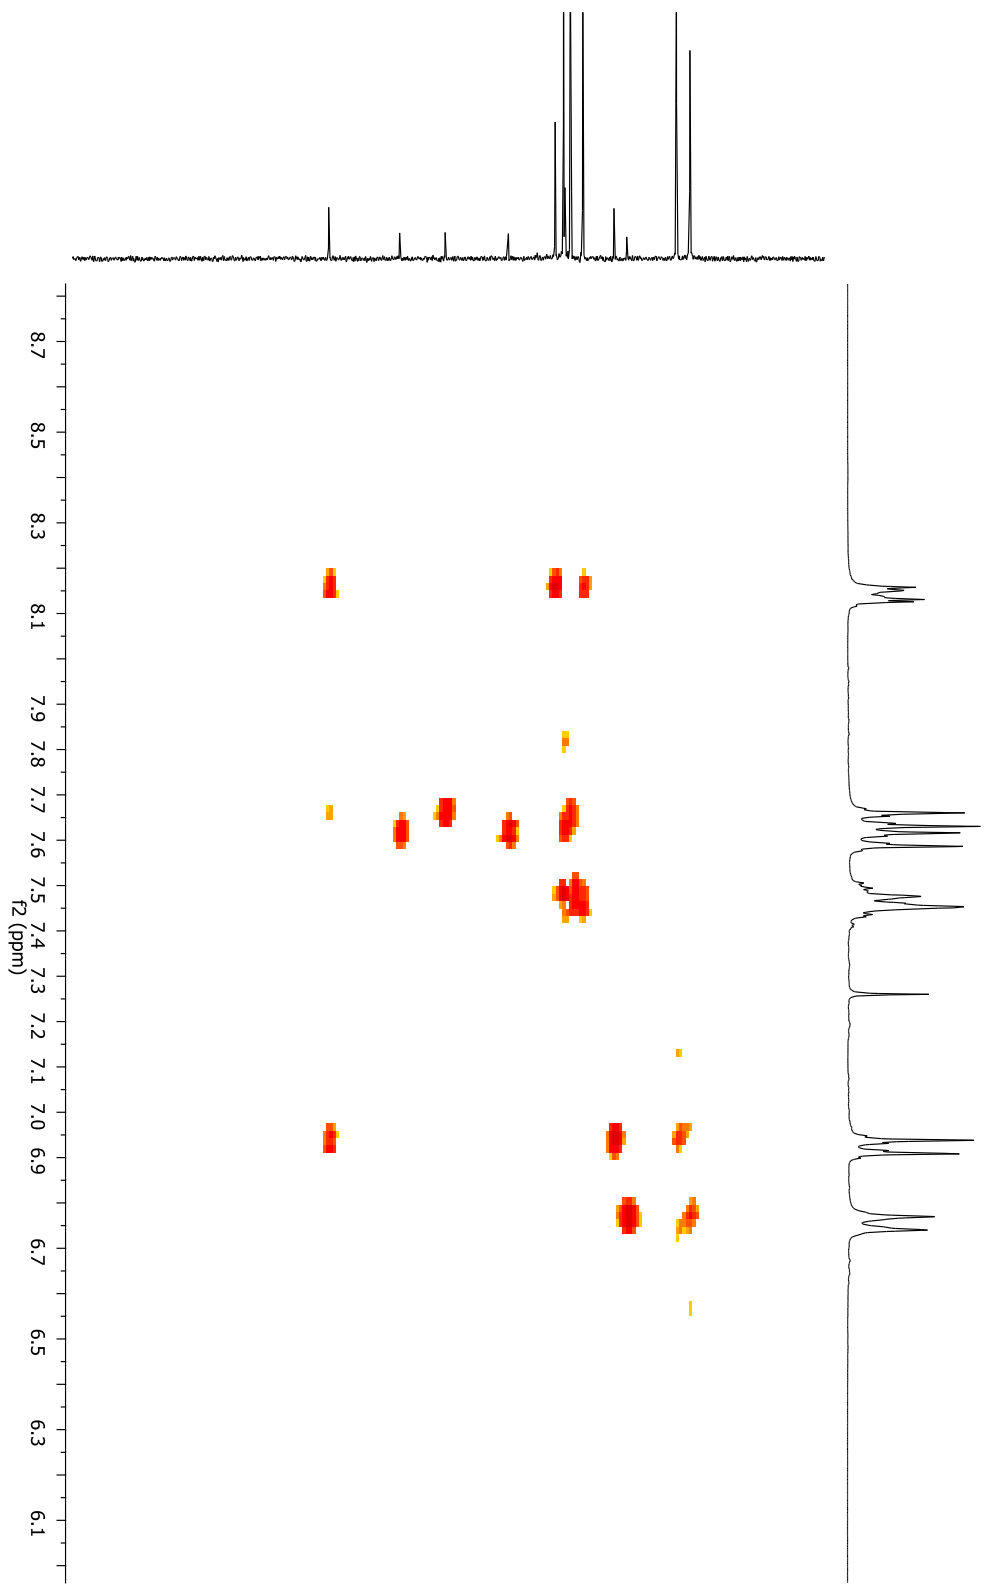

Supplement: c3cc45410j.pdf [file c3cc45410j.pdf]
